# Supplementary material for: The clustering of cardiovascular disease risk factors and their impacts on annual medical expenditure in Japan: community-based cost analysis using Gamma regression models
Source: PubMed Central journal article supplement — BMJ Open. 2013 Mar 15;3(3):e002234. doi: 10.1136/bmjopen-2012-002234 (PMC3612762; doi:10.1136/bmjopen-2012-002234), 2013-03-15
Supplement: bmjopen-2012-002234.draft_revisions.pdf [file bmjopen-2012-002234.draft_revisions.pdf]

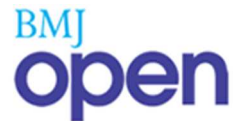

**The clustering of cardiovascular disease risk factors and their impacts on annual medical expenditure in Japan: community-based cost minimization analysis using Gamma regression models**

|                                 |                                                                                                                                                                                                                                                                                                                                                                                                |
|---------------------------------|------------------------------------------------------------------------------------------------------------------------------------------------------------------------------------------------------------------------------------------------------------------------------------------------------------------------------------------------------------------------------------------------|
| Journal:                        | <i>BMJ Open</i>                                                                                                                                                                                                                                                                                                                                                                                |
| Manuscript ID:                  | bmjopen-2012-002234                                                                                                                                                                                                                                                                                                                                                                            |
| Article Type:                   | Research                                                                                                                                                                                                                                                                                                                                                                                       |
| Date Submitted by the Author:   | 19-Oct-2012                                                                                                                                                                                                                                                                                                                                                                                    |
| Complete List of Authors:       | Murakami, Yoshitaka ; Shiga University of Medical Science, Medical Statistics<br>Okamura, Tomonori; Keio University, Preventive Medicine and Public Health<br>Nakamura, Koshi; Kanazawa Medical University, Epidemiology and Public Health<br>Miura, katsuyuki; Shiga University of Medical Science, Health Science<br>Ueshima, Hirotsugu; Shiga University of Medical Science, Health Science |
| <b>Primary Subject Heading</b>: | Health economics                                                                                                                                                                                                                                                                                                                                                                               |
| Secondary Subject Heading:      | Epidemiology, Cardiovascular medicine, Public health                                                                                                                                                                                                                                                                                                                                           |
| Keywords:                       | Cost minimization analysis, Cardiovascular disease risk factor, Medical expenditure, Japan, Elderly population                                                                                                                                                                                                                                                                                 |
|                                 |                                                                                                                                                                                                                                                                                                                                                                                                |

SCHOLARONE™  
Manuscripts

only

1  
2  
3  
4  
5  
6  
7  
8  
9 **The clustering of cardiovascular disease risk factors and their impacts on annual medical**  
10  
11 **expenditure in Japan: community-based cost minimization analysis using Gamma regression**  
12  
13 **models**  
14  
15  
16  
17  
18  
19

20  
21 Yoshitaka Murakami, Tomonori Okamura, Koshi Nakamura, Katsuyuki Miura, Hirotsugu Ueshima  
22  
23

24  
25  
26 Yoshitaka Murakami associate professor Department of Medical Statistics, Shiga University of  
27  
28 Medical Science, Seta Tsukinowa-cho, Otsu, Shiga 520-2192, Japan Tomonori Okamura professor  
29  
30 Department of Preventive Medicine and Public Health, Keio University, Shinano-machi 35,  
31  
32 Shinjuku-ku, Tokyo 160-8582, Japan Koshi Nakamura associate professor Department of  
33  
34 Epidemiology and Public Health, Kanazawa Medical University, 1-1 Daigaku, Uchinada, Ishikawa  
35  
36 920-0293, Japan Katsuyuki Miura professor Department of Health Science, Shiga University of  
37  
38 Medical Science, Otsu, Seta Tsukinowa-cho, Otsu, Shiga 520-2192, Japan Hirotsugu Ueshima  
39  
40 professor Lifestyle-related Disease Prevention Centre, Shiga University of Medical Science, Seta  
41  
42 Tsukinowa-cho, Otsu, Shiga 520-2192, Otsu, Japan Department of Health Science, Shiga University  
43  
44 of Medical Science, Otsu, Japan  
45  
46  
47  
48  
49  
50  
51  
52  
53  
54  
55  
56  
57  
58  
59  
60

Correspondence to: Y Murakami ymura@belle.shiga-med.ac.jp

## Abstract

**Objective** The clustering of cardiovascular disease (CVD) risk factors is a serious threat to a population health. This detrimental effect also increases medical expenses, especially for the elderly population. The present age-specific investigation into medical expenditure, especially focused on the elderly, is thus indispensable for formulating public health policy given the extent of the ageing population in developed countries.

**Design** Cost minimization analysis using individuals' medical expenses and their corresponding health examination measures.

**Setting** Shiga prefecture, Japan, from April 2000 to March 2006.

**Participants** 39,114 participants aged 40 years and over.

**Main outcome measures** Mean annual medical expenditure.

**Methods** Gamma regression models were applied to examine how the number of CVD risk factors affects annual medical expenditure. The four CVD risk factors analysed in this study were defined as follows: hypertension (systolic blood pressure >140 mmHg or diastolic blood pressure >90 mmHg), hypercholesterolemia (serum total cholesterol >240 mg/dl), high blood glucose (casual blood glucose >200 mg/dl), and smoking (current smoker). Sex- and age-specific investigations were

1  
2  
3  
4  
5  
6 carried out on the elderly (aged 65 and over) and non-elderly (aged 40 to 64) populations.  
7

8  
9 **Results** The mean annual medical expenditure for the no CVD risk factor group was only 130,000  
10  
11 Yen at age 50 (men: 133,413 Yen, women: 115,470 Yen), but this expenditure was seven times  
12  
13 higher for 80-year-olds who have three or four CVD risk factors (men: 974,449 Yen, women:  
14  
15 906,821 Yen). The total overspend (excess fraction) was larger for the non-elderly (men: 10.2%,  
16  
17 women: 9.3%) than for the elderly (men: -0.7%, women: 4.7%) and largely driven by people with  
18  
19 one or two CVD risk factors, except for elderly men.  
20  
21  
22  
23  
24

25  
26 **Conclusion** A high-risk approach for the elderly and a population approach for the majority are both  
27  
28 necessary to reduce total medical expenditure in Japan.  
29  
30

31  
32 **Keywords:** Cost minimization analysis, Cardiovascular disease risk factor, Medical expenditure,  
33  
34 Japan, Elderly population  
35  
36  
37  
38  
39

#### 40 41 **Article Focus**

42  
43 >Cardiovascular disease risk factors are often clustered in an individual, which seriously increases  
44  
45 the likelihood of suffering from cardiovascular disease and this clustering of risk factors also  
46  
47 increases medical expenses.  
48  
49

50  
51  
52 > The present study examined how age- and sex-specific trends influence total medical expenditure  
53  
54 and assessed how the clustering of CVD risk factors affects the Japanese population.  
55  
56  
57

## Key Messages

>The total overspend of annual medical expenditure is larger for the non-elderly than for the elderly in Japan.

>Larger medical overspends were driven by the groups with one or two risk factors as opposed to those with three or four risk factors, except for elderly men.

## Strengths and Limitations of This Study

>The statistical modelling technique which we applied was suitable for analysing skewed medical expenditure data in contrast to a previous paper.

>Our focus on the elderly, which is considered to be a vulnerable and sometimes frail group, is especially important in developed countries where the proportion of the elderly is increasing.

>The medical expenditure was evaluated over a relatively short time period (six years) despite investigating long-term effects, such as stroke and myocardial infarction.

## Introduction

Hypertension, dyslipidemia, diabetes, and smoking are well-established risk factors for cardiovascular disease (CVD), and the damage caused by these factors is widespread across the developed world.<sup>1</sup> However, it is also well recognized in the literature that a combination of these risk factors in an individual increases the risk of CVD.<sup>2</sup> For example, several studies have shown

1  
2  
3  
4  
5  
6 that the clustering of metabolic risk factors more than doubles the likelihood of CVD mortality.<sup>3,4</sup>

7  
8  
9 Moreover, from a health economics perspective, these individual CVD risk factors<sup>5-7</sup> and their  
10  
11 combination<sup>8-11</sup> have also been reported to increase total medical expenditure in developed countries.

12  
13  
14 Indeed, the public health sectors in many western nations are now facing considerable challenges  
15  
16 because of such spiralling medical expenses.  
17  
18

19  
20 From a financial viewpoint, the elderly population (persons aged 65 and over) is the  
21  
22 greatest consumer of medical resources. However, even though it is clear that individual medical  
23  
24 bills differ by age group, few studies have investigated age-specific medical expenses because of  
25  
26 methodological issues, such as insufficient sample sizes and inappropriate statistical models. To help  
27  
28 bridge this gap in the body of knowledge on this topic, a comprehensive community-based database  
29  
30 for medical expenditure, which includes approximately 60,000 individuals, has been developed in  
31  
32 Shiga, Japan. This database consists of individuals' health examinations and their medical expenses  
33  
34 over a three- to five-year period. Exploring this database allows us to perform an age-specific cost  
35  
36 minimization analysis using Gamma regression models, especially for the elderly population. The  
37  
38 present study thus examines how age- and sex-specific trends influence total medical expenditure  
39  
40 and assesses how the clustering of CVD risk factors affects the Japanese population.  
41  
42  
43  
44  
45  
46  
47  
48  
49  
50

51  
52  
53  
54  
55 **Methods**  
56  
57  
58  
59  
60

## The medical expenditure system in Japan

The payment of medical expenses in Japan is based on a public medical insurance institution that comprises two systems. Since 1961, all Japan residents have been required to enroll in one of these two insurance systems under the so-called 'health insurance for all' scheme. First, the National Health Insurance (NHI) scheme covers self-employed workers (e.g. farmers, fishers, shopkeepers), retirees, and their dependents. The elderly in Japan are thus most often covered by the NHI scheme. The other insurance system (e.g. Health Insurance Society, Mutual Aid Association) covers company employees and their dependents. These two systems cover 65.3% and 34.7% of the Japanese population, respectively. All charges are strictly controlled by a service-specific fee schedule set by the national government that is constant regardless of insurance system or health institution.

## Study population and data

The comprehensive dataset used in this study comprised 64,450 NHI beneficiaries in Shiga prefecture in central Japan. Data on medical expenses and annual health examinations are both key components of this database. Medical expenses data were collected from the database of the Shiga Health Insurance Organization, which is a local branch of the NHI. The original database provides data from April 2000 to March 2006. For the economic evaluation, we calculated mean annual medical expenditure as the sum of monthly medical expenditure divided by the total periods of

1  
2  
3  
4  
5  
6 observation. The data of an annual health examination were provided from every local municipality  
7  
8  
9 of Shiga prefecture. In Japan, an annual health examination was free of charge or inexpensive for all  
10  
11  
12 Japanese, which is entitled by the law (Act on Assurance of Medical Care for Elderly People). Those  
13  
14  
15 data were appropriately stored with security protections in every local municipality. Data on annual  
16  
17  
18 health examinations from April 2000, which included the baseline information for our study, were  
19  
20  
21 provided from all 26 local municipalities in Shiga prefecture. Both medical expenses and health  
22  
23  
24 examination measures were merged into the database using individual identification information (i.e.  
25  
26  
27 name, sex, and date of birth) for the administrative use. This merging process was conducted by the  
28  
29  
30 Shiga Health Insurance Organization, the public agency for paying insurance. The anonymous  
31  
32  
33 dataset were extracted from the database and then, participants who displayed signs of blood  
34  
35  
36 pressure, serum total cholesterol, casual blood glucose, and smoking habits (see next subsection)  
37  
38  
39 were included in the analysis (n=31,119). Medical research ethics committee approval was granted  
40  
41  
42 by the Shiga University of Health Science Research Ethics Committee (17-20-1).

#### 43 44 **Statistical analysis**

45  
46 Specifically, the four CVD risk factors analysed in this study were defined as follows:  
47  
48  
49 hypertension (systolic blood pressure $\geq$ 140 mmHg or diastolic blood pressure $\geq$ 90 mmHg),  
50  
51  
52 hypercholesterolemia (serum total cholesterol $\geq$ 240 mg/dl), high blood glucose (casual blood  
53  
54  
55 glucose $\geq$ 200 mg/dl), and smoking (current smoker). All participants were classified into four  
56  
57  
58  
59  
60



1  
2  
3  
4  
5  
6 categories (i.e. none, one, two, and three or four) based on these four CVD risk factors. The unit of  
7  
8  
9 medical expenditure was set as Japanese Yen (i.e. 100 Japanese yen (JPY) = 0.81 pounds (GBP), at  
10  
11  
12 the exchange rates published on 10 August 2012).

13  
14  
15 Because data on individual medical expenses differed by the period of subscription to the  
16  
17 NHI, individual medical expenses were divided by these periods of subscription and expressed as the  
18  
19 mean expenses per year of follow-up. If a beneficiary withdrew from the NHI or died, follow-up was  
20  
21 stopped at that point. Follow-up was restarted for beneficiaries who withdrew and then re-enrolled in  
22  
23  
24  
25  
26 the NHI.

27  
28  
29 A gamma regression model, which is a member of generalized linear models<sup>12</sup>, was used to  
30  
31  
32 estimate the mean annual medical expenditure of the abovementioned four categories after adjusting  
33  
34  
35 for confounding factors. As medical expenditure data usually involve a substantial proportion of  
36  
37  
38 zeros and some extreme values, their distribution was skewed to the right<sup>13-15</sup>. A gamma regression  
39  
40  
41 is the best modelling approach to deal with this skewness.

42  
43  
44 Statistical models were formulated by sex and age. Specifically, we estimated age-specific  
45  
46  
47 annual medical expenditure for the following four ages: 50 years, 60 years, 70 years, and 80 years.  
48  
49  
50 These estimated expenses were then plotted against the number of CVD risk factors. The regional  
51  
52  
53 variation of local municipalities in Shiga prefecture was considered using the generalized estimating  
54  
55  
56 equation (GEE) approach<sup>12</sup>, which accounts for any correlation within each municipality.  
57  
58  
59  
60

1  
2  
3  
4  
5  
6 To describe how the increasing number of CVD risk factors affects total medical  
7  
8  
9 expenditure in Japan, age-adjusted mean annual medical expenditure and the corresponding number  
10  
11  
12 of participants were also graphed, both for the elderly (aged 65 and over) and for the non-elderly  
13  
14 (aged 40 to 64) populations. The cost ratios and overspend (excess fraction) were also calculated for  
15  
16  
17 each CVD risk factor group. The cost ratio represents the estimated annual medical expenditure of  
18  
19  
20 the corresponding group divided by the reference (i.e. the no CVD risk factor group), while  
21  
22  
23 overspend was calculated as the proportion of a certain group's excess medical expenditure relative  
24  
25  
26 to the whole population. This overspend can be interpreted as the medical expenditure that would not  
27  
28  
29 have occurred if the participants had possessed no CVD risk factors. All statistical analysis was  
30  
31  
32 performed using SAS release 9.20 (SAS Institute Inc., Cary, NC, USA).  
33  
34  
35  
36  
37

## 38 Results

39  
40  
41 Table 1 compares the baseline characteristics of the four CVD risk factor groups. As the  
42  
43  
44 number of CVD risk factors increases, the means of systolic blood pressure, total cholesterol, and  
45  
46  
47 blood glucose and the proportion of current smokers grow in both men and women. The most  
48  
49  
50 prevalent CVD risk factors in the study participants are, first, hypertension in both men and women  
51  
52  
53 followed by smoking in men and cholesterol in women.  
54

55 Figure 1 shows the age-specific estimated annual medical expenditure for each CVD risk  
56  
57  
58

1  
2  
3  
4  
5  
6 factor group by sex and age. Most age group graphs indicate a gradual increase in medical  
7  
8  
9 expenditure as the number of CVD risk factors rises for both men and women. This figure shows  
10  
11  
12 that the mean annual medical expenditure for the no CVD risk factor group is just 130,000 Yen at  
13  
14 age 50 (men: 133,413 Yen, women: 115,470 Yen), but that this expenditure is seven times higher for  
15  
16  
17 80-year-olds who have three or four CVD risk factors (men: 974,449 Yen, women: 906,821 Yen).  
18  
19

20  
21 Figure 2 shows the distribution of the number of CVD risk factors and their corresponding  
22  
23 mean annual medical expenditure for the four subgroups (i.e. non-elderly men, elderly men,  
24  
25 non-elderly women, elderly women) adjusted by age. The corresponding cost ratios and overspends  
26  
27 (excess fractions) in each group are also shown by sex and age. The adjusted annual medical  
28  
29 expenditure increases as the number of CVD risk factors rises, meaning that the cost ratio for the  
30  
31 group with three or four CVD risk factors increases by more than 40% relative to the reference  
32  
33 group. These trends were most obvious in elderly women (cost ratio: 1.74). The total overspend was  
34  
35 larger in the non-elderly population (men: 10.2%, women: 9.3%) than it was in the elderly (men:  
36  
37 -0.7%, women: 4.7%). The total overspend was mostly driven by the groups with one (non-elderly  
38  
39 men: 3.6%, non-elderly women: 4.9%, elderly women: 3.0%) or two risk factors (non-elderly men:  
40  
41 5.4%, non-elderly women: 4.1%, elderly women: 1.4%) compared with three or four risk factors  
42  
43 (non-elderly men: 1.2%, non-elderly women: 0.3%, elderly women: 0.3%), with the exception of  
44  
45 elderly men.  
46  
47  
48  
49  
50  
51  
52  
53  
54  
55  
56  
57  
58  
59  
60

## Discussion

We performed a community-based cost minimization analysis to investigate the sex- and age-specific effects of CVD risk factor clustering on total medical expenditure in Japan. We measured the relative increases (cost ratios) and population impacts (overspends) and found that annual medical expenditure increases as the number of CVD risk factors rises in all age and sex groups. While the relative increase in the group with three or four CVD risk factors was greatest, the population impacts on total medical expenditure were larger among the group with one or two CVD risk factors.

The findings from the Framingham study have already shown that Medicare costs increase with combinations of risk factors, such as hypertension, smoking, and hypercholesterolemia.<sup>8</sup> Studies from the United States<sup>9</sup> and Japan<sup>10,11</sup> have also shown similar increasing patterns in the community setting. Our study showed that the cost ratios in the three or four CVD risk factor group were between 1.44 and 1.74, which are similar to the values found in the Framingham study<sup>8</sup> and another study in Japan<sup>10</sup>. However, other studies have found relatively larger ratios, such as 1.84–2.45 in the United States<sup>9</sup> and 1.91 in Japan<sup>11</sup>, since medical expenditure is largely affected by the insurance system, study participants, and the region. The different characteristics of these previous studies, such as the definition of risk factors, length of study periods, and estimation procedures

1  
2  
3  
4  
5  
6 (statistical models), also affect their results.  
7  
8

9 The strength of our study is that the statistical modelling technique applied was suitable for  
10 analysing skewed medical expenditure data in contrast to a previous paper. We applied a Gamma  
11 regression model<sup>12-15</sup> for the cost minimization analysis<sup>16</sup> in order to investigate in-depth sex- and  
12 age-specific attributes, which is difficult in a stratified analysis. Our focus on the elderly is  
13 especially important in developed countries, where the ageing population is increasing the  
14 proportion of the elderly, which is considered to be a vulnerable and sometimes frail group.  
15  
16  
17  
18  
19  
20  
21  
22  
23  
24

25 It is important to note that individual medical expenses were highest in the three or four  
26 CVD risk factor group for all subgroups. This population would thus be the main target for high-risk  
27 approaches to contain medical expenditure growth. High-risk strategies, such as comprehensive  
28 health guidance by public health nurses, dieticians, or physicians, can be readily understood and they  
29 can strongly motivate people to change their lifestyles to manage CVD risk factors.  
30  
31  
32  
33  
34  
35  
36  
37  
38  
39

40 However, from the viewpoint of total medical expenditure, people with one or two CVD  
41 risk factors are not negligible. This population had a greater influence on total medical expenditure  
42 than did the high-CVD risk factor group, especially in the non-elderly, which accounted for 9% of  
43 total medical expenditure when the one and two CVD risk factor groups were combined compared  
44 with 4.4% for elderly women and -0.7% for elderly men. However, it is difficult to implement  
45 effective high-risk strategies because of the large population of people with one or two CVD risk  
46  
47  
48  
49  
50  
51  
52  
53  
54  
55  
56  
57  
58  
59  
60

1  
2  
3  
4  
5  
6 factors. For this group, a population strategy may be useful for gradually lowering the distribution of  
7  
8  
9 CVD risk factors<sup>17</sup>.

10  
11 The present study has several limitations. First, because the public medical insurance  
12  
13 system in Japan is different from those in other developed countries, we should be cautious when  
14  
15 comparing the absolute values of medical expenses for participants in the present study. Second,  
16  
17 medical expenditure was evaluated over a relatively short time period (six years) despite  
18  
19 investigating long-term effects. As severe health events such as stroke and myocardial infarction can  
20  
21 occur after a long interval in high-risk individuals, excess medical expenditure might be  
22  
23 underestimated. Third, data on fasting blood glucose, triglycerides, and HDL-cholesterol were  
24  
25 unavailable. Finally, details of medical diagnoses, medical treatment status (e.g. prescriptions),  
26  
27 clinical condition such as CVD history, and cause of mortality were unavailable. Thus, further  
28  
29 studies are required to clarify the effects of these variables.  
30  
31  
32  
33  
34  
35  
36  
37  
38  
39  
40

41 In conclusion, this investigation into the sex- and age-specific effects of CVD risk factors  
42  
43 on medical expenditure in Japan showed a large relative increase in people with three or four CVD  
44  
45 risk factors. However, the population impacts on total medical expenditure were larger among  
46  
47 people with one or two CVD risk factors, especially in non-elderly women. A high-risk approach for  
48  
49 people with three or four CVD risk factors and a population approach for the majority are thus both  
50  
51  
52  
53  
54  
55 necessary to reduce total medical expenditure in Japan.  
56  
57  
58  
59  
60

### Contributors

YM was involved in database management, data analysis, data interpretation and wrote the manuscript. TO designed the study and was involved in database management, data interpretation and wrote the manuscript. KN was involved in data interpretation and writing the manuscript. KM was involved in data interpretation and writing the manuscript. UH was involved in data interpretation and writing the manuscript.

### Funding

This research was supported by a Grant-in-Aid for Scientific Research (C) from the Japan Society for the Promotion of Science (22590585) and Grants-in-Aid from the Ministry of Health, Labor and Welfare, Health and Labor Sciences Research Grants, Japan (Research on Health Services: H17-Kenkou-007; Comprehensive Research on Cardiovascular and Life-Style Related Diseases: H18-Junkankitou [Seishuu]-Ippan-012; Comprehensive Research on Cardiovascular and Life-Style Related Diseases: H20-Junkankitou [Seishuu]-Ippan-013; Comprehensive Research on Life-Style Related Diseases including Cardiovascular Diseases and Diabetes Mellitus: H20-Junkankitou [Seishuu]-Ippan-013 and Comprehensive Research on Life-Style Related Diseases including Cardiovascular Diseases and Diabetes Mellitus: H23-Junkankitou [Seishuu]-Ippan-005).

### Competing interests

1  
2  
3  
4  
5  
6 None  
7  
8

9 **Ethics approval**

10  
11 Medical research ethics committee approval was granted by the Shiga University of Health Science  
12  
13 Research Ethics Committee (17-20-1).  
14  
15

16  
17 **Provenance and peer review**

18  
19 Not commissioned; externally peer reviewed.  
20  
21

22  
23 **Data sharing statement**

24  
25 No additional data are available.  
26  
27  
28  
29  
30  
31

32 **References**

- 33  
34  
35 1. Ezzati M, Hoorn SV, Rodgers A, Lopez AD, Mathers CD, Murray CJ; Comparative Risk  
36  
37 Assessment Collaborating Group. Estimates of global and regional potential health gains from  
38  
39 reducing multiple major risk factors. *Lancet* 2003;362:271–80.  
40  
41  
42  
43  
44 2. Greenland P, Knoll MD, Stamler J, Neaton JD, Dyer AR, Garside DB, Wilson PW. Major risk  
45  
46 factors as antecedents of fatal and nonfatal coronary heart disease events. *JAMA* 2003;290:891–  
47  
48 7.  
49  
50  
51  
52 3. Kadota A, Hozawa A, Okamura T, Kadowak T, Nakamura K, Murakami Y, Hayakawa T, Kita Y,  
53  
54 Okayama A, Nakamura Y, Kashiwagi A, Ueshima H; NIPPON DATA Research Group.  
55  
56  
57  
58  
59  
60



- 1  
2  
3  
4  
5  
6 Relationship between metabolic risk factor clustering and cardiovascular mortality stratified by  
7  
8  
9 high blood glucose and obesity: NIPPON DATA90, 1990–2000. *Diabetes Care* 2007;30:1533–8.  
10  
11  
12 4. McNeill AM, Rosamond WD, Girman CJ, Golden SH, Schmidt MI, East HE, Ballantyne CM,  
13  
14 Heiss G. The metabolic syndrome and 11-year risk of incident cardiovascular disease in the  
15  
16 atherosclerosis risk in communities study. *Diabetes Care* 2005;28:385–90.  
17  
18  
19  
20 5. Nakamura K, Okamura T, Kanda H, Hayakawa T, Okayama A, Ueshima H; Health Promotion  
21  
22 Research Committee of the Shiga National Health Insurance Organizations. Medical costs of  
23  
24 patients with hypertension and/or diabetes: A 10-year follow-up study of National Health  
25  
26 Insurance in Shiga, Japan. *J Hypertens* 2006;24:2305–9.  
27  
28  
29  
30  
31  
32 6. Izumi Y, Tsuji I, Ohkubo T, Kuwahara A, Nishino Y, Hisamichi S Impact of smoking habit on  
33  
34 medical care use and its costs: a prospective observation of National Health Insurance  
35  
36 beneficiaries in Japan. *Int J Epidemiol.* 2001;30:616–21  
37  
38  
39  
40  
41 7. Daviglus ML, Liu K, Yan LL, et al. Relation of body mass index in young adulthood and middle  
42  
43 age to Medicare expenditures in older age. *JAMA.* 2004;292:2743–9.  
44  
45  
46  
47 8. Schauffler HH, D’Agostino RB, Kannel WB. Risk for cardiovascular disease in the elderly and  
48  
49 associated Medicare costs: The Framingham Study. *Am J Prev Med* 1993;9:146–54.  
50  
51  
52  
53 9. Daviglus ML, Liu K, Greenland P, Dyer AR, Garside DB, Manheim L, et al. Benefit of a  
54  
55 favorable cardiovascular risk-factor profile in middle age with respect to Medicare costs. *N Engl*  
56  
57  
58  
59  
60

- 1  
2  
3  
4  
5  
6 *J Med* 1998;339:1122–9.  
7  
8
- 9 10. Okamura T, Nakamura K, Kanda H, et al. Effect of combined cardiovascular risk factors on  
10  
11 individual and population medical expenditures – A 10-year cohort study of national health  
12  
13 insurance in a Japanese population. *Circ J* 2007;71:807–13  
14  
15
- 16 11. Ohmori-Matsuda K, Kuriyama S, Hozawa A, Nakaya N, Shimazu T, Tsuji I. The joint impact of  
17  
18 cardiovascular risk factors upon medical costs. *Prev Med.* 2007;44:349–55.  
19  
20  
21  
22
- 23 12. Fitzmaurice GM, Laird NM, Ware JH. Applied Longitudinal Analysis Second Edition. New  
24  
25 Jersey: John Wiley & Sons, 2011.  
26  
27  
28
- 29 13. Ramsey S, Willke R, Briggs A et al. Good research practices for cost-effectiveness analysis  
30  
31 alongside clinical trials: the ISPOR RCT-CEA Task Force report. *Value Health.* 2005;8:521–33.  
32  
33  
34
- 35 14. Basu A, Manning WG. Issues for the next generation of health care cost analyses. *Med Care.*  
36  
37 2009;7 (Suppl 1):S109–14.  
38  
39
- 40 15. Manning WG, Basu A, Mullahy J. Generalized modeling approaches to risk adjustment of  
41  
42 skewed outcomes data. *J Health Econ.* 2005;24:465–88.  
43  
44  
45
- 46 16. Glick HA, Doshi JA, Sonnad SS, Polsky D. Economic Evaluation in Clinical Trials. New York:  
47  
48 Oxford University Press, 2007.  
49  
50
- 51 17 · Rose G. Sick individuals and sick populations. *Int J Epidemiol* 1985;14:32–8.  
52  
53  
54  
55  
56  
57  
58  
59  
60

1  
2  
3  
4  
5  
6  
7  
8  
9  
10  
11  
12  
13  
14  
15  
16  
17  
18  
19  
20  
21  
22  
23  
24  
25  
26  
27  
28  
29  
30  
31  
32  
33  
34  
35  
36  
37  
38  
39  
40  
41  
42  
43  
44  
45  
46  
47  
48  
49  
50  
51  
52  
53  
54  
55  
56  
57  
58  
59  
60

For peer review only

Table 1. The baseline characteristics of study participants, Shiga prefectural follow-up study of medical expenditure, 2000–2006

|                        | Number of cardiovascular risk factors* |                        |                      |                    |      |    |     |      |    |        |      |     |     |
|------------------------|----------------------------------------|------------------------|----------------------|--------------------|------|----|-----|------|----|--------|------|-----|-----|
|                        | 0                                      |                        |                      | 1                  |      |    | 2   |      |    | 3 or 4 |      |     |     |
|                        | Men:4890; women:11,737                 | Men:6892, women:10,520 | Men:2337, women:2362 | Men:262, women:114 | Mean | SD | %** | Mean | SD | %**    | Mean | SD  | %** |
| Men                    |                                        |                        |                      |                    |      |    |     |      |    |        |      |     |     |
| Age                    | 70                                     | 11                     | -                    | 68                 | 11   | -  | 67  | 10   | -  | 65     | 10   | -   |     |
| Systolic blood pressur | 123                                    | 11                     | 0                    | 138                | 19   | 54 | 148 | 17   | 87 | 151    | 14   | 96  |     |
| Total cholesterol      | 187                                    | 28                     | 0                    | 191                | 31   | 5  | 201 | 41   | 23 | 231    | 41   | 65  |     |
| Blood glucose          | 104                                    | 24                     | 0                    | 107                | 30   | 1  | 118 | 51   | 8  | 187    | 95   | 49  |     |
| Current smokers        | -                                      | -                      | 0                    | -                  | -    | 39 | -   | -    | 82 | -      | -    | 94  |     |
| Women                  |                                        |                        |                      |                    |      |    |     |      |    |        |      |     |     |
| Age                    | 66                                     | 11                     | -                    | 69                 | 10   | -  | 68  | 10   | -  | 66     | 10   | -   |     |
| Systolic blood pressur | 122                                    | 12                     | 0                    | 143                | 18   | 70 | 150 | 16   | 92 | 155    | 15   | 100 |     |
| Total cholesterol      | 199                                    | 25                     | 0                    | 214                | 34   | 23 | 248 | 33   | 80 | 260    | 28   | 91  |     |
| Blood glucose          | 98                                     | 19                     | 0                    | 102                | 27   | 1  | 114 | 50   | 8  | 174    | 93   | 44  |     |
| Current smokers        | -                                      | -                      | 0                    | -                  | -    | 7  | -   | -    | 20 | -      | -    | 68  |     |

\* The four CVD risk factors analysed in this study were defined as follows: hypertension (systolic blood pressure  $\geq 140$  mmHg or diastolic blood pressure  $\geq 90$  mmHg), hypercholesterolemia (total cholesterol  $\geq 240$  mg/dl), high blood glucose (casual blood glucose  $\geq 200$  mg/dl), and smoking (current smoker).

\*\* For each CVD risk factor, the proportions (%) of participants who possess this risk factor are shown in each category.

### Figure legends

Figure 1. The age- and sex-specific estimated annual medical expenditure by CVD risk factor group.

The black rectangles show the annual medical expenditure of each CVD risk factor group and the corresponding solid lines show their 95% confidence intervals.

Figure 2. The distribution of the number of CVD risk factors, their estimated mean annual medical expenditure, and overspend in the population: (A) men aged 40 to 64, (B) men aged 65 and over, (C) women aged 40 to 64, and (D) women aged 65 and over.

The overspend is the difference between the expenditure of each category and the reference (i.e. the no CVD risk factor group). This was defined as the proportion of excess expenditure relative to total medical expenditure.

1  
2  
3  
4  
5  
6  
7  
8  
9  
10  
11  
12  
13  
14  
15  
16  
17  
18  
19  
20  
21  
22  
23  
24  
25  
26  
27  
28  
29  
30  
31  
32  
33  
34  
35  
36  
37  
38  
39  
40  
41  
42  
43

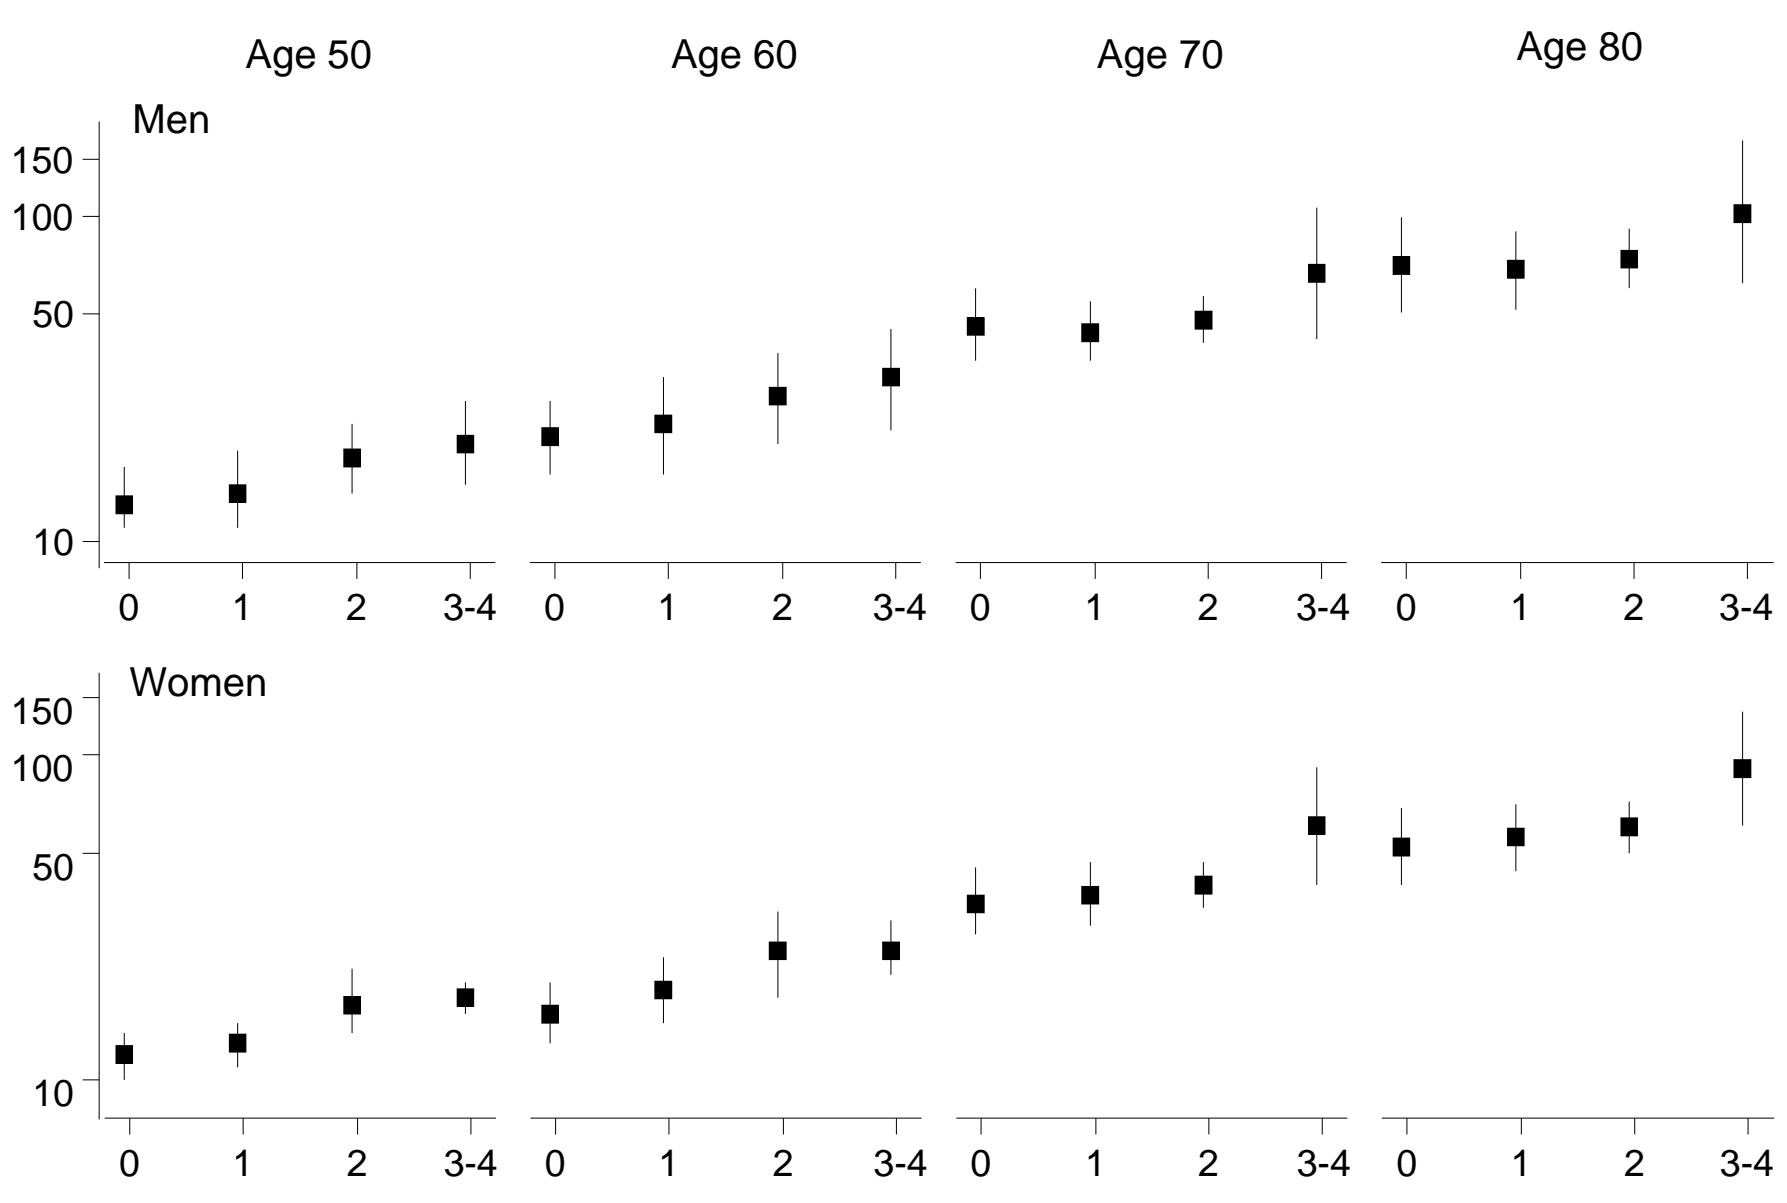

1  
2  
3  
4  
5  
6  
7  
8  
9  
10  
11  
12  
13  
14  
15  
16  
17  
18  
19  
20  
21  
22  
23  
24  
25  
26  
27  
28  
29  
30  
31  
32  
33  
34  
35  
36  
37  
38  
39  
40  
41  
42  
43

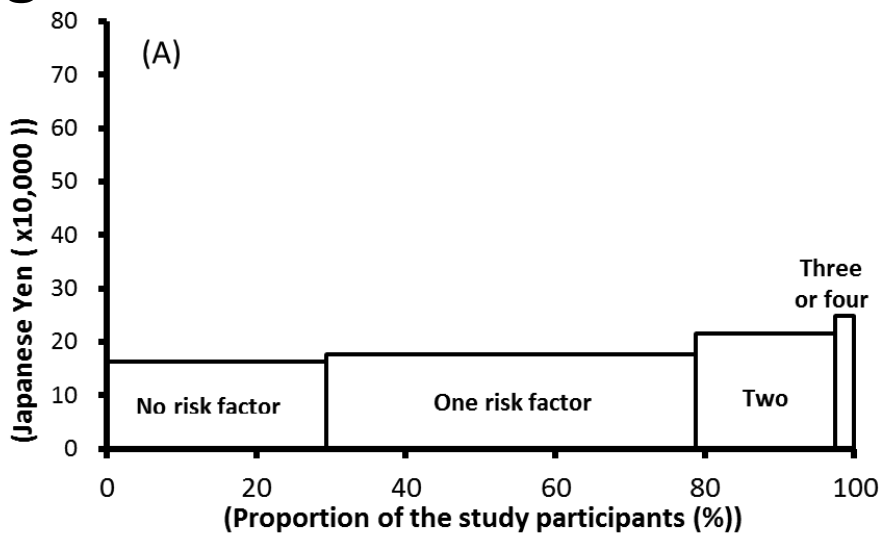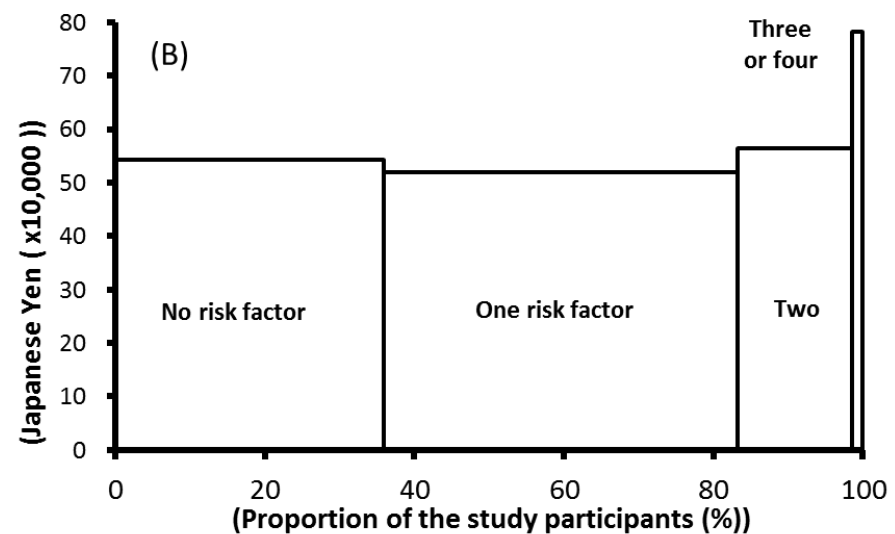

|                     |                 |      |      |      |
|---------------------|-----------------|------|------|------|
| Ratio               | 1.0 (reference) | 1.07 | 1.32 | 1.52 |
| Excess fraction (%) |                 | 3.6  | 5.4  | 1.2  |

|                     |                 |      |      |      |
|---------------------|-----------------|------|------|------|
| Ratio               | 1.0 (reference) | 0.96 | 1.04 | 1.44 |
| Excess fraction (%) |                 | -2.0 | 0.6  | 0.7  |

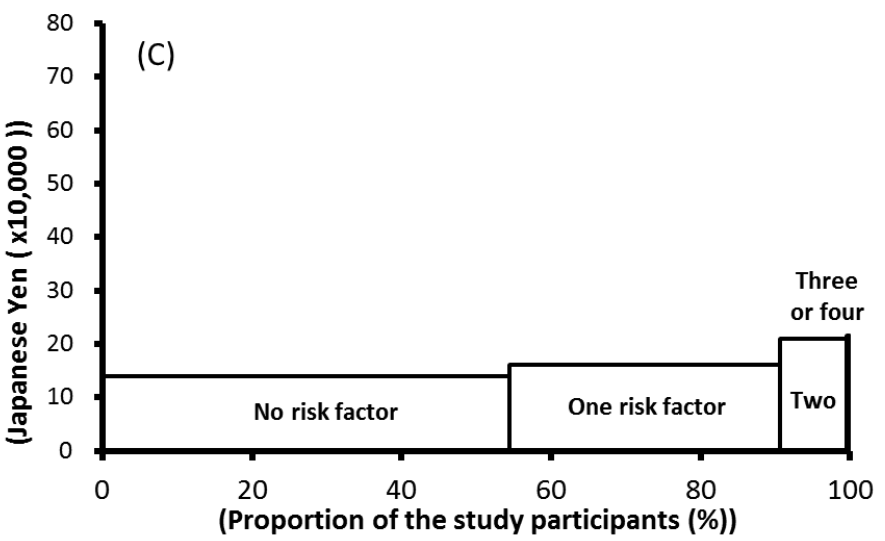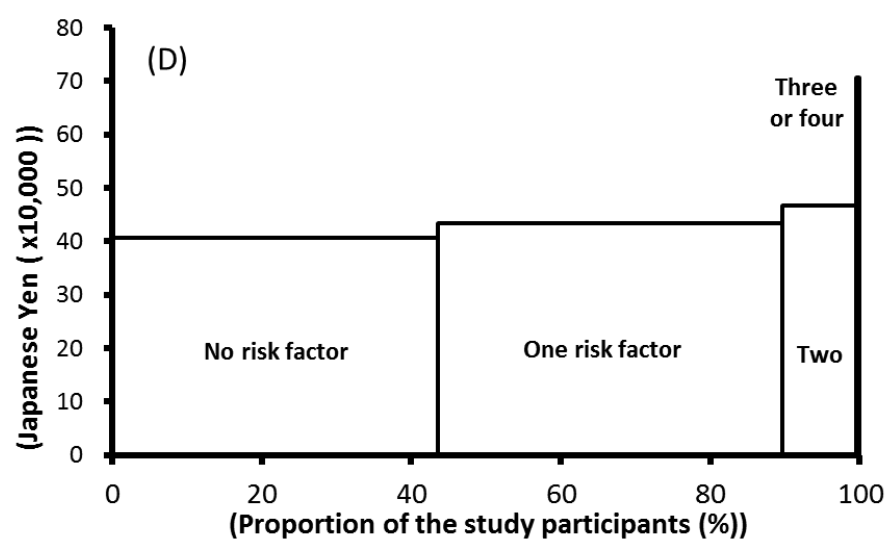

|                     |                 |      |      |      |
|---------------------|-----------------|------|------|------|
| Ratio               | 1.0 (reference) | 1.15 | 1.51 | 1.54 |
| Excess fraction (%) |                 | 4.9  | 4.1  | 0.3  |

|                     |                 |      |      |      |
|---------------------|-----------------|------|------|------|
| Ratio               | 1.0 (reference) | 1.07 | 1.15 | 1.74 |
| Excess fraction (%) |                 | 3.0  | 1.4  | 0.3  |

**Additional file 1**

EVEREST Statement: Checklist for health economics paper

|                                                                                                                                                | <b>Study section</b>     | <b>Additional remarks</b> |
|------------------------------------------------------------------------------------------------------------------------------------------------|--------------------------|---------------------------|
| <b>Study design</b>                                                                                                                            |                          |                           |
| (1) The research question is stated                                                                                                            | Introduction             |                           |
| (2) The economic importance of the research question is stated                                                                                 | Introduction             |                           |
| (3) The viewpoint(s) of the analysis are clearly stated and justified                                                                          | Methods                  |                           |
| (4) The rationale for choosing the alternative programmes or interventions compared is stated                                                  | Introduction and Methods |                           |
| (5) The alternatives being compared are clearly described                                                                                      | Introduction and Methods |                           |
| (6) The form of economic evaluation used is stated                                                                                             | Introduction and Methods |                           |
| (7) The choice of form of economic evaluation is justified in relation to the questions addressed                                              | Introduction and Methods |                           |
|                                                                                                                                                |                          |                           |
| <b>Data collection</b>                                                                                                                         |                          |                           |
| (8) The source(s) of effectiveness estimates used are stated                                                                                   | Methods                  |                           |
| (9) Details of the design and results of effectiveness study are given (if based on single study)                                              | Methods                  |                           |
| (10) Details of the method of synthesis or meta-analysis of estimates are given (if based on an overview of a number of effectiveness studies) | N/A                      |                           |
| (11) The primary outcome measure(s) for the economic evaluation are clearly stated                                                             | Methods                  |                           |
| (12) Methods to value health states and other benefits are stated                                                                              | N/A                      |                           |
| (13) Details of the subjects from whom valuations were obtained are given                                                                      | N/A                      |                           |
| (14) Productivity changes (if included) are reported separately                                                                                | N/A                      |                           |
| (15) The relevance of productivity changes to the study question is discussed                                                                  | N/A                      |                           |
| (16) Quantities of resources are reported separately from their unit costs                                                                     | Methods                  |                           |
| (17) Methods for the estimation of quantities and unit costs are described                                                                     | Methods                  |                           |
| (18) Currency and price data are recorded                                                                                                      | Methods                  |                           |
| (19) Details of currency of price adjustments for inflation or currency conversion are given                                                   | N/A                      |                           |



|                                                                                          |                   |  |
|------------------------------------------------------------------------------------------|-------------------|--|
| (20) Details of any model used are given                                                 | Methods           |  |
| (21) The choice of model used and the key parameters on which it is based are justified  | Methods           |  |
|                                                                                          |                   |  |
| <b>Analysis and interpretation of results</b>                                            |                   |  |
| (22) Time horizon of costs and benefits is stated                                        | Methods           |  |
| (23) The discount rate(s) is stated                                                      | N/A               |  |
| (24) The choice of rate(s) is justified                                                  | N/A               |  |
| (25) An explanation is given if costs or benefits are not discounted                     | N/A               |  |
| (26) Details of statistical tests and confidence intervals are given for stochastic data | Methods           |  |
| (27) The approach to sensitivity analysis is given                                       | N/A               |  |
| (28) The choice of variables for sensitivity analysis is justified                       | N/A               |  |
| (29) The ranges over which the variables are varied are stated                           | N/A               |  |
| (30) Relevant alternatives are compared                                                  | Methods           |  |
| (31) Incremental analysis is reported                                                    | N/A               |  |
| (32) Major outcomes are presented in a disaggregated as well as aggregated form          | Table and Figures |  |
| (33) The answer to the study question is given                                           | Discussion        |  |
| (34) Conclusions follow from the data reported                                           | Discussion        |  |
| (35) Conclusions are accompanied by the appropriate caveats                              | Discussion        |  |



**The clustering of cardiovascular disease risk factors and their impacts on annual medical expenditure in Japan: community-based cost minimization analysis using Gamma regression models**

|                                 |                                                                                                                                                                                                                                                                                                                                                                                                |
|---------------------------------|------------------------------------------------------------------------------------------------------------------------------------------------------------------------------------------------------------------------------------------------------------------------------------------------------------------------------------------------------------------------------------------------|
| Journal:                        | <i>BMJ Open</i>                                                                                                                                                                                                                                                                                                                                                                                |
| Manuscript ID:                  | bmjopen-2012-002234.R1                                                                                                                                                                                                                                                                                                                                                                         |
| Article Type:                   | Research                                                                                                                                                                                                                                                                                                                                                                                       |
| Date Submitted by the Author:   | 17-Dec-2012                                                                                                                                                                                                                                                                                                                                                                                    |
| Complete List of Authors:       | Murakami, Yoshitaka ; Shiga University of Medical Science, Medical Statistics<br>Okamura, Tomonori; Keio University, Preventive Medicine and Public Health<br>Nakamura, Koshi; Kanazawa Medical University, Epidemiology and Public Health<br>Miura, katsuyuki; Shiga University of Medical Science, Health Science<br>Ueshima, Hirotsugu; Shiga University of Medical Science, Health Science |
| <b>Primary Subject Heading</b>: | Health economics                                                                                                                                                                                                                                                                                                                                                                               |
| Secondary Subject Heading:      | Epidemiology, Cardiovascular medicine, Public health                                                                                                                                                                                                                                                                                                                                           |
| Keywords:                       | Cost minimization analysis, Cardiovascular disease risk factor, Medical expenditure, Japan, Elderly population                                                                                                                                                                                                                                                                                 |
|                                 |                                                                                                                                                                                                                                                                                                                                                                                                |

SCHOLARONE™  
Manuscripts

only

1  
2  
3  
4  
5  
6 **The clustering of cardiovascular disease risk factors and their impacts on annual medical**  
7  
8  
9 **expenditure in Japan: community-based cost minimization analysis using Gamma regression**  
10  
11 **models**  
12

13  
14  
15  
16  
17  
18 Yoshitaka Murakami, Tomonori Okamura, Koshi Nakamura, Katsuyuki Miura, Hirotsugu Ueshima  
19

20  
21  
22  
23 Yoshitaka Murakami associate professor Department of Medical Statistics, Shiga University of  
24  
25  
26 Medical Science, Seta Tsukinowa-cho, Otsu, Shiga 520-2192, Japan Tomonori Okamura professor  
27  
28  
29 Department of Preventive Medicine and Public Health, Keio University, Shinano-machi 35,  
30  
31  
32 Shinjuku-ku, Tokyo 160-8582, Japan Koshi Nakamura associate professor Department of  
33  
34  
35 Epidemiology and Public Health, Kanazawa Medical University, 1-1 Daigaku, Uchinada, Ishikawa  
36  
37  
38 920-0293, Japan Katsuyuki Miura professor Department of Health Science, Shiga University of  
39  
40  
41 Medical Science, Otsu, Seta Tsukinowa-cho, Otsu, Shiga 520-2192, Japan Hirotsugu Ueshima  
42  
43  
44 professor Lifestyle-related Disease Prevention Centre, Shiga University of Medical Science, Seta  
45  
46  
47 Tsukinowa-cho, Otsu, Shiga 520-2192, Otsu, Japan Department of Health Science, Shiga University  
48  
49  
50 of Medical Science, Otsu, Japan  
51

52  
53  
54  
55 Correspondence to: Y Murakami [ymura@belle.shiga-med.ac.jp](mailto:ymura@belle.shiga-med.ac.jp)  
56  
57  
58  
59  
60

**Abstract**

**Objective** The clustering of cardiovascular disease (CVD) risk factors is a serious threat to a population health. This detrimental effect also increases medical expenses, especially for the elderly population. The age-specific quantitative assessment of the medical expenditure, especially focused on the elderly, is thus indispensable for formulating public health policy given the extent of the ageing population in developed countries.

**Design** Cost minimization analysis using individuals' medical expenses and their corresponding health examination measures.

**Setting** Shiga prefecture, Japan, from April 2000 to March 2006.

**Participants** 39,114 participants aged 40 years and over.

**Main outcome measures** Mean medical expenditure per year.

**Methods** Gamma regression models were applied to examine how the number of CVD risk factors affects mean medical expenditure. The four CVD risk factors analysed in this study were defined as follows: hypertension (systolic blood pressure $\geq$ 140 mmHg or diastolic blood pressure $\geq$ 90 mmHg), hypercholesterolemia (serum total cholesterol $\geq$ 240 mg/dl), high blood glucose (casual blood glucose $\geq$ 200 mg/dl), and smoking (current smoker). Sex- and age-specific investigations were carried out on the elderly (aged 65 and over) and non-elderly (aged 40 to 64) populations.

1  
2  
3  
4  
5  
6 **Results** The mean medical expenditure (per year) for the no CVD risk factor group was only  
7  
8  
9 130,000 Yen at age 50 (men: 133,413 Yen, women: 115,470 Yen), but this expenditure was seven  
10  
11  
12 times higher for 80-year-olds who have three or four CVD risk factors (men: 974,449 Yen, women:  
13  
14 906,821 Yen). The total overspend (excess fraction) was larger for the non-elderly (men: 10.2%,  
15  
16 women: 9.3%) than for the elderly (men: -0.7%, women: 4.7%) and largely driven by people with  
17  
18 one or two CVD risk factors, except for elderly men.  
19  
20  
21

22  
23 **Conclusion** Our quantitative assessments showed that a high-risk approach for the elderly and a  
24  
25  
26 population approach for the majority are both necessary to reduce total medical expenditure in  
27  
28  
29 Japan.  
30  
31

32 **Keywords:** Cost minimization analysis, Cardiovascular disease risk factor, Medical expenditure,  
33  
34 Japan, Elderly population  
35  
36  
37  
38  
39  
40

#### 41 **Article Focus**

42  
43 >Cardiovascular disease risk factors are often clustered in an individual, which seriously increases  
44  
45  
46 the likelihood of suffering from cardiovascular disease and this clustering of risk factors also  
47  
48  
49 increases medical expenses.  
50

51  
52 > The present study examined how age- and sex-specific trends influence total medical expenditure  
53  
54  
55 and assessed how the clustering of CVD risk factors affects the Japanese population.  
56  
57  
58

## Key Messages

>The total overspend of annual medical expenditure is larger for the non-elderly than for the elderly in Japan.

>Larger medical overspends were driven by the groups with one or two risk factors as opposed to those with three or four risk factors, except for elderly men.

## Strengths and Limitations of This Study

>The statistical modelling technique which we applied was suitable for analysing skewed medical expenditure data in contrast to a previous paper.

>Our focus on the elderly, which is considered to be a vulnerable and sometimes frail group, is especially important in developed countries where the proportion of the elderly is increasing.

>The medical expenditure was evaluated over a relatively short time period (six years) despite investigating long-term effects, such as stroke and myocardial infarction.

## Introduction

Hypertension, dyslipidemia, diabetes, and smoking are well-established risk factors for cardiovascular disease (CVD), and the damage caused by these factors is widespread across the developed world.<sup>1</sup> However, it is also well recognized in the literature that a combination of these risk factors in an individual increases the risk of CVD.<sup>2</sup> For example, several studies have shown

1  
2  
3  
4  
5  
6 that the clustering of metabolic risk factors more than doubles the likelihood of CVD mortality.<sup>3,4</sup>  
7

8  
9 Moreover, from a health economics perspective, these individual CVD risk factors<sup>5-7</sup> and their  
10  
11 combination<sup>8-11</sup> have also been reported to increase total medical expenditure in developed countries.  
12

13  
14 Indeed, the public health sectors in many western nations are now facing considerable challenges  
15  
16 because of such spiralling medical expenses.  
17  
18

19  
20 From a financial viewpoint, the elderly population (persons aged 65 and over) is the  
21  
22 greatest consumer of medical resources. However, even though it is clear that individual medical  
23  
24 bills differ by age group, few studies have investigated age-specific medical expenses because of  
25  
26 methodological issues, such as insufficient sample sizes and inappropriate statistical models. To help  
27  
28 bridge this gap in the body of knowledge on this topic, a comprehensive community-based database  
29  
30 for medical expenditure, which includes approximately 60,000 individuals, has been developed in  
31  
32 Shiga, Japan. This database consists of individuals' health examinations and their medical expenses  
33  
34 over a three- to five-year period. Exploring this database allows us to perform an age-specific cost  
35  
36 minimization analysis using Gamma regression models, especially for the elderly population. The  
37  
38 present study thus conducted the age- and sex-specific quantitative assessments of total medical  
39  
40 expenditure and examines how the clustering of CVD risk factors affects the Japanese population.  
41  
42  
43  
44  
45  
46  
47  
48  
49  
50

## 51 52 53 54 55 **Methods** 56 57 58 59 60

## The medical expenditure system in Japan

The payment of medical expenses in Japan is based on a public medical insurance institution that comprises two systems. Since 1961, all Japan residents have been required to enroll in one of these two insurance systems under the so-called ‘health insurance for all’ scheme. First, the National Health Insurance (NHI) scheme covers self-employed workers (e.g. farmers, fishers, shopkeepers), retirees, and their dependents. The elderly in Japan are thus most often covered by the NHI scheme. The other insurance system (e.g. Health Insurance Society, Mutual Aid Association) covers company employees and their dependents. These two systems cover 65.3% and 34.7% of the Japanese population, respectively. All charges are strictly controlled by a service-specific fee schedule set by the national government that is constant regardless of insurance system or health institution.

## Study population and data

The comprehensive dataset used in this study comprised 64,450 NHI beneficiaries in Shiga prefecture in central Japan. Data on medical expenses and annual health examinations are both key components of this database. Medical expenses data were collected from the database of the Shiga Health Insurance Organization, which is a local branch of the NHI. The original database provides data from April 2000 to March 2006. For the economic evaluation, we used a mean medical expenditure (per year), which was calculated by summing all medical expenditure throughout the



1  
2  
3  
4  
5  
6 observation periods and divided by the total observation periods of months. This monthly-based  
7  
8  
9 measure is multiplied twelve to transform a mean medical expenditure (per year). The data of an  
10  
11  
12 annual health examination were provided from every local municipality of Shiga prefecture. In Japan,  
13  
14  
15 an annual health examination was free of charge or inexpensive for all Japanese, which is entitled by  
16  
17  
18 the law (Act on Assurance of Medical Care for Elderly People). Those data were appropriately  
19  
20  
21 stored with security protections in every local municipality. Data on annual health examinations  
22  
23  
24 from April 2000, which included the baseline information for our study, were provided from all 26  
25  
26  
27 local municipalities in Shiga prefecture. Both medical expenses and health examination measures  
28  
29  
30 were merged into the database using individual identification information (i.e. name, sex, and date of  
31  
32  
33 birth) for the administrative use. This merging process was conducted by the Shiga Health Insurance  
34  
35  
36 Organization, the public agency for paying insurance in Shiga. The anonymous dataset were  
37  
38  
39 extracted from the database and then, participants who displayed signs of blood pressure, serum total  
40  
41  
42 cholesterol, casual blood glucose, and smoking habits (see next subsection) were included in the  
43  
44  
45 analysis (n=31,119). Medical research ethics committee approval was granted by the Shiga  
46  
47  
48 University of Health Science Research Ethics Committee (17-20-1).

### 49 **Statistical analysis**

50  
51  
52 Specifically, the four CVD risk factors analysed in this study were defined as follows:  
53  
54  
55 hypertension (systolic blood pressure $\geq$ 140 mmHg or diastolic blood pressure $\geq$ 90 mmHg),  
56  
57  
58

1  
2  
3  
4  
5  
6 hypercholesterolemia (serum total cholesterol  $\geq 240$  mg/dl), high blood glucose (casual blood  
7  
8 glucose  $\geq 200$  mg/dl), and smoking (current smoker). All participants were classified into four  
9  
10 categories (i.e. none, one, two, and three or four) based on these four CVD risk factors. The unit of  
11  
12 medical expenditure was set as Japanese Yen (i.e. 100 Japanese yen (JPY) = 0.81 pounds (GBP), at  
13  
14 the exchange rates published on 10 August 2012).  
15  
16  
17  
18  
19

20  
21 Because data on individual medical expenses differed by the period of subscription to the  
22  
23 NHI, individual medical expenses were divided by these periods of subscription and expressed as the  
24  
25 mean expenses per year of follow-up. If a beneficiary withdrew from the NHI or died, follow-up was  
26  
27 stopped at that point. Follow-up was restarted for beneficiaries who withdrew and then re-enrolled in  
28  
29 the NHI.  
30  
31  
32  
33  
34

35 A gamma regression model, which is a member of generalized linear models<sup>12</sup>, was used to  
36  
37 estimate the mean medical expenditure of the abovementioned four categories after adjusting for  
38  
39 confounding factors. As medical expenditure data usually involve a certain proportion of zeros and  
40  
41 some extreme values, their distribution was skewed to the right<sup>13-15</sup>. A gamma regression is the best  
42  
43 modelling approach to deal with this skewness.  
44  
45  
46  
47  
48

49 Statistical models were formulated by sex and age. Specifically, we estimated age-specific  
50  
51 medical expenditure (per year) for the following four ages: 50 years, 60 years, 70 years, and 80 years.  
52  
53 These estimated expenses were then plotted against the number of CVD risk factors. The regional  
54  
55  
56  
57  
58  
59  
60

1  
2  
3  
4  
5  
6 variation of local municipalities in Shiga prefecture was considered using the generalized estimating  
7  
8  
9 equation (GEE) approach<sup>12</sup>, which accounts for any correlation within each municipality.  
10

11  
12 To describe how the increasing number of CVD risk factors affects total medical  
13  
14 expenditure in Japan, age-adjusted mean medical expenditure and the corresponding number of  
15  
16 participants were also graphed, both for the elderly (aged 65 and over) and for the non-elderly (aged  
17  
18 40 to 64) populations. The cost ratios and overspend (excess fraction) were also calculated for each  
19  
20 CVD risk factor group. The cost ratio represents the estimated mean medical expenditure of the  
21  
22 corresponding group divided by the reference (i.e. the no CVD risk factor group), while overspend  
23  
24 was calculated as the proportion of a certain group's excess medical expenditure relative to the  
25  
26 whole population. This overspend can be interpreted as the medical expenditure that would not have  
27  
28 occurred if the participants had possessed no CVD risk factors. All statistical analysis was performed  
29  
30 using SAS release 9.20 (SAS Institute Inc., Cary, NC, USA).  
31  
32  
33  
34  
35  
36  
37  
38  
39  
40  
41  
42  
43

#### 44 **Results**

45  
46 Table 1 compares the baseline characteristics of the four CVD risk factor groups. As the  
47  
48 number of CVD risk factors increases, the means of systolic blood pressure, total cholesterol, and  
49  
50 blood glucose and the proportion of current smokers grow in both men and women. The most  
51  
52 prevalent CVD risk factors in the study participants are, first, hypertension in both men and women  
53  
54  
55  
56  
57  
58  
59  
60

1  
2  
3  
4  
5  
6 followed by smoking in men and cholesterol in women.  
7  
8

9 Figure 1 shows the age-specific estimated mean medical expenditure (per year) for each  
10 CVD risk factor group by sex and age. Most age group graphs indicate a gradual increase in medical  
11 expenditure as the number of CVD risk factors rises for both men and women. This figure shows  
12 that the mean medical expenditure (per year) for the no CVD risk factor group is just 130,000 Yen at  
13 age 50 (men: 133,413 Yen, women: 115,470 Yen), but that this expenditure is seven times higher for  
14 80-year-olds who have three or four CVD risk factors (men: 974,449 Yen, women: 906,821 Yen).  
15  
16  
17  
18  
19  
20  
21  
22  
23  
24

25 Figure 2 shows the distribution of the number of CVD risk factors and their corresponding  
26 mean medical expenditure (per year) for the four subgroups (i.e. non-elderly men, elderly men,  
27 non-elderly women, elderly women) adjusted by age. The corresponding cost ratios and overspends  
28 (excess fractions) in each group are also shown by sex and age. The adjusted mean medical  
29 expenditure increases as the number of CVD risk factors rises, meaning that the cost ratio for the  
30 group with three or four CVD risk factors increases by more than 40% relative to the reference  
31 group. These trends were most obvious in elderly women (cost ratio: 1.74). The total overspend was  
32 larger in the non-elderly population (men: 10.2%, women: 9.3%) than it was in the elderly (men:  
33 -0.7%, women: 4.7%). The total overspend was mostly driven by the groups with one (non-elderly  
34 men: 3.6%, non-elderly women: 4.9%, elderly women: 3.0%) or two risk factors (non-elderly men:  
35 5.4%, non-elderly women: 4.1%, elderly women: 1.4%) compared with three or four risk factors  
36  
37  
38  
39  
40  
41  
42  
43  
44  
45  
46  
47  
48  
49  
50  
51  
52  
53  
54  
55  
56  
57  
58  
59  
60

1  
2  
3  
4  
5  
6 (non-elderly men: 1.2%, non-elderly women: 0.3%, elderly women: 0.3%), with the exception of  
7  
8  
9 elderly men.  
10

## 11 12 13 14 15 **Discussion**

16  
17 We performed a community-based cost minimization analysis to investigate the sex- and  
18  
19 age-specific effects of CVD risk factor clustering on total medical expenditure in Japan. We  
20  
21 measured the relative increases (cost ratios) and population impacts (overspends) and found that  
22  
23 annual medical expenditure increases as the number of CVD risk factors rises in all age and sex  
24  
25 groups. While the relative increase in the group with three or four CVD risk factors was greatest, the  
26  
27 population impacts on total medical expenditure were larger among the group with one or two CVD  
28  
29 risk factors.  
30  
31  
32  
33  
34  
35  
36  
37

38 The findings from the Framingham study have already shown that Medicare costs increase  
39  
40 with combinations of risk factors, such as hypertension, smoking, and hypercholesterolemia.<sup>8</sup>  
41  
42 Studies from the United States<sup>9</sup> and Japan<sup>10,11</sup> have also shown similar increasing patterns in the  
43  
44 community setting. Our study showed that the cost ratios in the three or four CVD risk factor group  
45  
46 were between 1.44 and 1.74, which are similar to the values found in the Framingham study<sup>8</sup> and  
47  
48 another study in Japan<sup>10</sup>. However, other studies have found relatively larger ratios, such as 1.84–  
49  
50 2.45 in the United States<sup>9</sup> and 1.91 in Japan<sup>11</sup>, since medical expenditure is largely affected by the  
51  
52  
53  
54  
55  
56  
57  
58  
59  
60

1  
2  
3  
4  
5  
6 insurance system, study participants, and the region. The different characteristics of these previous  
7  
8  
9 studies, such as the definition of risk factors, length of study periods, and estimation procedures  
10  
11  
12 (statistical models), also affect their results.

13  
14  
15 The strength of our study is that the statistical modelling technique applied was suitable for  
16  
17  
18 analysing skewed medical expenditure data in contrast to a previous paper. The guideline from the  
19  
20  
21 International Society of Pharmacoeconomics and Outcome Research (ISPOR) recommended using  
22  
23  
24 this statistical model in the cost data analysis<sup>13</sup>). The cost data often show a skewed distribution,  
25  
26  
27 which violated the equidispersion property of mean and variance. In a case with a certain proportion  
28  
29  
30 of zeros, a Gamma regression is most suitable statistical model, which assumed the extra-variation  
31  
32  
33 (overdispersion) of the outcome. We applied a Gamma regression model<sup>12-15</sup> for the cost  
34  
35  
36 minimization analysis<sup>16</sup> in order to investigate in-depth sex- and age-specific attributes, which is  
37  
38  
39 difficult in a stratified analysis. Our focus on the elderly is especially important in developed  
40  
41  
42 countries, where the ageing population is increasing the proportion of the elderly, which is  
43  
44  
45 considered to be a vulnerable and sometimes frail group.

46  
47 It is important to note that individual medical expenses were highest in the three or four  
48  
49  
50 CVD risk factor group for all subgroups. This population would thus be the main target for high-risk  
51  
52  
53 approaches to contain medical expenditure growth. High-risk strategies, such as comprehensive  
54  
55  
56 health guidance by public health nurses, dieticians, or physicians, can be readily understood and they

1  
2  
3  
4  
5  
6 can strongly motivate people to change their lifestyles to manage CVD risk factors.  
7  
8

9           However, from the viewpoint of total medical expenditure, people with one or two CVD  
10 risk factors are not negligible. This population had a greater influence on total medical expenditure  
11 than did the high-CVD risk factor group, especially in the non-elderly, which accounted for 9% of  
12 total medical expenditure when the one and two CVD risk factor groups were combined compared  
13 with 4.4% for elderly women and -0.7% for elderly men. However, it is difficult to implement  
14 effective high-risk strategies because of the large population of people with one or two CVD risk  
15 factors. For this group, a population strategy may be useful for gradually lowering the distribution of  
16 CVD risk factors<sup>17</sup>.  
17  
18  
19  
20  
21  
22  
23  
24  
25  
26  
27  
28  
29  
30  
31

32           The present study has several limitations. First, details of medical diagnoses, medical  
33 treatment status (e.g. prescriptions), clinical condition such as CVD history, and cause of mortality  
34 were unavailable in this study. It is true that the medical treatment status and the clinical conditions  
35 are key elements of increasing medical expenditure. Our reference group contained both the  
36 non-prescribed (healthy population) and the prescribed. This might overestimate the “referent” mean  
37 medical expenditure. From this viewpoint, the relative measures (cost ratios) of CVD risk factors  
38 might be underestimated in this study. Second, medical expenditure was evaluated over a relatively  
39 short time period (six years) despite investigating long-term effects. As severe health events such as  
40 stroke and myocardial infarction can occur after a long interval in high-risk individuals, excess  
41  
42  
43  
44  
45  
46  
47  
48  
49  
50  
51  
52  
53  
54  
55  
56  
57  
58  
59  
60

1  
2  
3  
4  
5  
6 medical expenditure might be underestimated. Third, data on fasting blood glucose, triglycerides,  
7  
8  
9 and HDL-cholesterol were unavailable. Finally, because the public medical insurance system in  
10  
11  
12 Japan is different from those in other developed countries, we should be cautious when comparing  
13  
14  
15 the absolute values of medical expenses for participants in the present study.  
16

17  
18 In conclusion, this investigation into the sex- and age-specific effects of CVD risk factors  
19  
20 on medical expenditure in Japan showed a large relative increase in people with three or four CVD  
21  
22 risk factors. However, the population impacts on total medical expenditure were larger among  
23  
24 people with one or two CVD risk factors, especially in non-elderly women. A high-risk approach for  
25  
26 people with three or four CVD risk factors and a population approach for the majority are thus both  
27  
28  
29 necessary to reduce total medical expenditure in Japan.  
30  
31  
32  
33  
34  
35  
36  
37

### 38 **Contributors**

39  
40 YM was involved in database management, data analysis, data interpretation and wrote the  
41  
42 manuscript. TO designed the study and was involved in database management, data interpretation  
43  
44 and wrote the manuscript. KN was involved in data interpretation and writing the manuscript. KM  
45  
46  
47 was involved in data interpretation and writing the manuscript. UH was involved in data  
48  
49  
50 interpretation and writing the manuscript.  
51  
52  
53  
54

### 55 **Funding**



1  
2  
3  
4  
5  
6 This research was supported by a Grant-in-Aid for Scientific Research (C) from the Japan Society  
7  
8  
9 for the Promotion of Science (22590585) and Grants-in-Aid from the Ministry of Health, Labor and  
10  
11  
12 Welfare, Health and Labor Sciences Research Grants, Japan (Research on Health Services:  
13  
14  
15 H17-Kenkou-007; Comprehensive Research on Cardiovascular and Life-Style Related Diseases:  
16  
17  
18 H18-Junkankitou [Seishuu]-Ippan-012; Comprehensive Research on Cardiovascular and Life-Style  
19  
20  
21 Related Diseases: H20-Junkankitou [Seishuu]-Ippan-013; Comprehensive Research on Life-Style  
22  
23  
24 Related Diseases including Cardiovascular Diseases and Diabetes Mellitus: H20-Junkankitou  
25  
26  
27 [Seishuu]-Ippan-013 and Comprehensive Research on Life-Style Related Diseases including  
28  
29  
30 Cardiovascular Diseases and Diabetes Mellitus: H23-Junkankitou [Seishuu]-Ippan-005).

### 31 32 **Competing interests**

33  
34  
35 None

### 36 37 38 **Ethics approval**

39  
40  
41 Medical research ethics committee approval was granted by the Shiga University of Health Science  
42  
43  
44 Research Ethics Committee (17-20-1).

### 45 46 47 **Provenance and peer review**

48  
49  
50 Not commissioned; externally peer reviewed.

### 51 52 53 **Data sharing statement**

54  
55  
56 No additional data are available.

## References

1. Ezzati M, Hoorn SV, Rodgers A, Lopez AD, Mathers CD, Murray CJ; Comparative Risk Assessment Collaborating Group. Estimates of global and regional potential health gains from reducing multiple major risk factors. *Lancet* 2003;362:271–80.
2. Greenland P, Knoll MD, Stamler J, Neaton JD, Dyer AR, Garside DB, Wilson PW. Major risk factors as antecedents of fatal and nonfatal coronary heart disease events. *JAMA* 2003;290:891–7.
3. Kadota A, Hozawa A, Okamura T, Kadowak T, Nakamura K, Murakami Y, Hayakawa T, Kita Y, Okayama A, Nakamura Y, Kashiwagi A, Ueshima H; NIPPON DATA Research Group. Relationship between metabolic risk factor clustering and cardiovascular mortality stratified by high blood glucose and obesity: NIPPON DATA90, 1990–2000. *Diabetes Care* 2007;30:1533–8.
4. McNeill AM, Rosamond WD, Girman CJ, Golden SH, Schmidt MI, East HE, Ballantyne CM, Heiss G. The metabolic syndrome and 11-year risk of incident cardiovascular disease in the atherosclerosis risk in communities study. *Diabetes Care* 2005;28:385–90.
5. Nakamura K, Okamura T, Kanda H, Hayakawa T, Okayama A, Ueshima H; Health Promotion Research Committee of the Shiga National Health Insurance Organizations. Medical costs of patients with hypertension and/or diabetes: A 10-year follow-up study of National Health

- 1  
2  
3  
4  
5  
6 Insurance in Shiga, Japan. *J Hypertens* 2006;24:2305–9.  
7  
8  
9 6. Izumi Y, Tsuji I, Ohkubo T, Kuwahara A, Nishino Y, Hisamichi S Impact of smoking habit on  
10  
11 medical care use and its costs: a prospective observation of National Health Insurance  
12  
13 beneficiaries in Japan. *Int J Epidemiol.* 2001;30:616–21  
14  
15  
16  
17 7. Daviglius ML, Liu K, Yan LL, et al. Relation of body mass index in young adulthood and middle  
18  
19 age to Medicare expenditures in older age. *JAMA.* 2004;292:2743–9.  
20  
21  
22  
23 8. Schauffler HH, D’Agostino RB, Kannel WB. Risk for cardiovascular disease in the elderly and  
24  
25 associated Medicare costs: The Framingham Study. *Am J Prev Med* 1993;9:146–54.  
26  
27  
28  
29 9. Daviglius ML, Liu K, Greenland P, Dyer AR, Garside DB, Manheim L, et al. Benefit of a  
30  
31 favorable cardiovascular risk-factor profile in middle age with respect to Medicare costs. *N Engl*  
32  
33 *J Med* 1998;339:1122–9.  
34  
35  
36  
37  
38 10. Okamura T, Nakamura K, Kanda H, et al. Effect of combined cardiovascular risk factors on  
39  
40 individual and population medical expenditures – A 10-year cohort study of national health  
41  
42 insurance in a Japanese population. *Circ J* 2007;71:807–13  
43  
44  
45  
46 11. Ohmori-Matsuda K, Kuriyama S, Hozawa A, Nakaya N, Shimazu T, Tsuji I. The joint impact of  
47  
48 cardiovascular risk factors upon medical costs. *Prev Med.* 2007;44:349–55.  
49  
50  
51  
52 12. Fitzmaurice GM, Laird NM, Ware JH. Applied Longitudinal Analysis Second Edition. New  
53  
54  
55 Jersey: John Wiley & Sons, 2011.  
56  
57  
58  
59  
60

- 1  
2  
3  
4  
5  
6 13. Ramsey S, Willke R, Briggs A et al. Good research practices for cost-effectiveness analysis  
7  
8  
9 alongside clinical trials: the ISPOR RCT-CEA Task Force report. *Value Health*. 2005;8:521–33.  
10  
11  
12 14. Basu A, Manning WG. Issues for the next generation of health care cost analyses. *Med Care*.  
13  
14 2009;7 (Suppl 1):S109–14.  
15  
16  
17 15. Manning WG, Basu A, Mullahy J. Generalized modeling approaches to risk adjustment of  
18  
19 skewed outcomes data. *J Health Econ*. 2005;24:465–88.  
20  
21  
22 16. Glick HA, Doshi JA, Sonnad SS, Polsky D. *Economic Evaluation in Clinical Trials*. New York:  
23  
24 Oxford University Press, 2007.  
25  
26  
27  
28 17 · Rose G. Sick individuals and sick populations. *Int J Epidemiol* 1985;14:32–8.  
29  
30  
31  
32  
33  
34  
35  
36  
37  
38  
39  
40  
41  
42  
43  
44  
45  
46  
47  
48  
49  
50  
51  
52  
53  
54  
55  
56  
57  
58  
59  
60

Table 1. The baseline characteristics of study participants, Shiga prefectural follow-up study of medical expenditure, 2000–2006

|                        | Number of cardiovascular risk factors* |                        |                      |                    |      |    |     |      |    |        |      |     |     |
|------------------------|----------------------------------------|------------------------|----------------------|--------------------|------|----|-----|------|----|--------|------|-----|-----|
|                        | 0                                      |                        |                      | 1                  |      |    | 2   |      |    | 3 or 4 |      |     |     |
|                        | Men:4890; women:11,737                 | Men:6892, women:10,520 | Men:2337, women:2362 | Men:262, women:114 | Mean | SD | %** | Mean | SD | %**    | Mean | SD  | %** |
| Men                    |                                        |                        |                      |                    |      |    |     |      |    |        |      |     |     |
| Age                    | 70                                     | 11                     | -                    | 68                 | 11   | -  | 67  | 10   | -  | 65     | 10   | -   |     |
| Systolic blood pressur | 123                                    | 11                     | 0                    | 138                | 19   | 54 | 148 | 17   | 87 | 151    | 14   | 96  |     |
| Total cholestrol       | 187                                    | 28                     | 0                    | 191                | 31   | 5  | 201 | 41   | 23 | 231    | 41   | 65  |     |
| Blood glucose          | 104                                    | 24                     | 0                    | 107                | 30   | 1  | 118 | 51   | 8  | 187    | 95   | 49  |     |
| Current smokers        | -                                      | -                      | 0                    | -                  | -    | 39 | -   | -    | 82 | -      | -    | 94  |     |
| Women                  |                                        |                        |                      |                    |      |    |     |      |    |        |      |     |     |
| Age                    | 66                                     | 11                     | -                    | 69                 | 10   | -  | 68  | 10   | -  | 66     | 10   | -   |     |
| Systolic blood pressur | 122                                    | 12                     | 0                    | 143                | 18   | 70 | 150 | 16   | 92 | 155    | 15   | 100 |     |
| Total cholestrol       | 199                                    | 25                     | 0                    | 214                | 34   | 23 | 248 | 33   | 80 | 260    | 28   | 91  |     |
| Blood glucose          | 98                                     | 19                     | 0                    | 102                | 27   | 1  | 114 | 50   | 8  | 174    | 93   | 44  |     |
| Current smokers        | -                                      | -                      | 0                    | -                  | -    | 7  | -   | -    | 20 | -      | -    | 68  |     |

\* The four CVD risk factors analysed in this study were defined as follows: hypertension (systolic blood pressure $\geq$ 140 mmHg or diastolic blood pressure $\geq$ 90 mmHg), hypercholesterolemia (total cholesterol $\geq$ 240 mg/dl), high blood glucose (casual blood glucose $\geq$ 200 mg/dl), and smoking (current smoker).

\*\* For each CVD risk factor, the proportions (%) of participants who possess this risk factor are shown in each category.

### Figure legends

Figure 1. The age- and sex-specific estimated mean medical expenditure (per year) by CVD risk factor group.

The Gamma regression was used to estimate the mean medical expenditure in the model. The black rectangles show the mean medical expenditure (per year) of each CVD risk factor group and the corresponding solid lines show their 95% confidence intervals.

Figure 2. The distribution of the number of CVD risk factors, their estimated mean medical expenditure (per year), and overspend in the population: (A) men aged 40 to 64, (B) men aged 65 and over, (C) women aged 40 to 64, and (D) women aged 65 and over.

The Gamma regression was used to estimate the mean medical expenditure in the model. The overspend is the difference between the expenditure of each category and the reference (i.e. the no CVD risk factor group). This was defined as the proportion of excess expenditure relative to total medical expenditure.

1  
2  
3  
4  
5  
6  
7  
8  
9  
10  
11  
12  
13  
14  
15  
16  
17  
18  
19  
20  
21  
22  
23  
24  
25  
26  
27  
28  
29  
30  
31  
32  
33  
34  
35  
36  
37  
38  
39  
40  
41  
42  
43

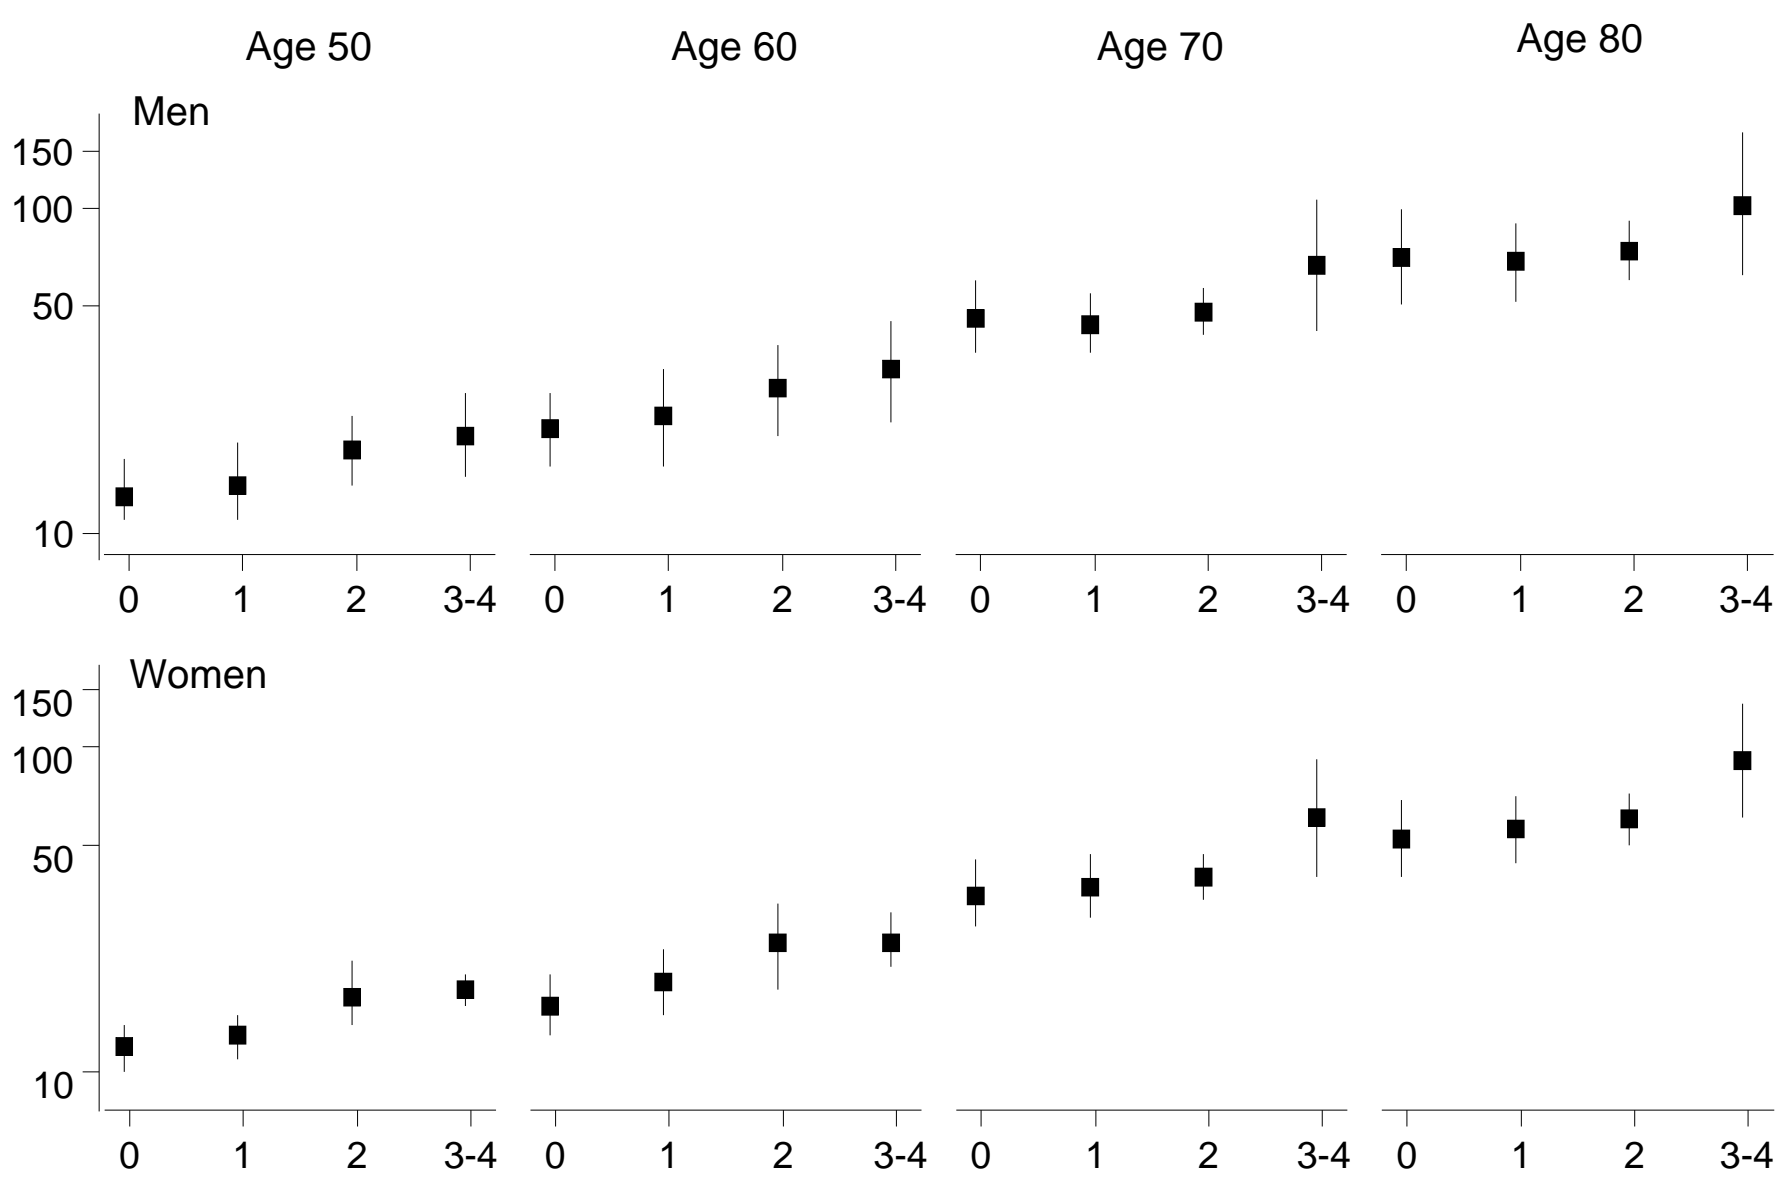

1  
2  
3  
4  
5  
6  
7  
8  
9  
10  
11  
12  
13  
14  
15  
16  
17  
18  
19  
20  
21  
22  
23  
24  
25  
26  
27  
28  
29  
30  
31  
32  
33  
34  
35  
36  
37  
38  
39  
40  
41  
42  
43



|                     |                 |      |      |      |
|---------------------|-----------------|------|------|------|
| Ratio               | 1.0 (reference) | 1.07 | 1.32 | 1.52 |
| Excess fraction (%) |                 | 3.6  | 5.4  | 1.2  |

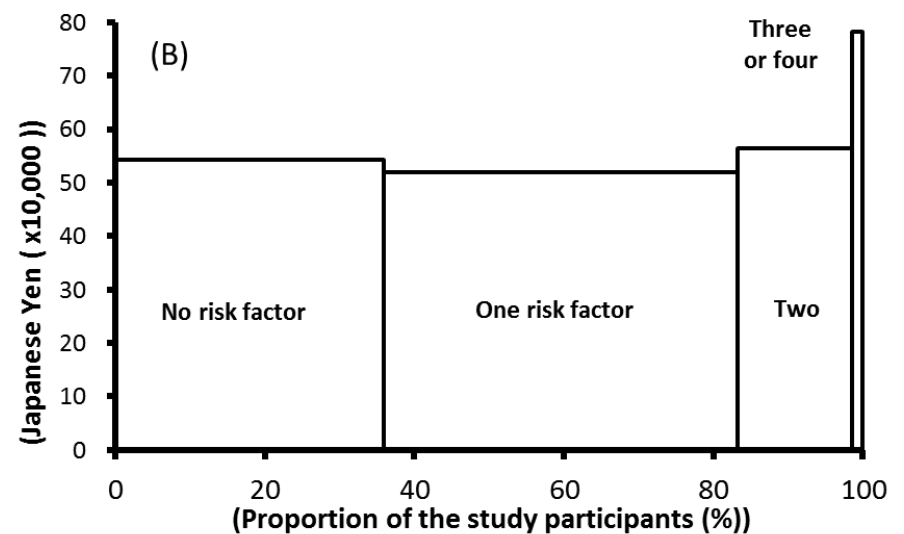

|                     |                 |      |      |      |
|---------------------|-----------------|------|------|------|
| Ratio               | 1.0 (reference) | 0.96 | 1.04 | 1.44 |
| Excess fraction (%) |                 | -2.0 | 0.6  | 0.7  |



|                     |                 |      |      |      |
|---------------------|-----------------|------|------|------|
| Ratio               | 1.0 (reference) | 1.15 | 1.51 | 1.54 |
| Excess fraction (%) |                 | 4.9  | 4.1  | 0.3  |

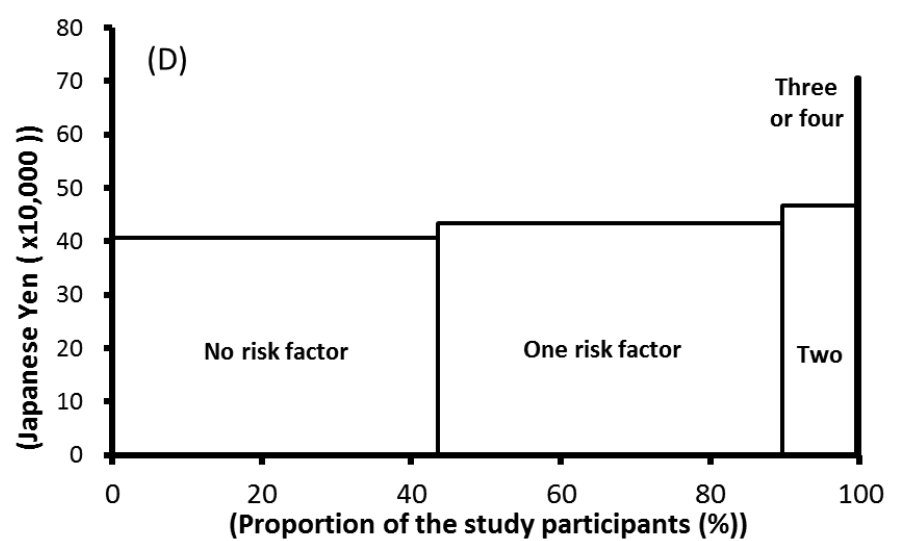

|                     |                 |      |      |      |
|---------------------|-----------------|------|------|------|
| Ratio               | 1.0 (reference) | 1.07 | 1.15 | 1.74 |
| Excess fraction (%) |                 | 3.0  | 1.4  | 0.3  |



**Additional file 1**

EVEREST Statement: Checklist for health economics paper

|                                                                                                                                                | <b>Study section</b>     | <b>Additional remarks</b> |
|------------------------------------------------------------------------------------------------------------------------------------------------|--------------------------|---------------------------|
| <b>Study design</b>                                                                                                                            |                          |                           |
| (1) The research question is stated                                                                                                            | Introduction             |                           |
| (2) The economic importance of the research question is stated                                                                                 | Introduction             |                           |
| (3) The viewpoint(s) of the analysis are clearly stated and justified                                                                          | Methods                  |                           |
| (4) The rationale for choosing the alternative programmes or interventions compared is stated                                                  | Introduction and Methods |                           |
| (5) The alternatives being compared are clearly described                                                                                      | Introduction and Methods |                           |
| (6) The form of economic evaluation used is stated                                                                                             | Introduction and Methods |                           |
| (7) The choice of form of economic evaluation is justified in relation to the questions addressed                                              | Introduction and Methods |                           |
|                                                                                                                                                |                          |                           |
| <b>Data collection</b>                                                                                                                         |                          |                           |
| (8) The source(s) of effectiveness estimates used are stated                                                                                   | Methods                  |                           |
| (9) Details of the design and results of effectiveness study are given (if based on single study)                                              | Methods                  |                           |
| (10) Details of the method of synthesis or meta-analysis of estimates are given (if based on an overview of a number of effectiveness studies) | N/A                      |                           |
| (11) The primary outcome measure(s) for the economic evaluation are clearly stated                                                             | Methods                  |                           |
| (12) Methods to value health states and other benefits are stated                                                                              | N/A                      |                           |
| (13) Details of the subjects from whom valuations were obtained are given                                                                      | N/A                      |                           |
| (14) Productivity changes (if included) are reported separately                                                                                | N/A                      |                           |
| (15) The relevance of productivity changes to the study question is discussed                                                                  | N/A                      |                           |
| (16) Quantities of resources are reported separately from their unit costs                                                                     | Methods                  |                           |
| (17) Methods for the estimation of quantities and unit costs are described                                                                     | Methods                  |                           |
| (18) Currency and price data are recorded                                                                                                      | Methods                  |                           |
| (19) Details of currency of price adjustments for inflation or currency conversion are given                                                   | N/A                      |                           |

|                                                                                          |                   |  |
|------------------------------------------------------------------------------------------|-------------------|--|
| (20) Details of any model used are given                                                 | Methods           |  |
| (21) The choice of model used and the key parameters on which it is based are justified  | Methods           |  |
|                                                                                          |                   |  |
| <b>Analysis and interpretation of results</b>                                            |                   |  |
| (22) Time horizon of costs and benefits is stated                                        | Methods           |  |
| (23) The discount rate(s) is stated                                                      | N/A               |  |
| (24) The choice of rate(s) is justified                                                  | N/A               |  |
| (25) An explanation is given if costs or benefits are not discounted                     | N/A               |  |
| (26) Details of statistical tests and confidence intervals are given for stochastic data | Methods           |  |
| (27) The approach to sensitivity analysis is given                                       | N/A               |  |
| (28) The choice of variables for sensitivity analysis is justified                       | N/A               |  |
| (29) The ranges over which the variables are varied are stated                           | N/A               |  |
| (30) Relevant alternatives are compared                                                  | Methods           |  |
| (31) Incremental analysis is reported                                                    | N/A               |  |
| (32) Major outcomes are presented in a disaggregated as well as aggregated form          | Table and Figures |  |
| (33) The answer to the study question is given                                           | Discussion        |  |
| (34) Conclusions follow from the data reported                                           | Discussion        |  |
| (35) Conclusions are accompanied by the appropriate caveats                              | Discussion        |  |

1  
2  
3  
4  
5  
6  
7  
8  
9  
10  
11 **The clustering of cardiovascular disease risk factors and their impacts on annual medical**  
12  
13  
14 **expenditure in Japan: community-based cost minimization analysis using Gamma regression**  
15  
16 **models**  
17  
18  
19  
20

21 Yoshitaka Murakami, Tomonori Okamura, Koshi Nakamura, Katsuyuki Miura, Hirotsugu Ueshima  
22  
23

24  
25  
26  
27 Yoshitaka Murakami associate professor Department of Medical Statistics, Shiga University of  
28  
29 Medical Science, Seta Tsukinowa-cho, Otsu, Shiga 520-2192, Japan Tomonori Okamura professor  
30  
31 Department of Preventive Medicine and Public Health, Keio University, Shinano-machi 35,  
32  
33 Shinjuku-ku, Tokyo 160-8582, Japan Koshi Nakamura associate professor Department of  
34  
35 Epidemiology and Public Health, Kanazawa Medical University, 1-1 Daigaku, Uchinada, Ishikawa  
36  
37 920-0293, Japan Katsuyuki Miura professor Department of Health Science, Shiga University of  
38  
39 Medical Science, Otsu, Seta Tsukinowa-cho, Otsu, Shiga 520-2192, Japan Hirotsugu Ueshima  
40  
41 professor Lifestyle-related Disease Prevention Centre, Shiga University of Medical Science, Seta  
42  
43 Tsukinowa-cho, Otsu, Shiga 520-2192, Otsu, Japan Department of Health Science, Shiga University  
44  
45 of Medical Science, Otsu, Japan  
46  
47  
48  
49  
50  
51  
52  
53  
54  
55

Correspondence to: Y Murakami ymura@belle.shiga-med.ac.jp

## Abstract

**Objective** The clustering of cardiovascular disease (CVD) risk factors is a serious threat to a population health. This detrimental effect also increases medical expenses, especially for the elderly population. The ~~present~~-age-specific ~~investigation into~~quantitative assessment of the medical expenditure, especially focused on the elderly, is thus indispensable for formulating public health policy given the extent of the ageing population in developed countries.

**Design** Cost minimization analysis using individuals' medical expenses and their corresponding health examination measures.

**Setting** Shiga prefecture, Japan, from April 2000 to March 2006.

**Participants** 39,114 participants aged 40 years and over.

**Main outcome measures** Mean ~~annual~~-medical expenditure per year.

**Methods** Gamma regression models were applied to examine how the number of CVD risk factors affects ~~annual~~mean medical expenditure. The four CVD risk factors analysed in this study were defined as follows: hypertension (systolic blood pressure $\geq$ 140 mmHg or diastolic blood pressure $\geq$ 90 mmHg), hypercholesterolemia (serum total cholesterol $\geq$ 240 mg/dl), high blood glucose (casual blood glucose $\geq$ 200 mg/dl), and smoking (current smoker). Sex- and age-specific investigations were

Formatted: Underline

Formatted: Underline

Formatted: Underline

Formatted: Underline

1  
2  
3  
4  
5  
6  
7  
8  
9 carried out on the elderly (aged 65 and over) and non-elderly (aged 40 to 64) populations.

10  
11 **Results** The mean ~~annual~~-medical expenditure (per year) for the no CVD risk factor group was only  
12  
13  
14 130,000 Yen at age 50 (men: 133,413 Yen, women: 115,470 Yen), but this expenditure was seven  
15  
16 times higher for 80-year-olds who have three or four CVD risk factors (men: 974,449 Yen, women:  
17  
18 906,821 Yen). The total overspend (excess fraction) was larger for the non-elderly (men: 10.2%,  
19  
20 women: 9.3%) than for the elderly (men: -0.7%, women: 4.7%) and largely driven by people with  
21  
22 one or two CVD risk factors, except for elderly men.  
23  
24  
25

26  
27 **Conclusion** ~~A~~Our quantitative assessments showed that a high-risk approach for the elderly and a  
28  
29 population approach for the majority are both necessary to reduce total medical expenditure in  
30  
31 Japan.  
32  
33

34 **Keywords:** Cost minimization analysis, Cardiovascular disease risk factor, Medical expenditure,  
35  
36 Japan, Elderly population  
37  
38  
39  
40  
41

#### 42 **Article Focus**

43  
44 >Cardiovascular disease risk factors are often clustered in an individual, which seriously increases  
45  
46 the likelihood of suffering from cardiovascular disease and this clustering of risk factors also  
47  
48 increases medical expenses.  
49  
50

51  
52 > The present study examined how age- and sex-specific trends influence total medical expenditure  
53  
54

1  
2  
3  
4  
5  
6  
7  
8  
9 and assessed how the clustering of CVD risk factors affects the Japanese population.

### 11 **Key Messages**

12  
13  
14 >The total overspend of annual medical expenditure is larger for the non-elderly than for the elderly  
15  
16 in Japan.

17  
18  
19 >Larger medical overspends were driven by the groups with one or two risk factors as opposed to  
20  
21 those with three or four risk factors, except for elderly men.

### 22 **Strengths and Limitations of This Study**

23  
24  
25  
26  
27 >The statistical modelling technique which we applied was suitable for analysing skewed medical  
28  
29 expenditure data in contrast to a previous paper.

30  
31  
32 >Our focus on the elderly, which is considered to be a vulnerable and sometimes frail group, is  
33  
34 especially important in developed countries where the proportion of the elderly is increasing.

35  
36  
37 >The medical expenditure was evaluated over a relatively short time period (six years) despite  
38  
39 investigating long-term effects, such as stroke and myocardial infarction.

### 40 **Introduction**

41  
42  
43  
44  
45  
46  
47 Hypertension, dyslipidemia, diabetes, and smoking are well-established risk factors for  
48  
49 cardiovascular disease (CVD), and the damage caused by these factors is widespread across the  
50  
51 developed world.<sup>1</sup> However, it is also well recognized in the literature that a combination of these  
52  
53  
54

1  
2  
3  
4  
5  
6  
7  
8  
9 risk factors in an individual increases the risk of CVD.<sup>2</sup> For example, several studies have shown  
10  
11 that the clustering of metabolic risk factors more than doubles the likelihood of CVD mortality.<sup>3,4</sup>  
12  
13 Moreover, from a health economics perspective, these individual CVD risk factors<sup>5-7</sup> and their  
14  
15 combination<sup>8-11</sup> have also been reported to increase total medical expenditure in developed countries.  
16  
17  
18 Indeed, the public health sectors in many western nations are now facing considerable challenges  
19  
20 because of such spiralling medical expenses.  
21  
22

23  
24 From a financial viewpoint, the elderly population (persons aged 65 and over) is the  
25  
26 greatest consumer of medical resources. However, even though it is clear that individual medical  
27  
28 bills differ by age group, few studies have investigated age-specific medical expenses because of  
29  
30 methodological issues, such as insufficient sample sizes and inappropriate statistical models. To help  
31  
32 bridge this gap in the body of knowledge on this topic, a comprehensive community-based database  
33  
34 for medical expenditure, which includes approximately 60,000 individuals, has been developed in  
35  
36 Shiga, Japan. This database consists of individuals' health examinations and their medical expenses  
37  
38 over a three- to five-year period. Exploring this database allows us to perform an age-specific cost  
39  
40 minimization analysis using Gamma regression models, especially for the elderly population. The  
41  
42 present study thus ~~examines how~~conducted the age- and sex-specific ~~trends influence~~quantitative  
43  
44 ~~assessments of~~ total medical expenditure and ~~assesses~~examines how the clustering of CVD risk  
45  
46 factors affects the Japanese population.  
47  
48  
49  
50  
51  
52  
53  
54

## Methods

### The medical expenditure system in Japan

The payment of medical expenses in Japan is based on a public medical insurance institution that comprises two systems. Since 1961, all Japan residents have been required to enroll in one of these two insurance systems under the so-called 'health insurance for all' scheme. First, the National Health Insurance (NHI) scheme covers self-employed workers (e.g. farmers, fishers, shopkeepers), retirees, and their dependents. The elderly in Japan are thus most often covered by the NHI scheme. The other insurance system (e.g. Health Insurance Society, Mutual Aid Association) covers company employees and their dependents. These two systems cover 65.3% and 34.7% of the Japanese population, respectively. All charges are strictly controlled by a service-specific fee schedule set by the national government that is constant regardless of insurance system or health institution.

### Study population and data

The comprehensive dataset used in this study comprised 64,450 NHI beneficiaries in Shiga prefecture in central Japan. Data on medical expenses and annual health examinations are both key components of this database. Medical expenses data were collected from the database of the Shiga Health Insurance Organization, which is a local branch of the NHI. The original database provides



1  
2  
3  
4  
5  
6  
7  
8  
9 data from April 2000 to March 2006. For the economic evaluation, we ~~calculated~~used a mean ~~annual~~  
10 medical expenditure ~~as the sum of monthly~~(per year), which was calculated by summing all medical  
11 expenditure ~~throughout the observation periods and~~ divided by the total ~~periods of~~  
12 ~~observation~~observation periods of months. This monthly-based measure is multiplied twelve to  
13 ~~transform a mean medical expenditure~~ (per year). The data of an annual health examination were  
14  
15  
16  
17  
18  
19  
20 provided from every local municipality of Shiga prefecture. In Japan, an annual health examination  
21  
22 was free of charge or inexpensive for all Japanese, which is entitled by the law (Act on Assurance of  
23  
24 Medical Care for Elderly People). Those data were appropriately stored with security protections in  
25  
26 every local municipality. Data on annual health examinations from April 2000, which included the  
27  
28 baseline information for our study, were provided from all 26 local municipalities in Shiga  
29  
30 prefecture. Both medical expenses and health examination measures were merged into the database  
31  
32 using individual identification information (i.e. name, sex, and date of birth) for the administrative  
33  
34 use. This merging process was conducted by the Shiga Health Insurance Organization, the public  
35  
36 agency for paying insurance ~~in Shiga~~. The anonymous dataset were extracted from the database and  
37  
38 then, participants who displayed signs of blood pressure, serum total cholesterol, casual blood  
39  
40 glucose, and smoking habits (see next subsection) were included in the analysis (n=31,119). Medical  
41  
42 research ethics committee approval was granted by the Shiga University of Health Science Research  
43  
44 Ethics Committee (17-20-1).  
45  
46  
47  
48  
49  
50  
51  
52  
53  
54

## Statistical analysis

Specifically, the four CVD risk factors analysed in this study were defined as follows: hypertension (systolic blood pressure  $\geq 140$  mmHg or diastolic blood pressure  $\geq 90$  mmHg), hypercholesterolemia (serum total cholesterol  $\geq 240$  mg/dl), high blood glucose (casual blood glucose  $\geq 200$  mg/dl), and smoking (current smoker). All participants were classified into four categories (i.e. none, one, two, and three or four) based on these four CVD risk factors. The unit of medical expenditure was set as Japanese Yen (i.e. 100 Japanese yen (JPY) = 0.81 pounds (GBP), at the exchange rates published on 10 August 2012).

Because data on individual medical expenses differed by the period of subscription to the NHI, individual medical expenses were divided by these periods of subscription and expressed as the mean expenses per year of follow-up. If a beneficiary withdrew from the NHI or died, follow-up was stopped at that point. Follow-up was restarted for beneficiaries who withdrew and then re-enrolled in the NHI.

A gamma regression model, which is a member of generalized linear models<sup>12</sup>, was used to estimate the mean ~~annual~~ medical expenditure of the abovementioned four categories after adjusting for confounding factors. As medical expenditure data usually involve a ~~substantial~~certain proportion of zeros and some extreme values, their distribution was skewed to the right<sup>13-15</sup>. A gamma regression is the best modelling approach to deal with this skewness.

1  
2  
3  
4  
5  
6  
7  
8  
9 Statistical models were formulated by sex and age. Specifically, we estimated age-specific  
10  
11 ~~annual~~-medical expenditure (per year) for the following four ages: 50 years, 60 years, 70 years, and  
12  
13  
14 80 years. These estimated expenses were then plotted against the number of CVD risk factors. The  
15  
16 regional variation of local municipalities in Shiga prefecture was considered using the generalized  
17  
18 estimating equation (GEE) approach<sup>12</sup>, which accounts for any correlation within each municipality.  
19  
20

21  
22 To describe how the increasing number of CVD risk factors affects total medical  
23  
24 expenditure in Japan, age-adjusted mean ~~annual~~-medical expenditure and the corresponding number  
25  
26 of participants were also graphed, both for the elderly (aged 65 and over) and for the non-elderly  
27  
28 (aged 40 to 64) populations. The cost ratios and overspend (excess fraction) were also calculated for  
29  
30 each CVD risk factor group. The cost ratio represents the estimated ~~annual~~mean medical expenditure  
31  
32 of the corresponding group divided by the reference (i.e. the no CVD risk factor group), while  
33  
34 overspend was calculated as the proportion of a certain group's excess medical expenditure relative  
35  
36 to the whole population. This overspend can be interpreted as the medical expenditure that would not  
37  
38 have occurred if the participants had possessed no CVD risk factors. All statistical analysis was  
39  
40 performed using SAS release 9.20 (SAS Institute Inc., Cary, NC, USA).  
41  
42  
43  
44  
45  
46  
47  
48  
49

## 50 Results

51  
52 Table 1 compares the baseline characteristics of the four CVD risk factor groups. As the  
53  
54

1  
2  
3  
4  
5  
6  
7  
8  
9 number of CVD risk factors increases, the means of systolic blood pressure, total cholesterol, and  
10  
11 blood glucose and the proportion of current smokers grow in both men and women. The most  
12  
13 prevalent CVD risk factors in the study participants are, first, hypertension in both men and women  
14  
15 followed by smoking in men and cholesterol in women.  
16  
17

18  
19 Figure 1 shows the age-specific estimated ~~annual~~mean medical expenditure (per year) for  
20  
21 each CVD risk factor group by sex and age. Most age group graphs indicate a gradual increase in  
22  
23 medical expenditure as the number of CVD risk factors rises for both men and women. This figure  
24  
25 shows that the mean ~~annual~~medical expenditure (per year) for the no CVD risk factor group is just  
26  
27 130,000 Yen at age 50 (men: 133,413 Yen, women: 115,470 Yen), but that this expenditure is seven  
28  
29 times higher for 80-year-olds who have three or four CVD risk factors (men: 974,449 Yen, women:  
30  
31 906,821 Yen).  
32  
33  
34  
35  
36

37  
38 Figure 2 shows the distribution of the number of CVD risk factors and their corresponding  
39  
40 mean ~~annual~~medical expenditure (per year) for the four subgroups (i.e. non-elderly men, elderly  
41  
42 men, non-elderly women, elderly women) adjusted by age. The corresponding cost ratios and  
43  
44 overspends (excess fractions) in each group are also shown by sex and age. The adjusted  
45  
46 ~~annual~~mean medical expenditure increases as the number of CVD risk factors rises, meaning that the  
47  
48 cost ratio for the group with three or four CVD risk factors increases by more than 40% relative to  
49  
50 the reference group. These trends were most obvious in elderly women (cost ratio: 1.74). The total  
51  
52  
53  
54

1  
2  
3  
4  
5  
6  
7  
8  
9 overspend was larger in the non-elderly population (men: 10.2%, women: 9.3%) than it was in the  
10 elderly (men: -0.7%, women: 4.7%). The total overspend was mostly driven by the groups with one  
11  
12  
13 (non-elderly men: 3.6%, non-elderly women: 4.9%, elderly women: 3.0%) or two risk factors  
14  
15  
16 (non-elderly men: 5.4%, non-elderly women: 4.1%, elderly women: 1.4%) compared with three or  
17  
18  
19 four risk factors (non-elderly men: 1.2%, non-elderly women: 0.3%, elderly women: 0.3%), with the  
20  
21  
22 exception of elderly men.  
23  
24  
25  
26

## 27 Discussion

28  
29 We performed a community-based cost minimization analysis to investigate the sex- and  
30  
31  
32 age-specific effects of CVD risk factor clustering on total medical expenditure in Japan. We  
33  
34  
35 measured the relative increases (cost ratios) and population impacts (overspends) and found that  
36  
37  
38 annual medical expenditure increases as the number of CVD risk factors rises in all age and sex  
39  
40  
41 groups. While the relative increase in the group with three or four CVD risk factors was greatest, the  
42  
43  
44 population impacts on total medical expenditure were larger among the group with one or two CVD  
45  
46  
47 risk factors.  
48  
49

50 The findings from the Framingham study have already shown that Medicare costs increase  
51  
52 with combinations of risk factors, such as hypertension, smoking, and hypercholesterolemia.<sup>8</sup>

53 Studies from the United States<sup>9</sup> and Japan<sup>10,11</sup> have also shown similar increasing patterns in the  
54  
55

1  
2  
3  
4  
5  
6  
7  
8  
9 community setting. Our study showed that the cost ratios in the three or four CVD risk factor group  
10  
11 were between 1.44 and 1.74, which are similar to the values found in the Framingham study<sup>8</sup> and  
12  
13 another study in Japan<sup>10</sup>. However, other studies have found relatively larger ratios, such as 1.84–  
14  
15 2.45 in the United States<sup>9</sup> and 1.91 in Japan<sup>11</sup>, since medical expenditure is largely affected by the  
16  
17 insurance system, study participants, and the region. The different characteristics of these previous  
18  
19 studies, such as the definition of risk factors, length of study periods, and estimation procedures  
20  
21 (statistical models), also affect their results.  
22  
23  
24  
25

26  
27 The strength of our study is that the statistical modelling technique applied was suitable for  
28  
29 analysing skewed medical expenditure data in contrast to a previous paper. [The guideline from the](#)  
30  
31 [International Society of Pharmacoeconomics and Outcome Research \(ISPOR\) recommended using](#)  
32  
33 [this statistical model in the cost data analysis<sup>13</sup>](#). [The cost data often show a skewed distribution,](#)  
34  
35 [which violated the equidispersion property of mean and variance. In a case with a certain proportion](#)  
36  
37 [of zeros, a Gamma regression is most suitable statistical model, which assumed the extra-variation](#)  
38  
39 [\(overdispersion\) of the outcome.](#) We applied a Gamma regression model<sup>12–15</sup> for the cost  
40  
41 minimization analysis<sup>16</sup> in order to investigate in-depth sex- and age-specific attributes, which is  
42  
43 difficult in a stratified analysis. Our focus on the elderly is especially important in developed  
44  
45 countries, where the ageing population is increasing the proportion of the elderly, which is  
46  
47 considered to be a vulnerable and sometimes frail group.  
48  
49  
50  
51  
52  
53  
54

1  
2  
3  
4  
5  
6  
7  
8  
9 It is important to note that individual medical expenses were highest in the three or four  
10 CVD risk factor group for all subgroups. This population would thus be the main target for high-risk  
11 approaches to contain medical expenditure growth. High-risk strategies, such as comprehensive  
12 health guidance by public health nurses, dieticians, or physicians, can be readily understood and they  
13 can strongly motivate people to change their lifestyles to manage CVD risk factors.  
14  
15  
16  
17  
18  
19  
20

21 However, from the viewpoint of total medical expenditure, people with one or two CVD  
22 risk factors are not negligible. This population had a greater influence on total medical expenditure  
23 than did the high-CVD risk factor group, especially in the non-elderly, which accounted for 9% of  
24 total medical expenditure when the one and two CVD risk factor groups were combined compared  
25 with 4.4% for elderly women and -0.7% for elderly men. However, it is difficult to implement  
26 effective high-risk strategies because of the large population of people with one or two CVD risk  
27 factors. For this group, a population strategy may be useful for gradually lowering the distribution of  
28 CVD risk factors<sup>17</sup>.  
29  
30  
31  
32  
33  
34  
35  
36  
37  
38  
39  
40

41  
42 The present study has several limitations. ~~First, because the public medical insurance~~  
43 ~~system in Japan is different from those in other developed countries, we should be cautious when~~  
44 ~~comparing the absolute values of medical expenses for participants in the present study.~~First, details  
45 of medical diagnoses, medical treatment status (e.g. prescriptions), clinical condition such as CVD  
46 history, and cause of mortality were unavailable in this study. It is true that the medical treatment  
47  
48  
49  
50  
51  
52  
53  
54

1  
2  
3  
4  
5  
6  
7  
8  
9 status and the clinical conditions are key elements of increasing medical expenditure. Our reference  
10 group contained both the non-prescribed (healthy population) and the prescribed. This might  
11 overestimate the “referent” mean medical expenditure. From this viewpoint, the relative measures  
12 (cost ratios) of CVD risk factors might be underestimated in this study. Second, medical expenditure  
13  
14 was evaluated over a relatively short time period (six years) despite investigating long-term effects.  
15  
16  
17  
18  
19  
20  
21  
22 As severe health events such as stroke and myocardial infarction can occur after a long interval in  
23  
24 high-risk individuals, excess medical expenditure might be underestimated. Third, data on fasting  
25  
26 blood glucose, triglycerides, and HDL-cholesterol were unavailable. ~~Finally, details of medical~~  
27 ~~diagnoses, medical treatment status (e.g. prescriptions), clinical condition such as CVD history, and~~  
28 ~~cause of mortality were unavailable. Thus, further studies are required to clarify the effects of these~~  
29 ~~variables~~ Finally, because the public medical insurance system in Japan is different from those in  
30  
31 ~~other developed countries, we should be cautious when comparing the absolute values of medical~~  
32 ~~expenses for participants in the present study.~~  
33  
34  
35  
36  
37  
38  
39  
40  
41

42  
43 In conclusion, this investigation into the sex- and age-specific effects of CVD risk factors  
44  
45 on medical expenditure in Japan showed a large relative increase in people with three or four CVD  
46  
47 risk factors. However, the population impacts on total medical expenditure were larger among  
48  
49 people with one or two CVD risk factors, especially in non-elderly women. A high-risk approach for  
50  
51 people with three or four CVD risk factors and a population approach for the majority are thus both  
52  
53  
54



1  
2  
3  
4  
5  
6  
7  
8  
9 necessary to reduce total medical expenditure in Japan.

#### 10 11 12 13 14 **Contributors**

15  
16 YM was involved in database management, data analysis, data interpretation and wrote the  
17 manuscript. TO designed the study and was involved in database management, data interpretation  
18 and wrote the manuscript. KN was involved in data interpretation and writing the manuscript. KM  
19 was involved in data interpretation and writing the manuscript. UH was involved in data  
20 interpretation and writing the manuscript.  
21  
22  
23  
24  
25  
26  
27  
28

#### 29 **Funding**

30  
31 This research was supported by a Grant-in-Aid for Scientific Research (C) from the Japan Society  
32 for the Promotion of Science (22590585) and Grants-in-Aid from the Ministry of Health, Labor and  
33 Welfare, Health and Labor Sciences Research Grants, Japan (Research on Health Services:  
34 H17-Kenkou-007; Comprehensive Research on Cardiovascular and Life-Style Related Diseases:  
35 H18-Junkankitou [Seishuu]-Ippan-012; Comprehensive Research on Cardiovascular and Life-Style  
36 Related Diseases: H20-Junkankitou [Seishuu]-Ippan-013; Comprehensive Research on Life-Style  
37 Related Diseases including Cardiovascular Diseases and Diabetes Mellitus: H20-Junkankitou  
38 [Seishuu]-Ippan-013 and Comprehensive Research on Life-Style Related Diseases including  
39 Cardiovascular Diseases and Diabetes Mellitus: H23-Junkankitou [Seishuu]-Ippan-005).  
40  
41  
42  
43  
44  
45  
46  
47  
48  
49  
50  
51  
52  
53  
54

**Competing interests**

None

**Ethics approval**

Medical research ethics committee approval was granted by the Shiga University of Health Science Research Ethics Committee (17-20-1).

**Provenance and peer review**

Not commissioned; externally peer reviewed.

**Data sharing statement**

No additional data are available.

**References**

1. Ezzati M, Hoon SV, Rodgers A, Lopez AD, Mathers CD, Murray CJ; Comparative Risk Assessment Collaborating Group. Estimates of global and regional potential health gains from reducing multiple major risk factors. *Lancet* 2003;362:271–80.
2. Greenland P, Knoll MD, Stamler J, Neaton JD, Dyer AR, Garside DB, Wilson PW. Major risk factors as antecedents of fatal and nonfatal coronary heart disease events. *JAMA* 2003;290:891–7.
3. Kadota A, Hozawa A, Okamura T, Kadowak T, Nakmaura K, Murakami Y, Hayakawa T, Kita Y,

- 1  
2  
3  
4  
5  
6  
7  
8  
9 Okayama A, Nakamura Y, Kashiwagi A, Ueshima H; NIPPON DATA Research Group.  
10  
11 Relationship between metabolic risk factor clustering and cardiovascular mortality stratified by  
12  
13 high blood glucose and obesity: NIPPON DATA90, 1990–2000. *Diabetes Care* 2007;30:1533–8.  
14  
15  
16 4. McNeill AM, Rosamond WD, Girman CJ, Golden SH, Schmidt MI, East HE, Ballantyne CM,  
17  
18 Heiss G. The metabolic syndrome and 11-year risk of incident cardiovascular disease in the  
19  
20 atherosclerosis risk in communities study. *Diabetes Care* 2005;28:385–90.  
21  
22  
23  
24 5. Nakamura K, Okamura T, Kanda H, Hayakawa T, Okayama A, Ueshima H; Health Promotion  
25  
26 Research Committee of the Shiga National Health Insurance Organizations. Medical costs of  
27  
28 patients with hypertension and/or diabetes: A 10-year follow-up study of National Health  
29  
30 Insurance in Shiga, Japan. *J Hypertens* 2006;24:2305–9.  
31  
32  
33  
34 6. Izumi Y, Tsuji I, Ohkubo T, Kuwahara A, Nishino Y, Hisamichi S Impact of smoking habit on  
35  
36 medical care use and its costs: a prospective observation of National Health Insurance  
37  
38 beneficiaries in Japan. *Int J Epidemiol.* 2001;30:616–21  
39  
40  
41  
42 7. Daviglus ML, Liu K, Yan LL, et al. Relation of body mass index in young adulthood and middle  
43  
44 age to Medicare expenditures in older age. *JAMA.* 2004;292:2743–9.  
45  
46  
47 8. Schauffler HH, D'Agostino RB, Kannel WB. Risk for cardiovascular disease in the elderly and  
48  
49 associated Medicare costs: The Framingham Study. *Am J Prev Med* 1993;9:146–54.  
50  
51  
52  
53 9. Daviglus ML, Liu K, Greenland P, Dyer AR, Garside DB, Manheim L, et al. Benefit of a  
54  
55

- 1  
2  
3  
4  
5  
6  
7  
8  
9 favorable cardiovascular risk-factor profile in middle age with respect to Medicare costs. *N Engl*  
10  
11 *J Med* 1998;339:1122–9.  
12  
13  
14 10. Okamura T, Nakamura K, Kanda H, et al. Effect of combined cardiovascular risk factors on  
15  
16 individual and population medical expenditures – A 10-year cohort study of national health  
17  
18 insurance in a Japanese population. *Circ J* 2007;71:807–13  
19  
20  
21 11. Ohmori-Matsuda K, Kuriyama S, Hozawa A, Nakaya N, Shimazu T, Tsuji I. The joint impact of  
22  
23 cardiovascular risk factors upon medical costs. *Prev Med*. 2007;44:349–55.  
24  
25  
26 12. Fitzmaurice GM, Laird NM, Ware JH. Applied Longitudinal Analysis Second Edition. New  
27  
28 Jersey: John Wiley & Sons, 2011.  
29  
30  
31 13. Ramsey S, Willke R, Briggs A et al. Good research practices for cost-effectiveness analysis  
32  
33 alongside clinical trials: the ISPOR RCT-CEA Task Force report. *Value Health*. 2005;8:521–33.  
34  
35  
36 14. Basu A, Manning WG. Issues for the next generation of health care cost analyses. *Med Care*.  
37  
38 2009;7 (Suppl 1):S109–14.  
39  
40  
41 15. Manning WG, Basu A, Mullahy J. Generalized modeling approaches to risk adjustment of  
42  
43 skewed outcomes data. *J Health Econ*. 2005;24:465–88.  
44  
45  
46 16. Glick HA, Doshi JA, Sonnad SS, Polsky D. Economic Evaluation in Clinical Trials. New York:  
47  
48 Oxford University Press, 2007.  
49  
50  
51 17 · Rose G. Sick individuals and sick populations. *Int J Epidemiol* 1985;14:32–8.  
52  
53  
54

1  
2  
3  
4  
5  
6  
7  
8  
9  
10  
11  
12  
13  
14  
15  
16  
17  
18  
19  
20  
21  
22  
23  
24  
25  
26  
27  
28  
29  
30  
31  
32  
33  
34  
35  
36  
37  
38  
39  
40  
41  
42  
43  
44  
45  
46  
47  
48  
49  
50  
51  
52  
53  
54  
55  
56  
57  
58  
59  
60

For peer review only

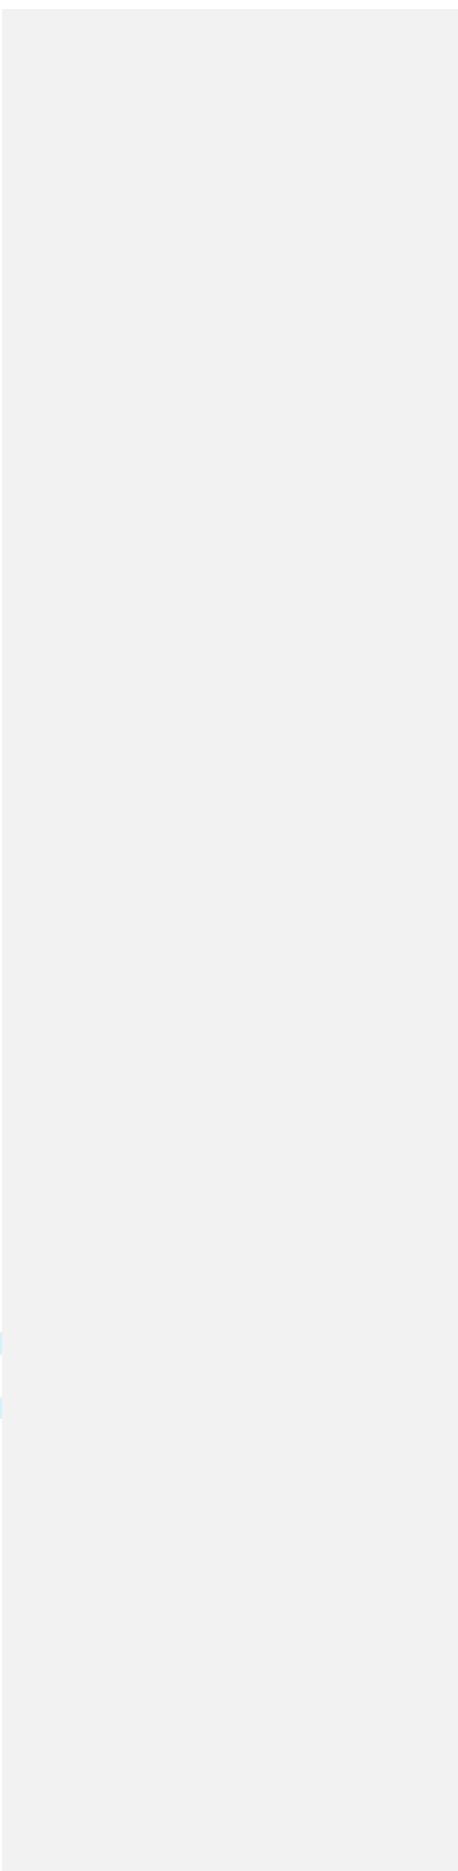

Table 1. The baseline characteristics of study participants, Shiga prefectural follow-up study of medical expenditure, 2000–2006

|                        | Number of cardiovascular risk factors* |                        |                      |                    |      |    |     |      |    |        |      |     |
|------------------------|----------------------------------------|------------------------|----------------------|--------------------|------|----|-----|------|----|--------|------|-----|
|                        | 0                                      |                        |                      | 1                  |      |    | 2   |      |    | 3 or 4 |      |     |
|                        | Men:4890; women:11,737                 | Men:6892; women:10,520 | Men:2337; women:2362 | Men:262; women:114 | Mean | SD | %** | Mean | SD | %**    | Mean | SD  |
| <b>Men</b>             |                                        |                        |                      |                    |      |    |     |      |    |        |      |     |
| Age                    | 70                                     | 11                     | -                    | 68                 | 11   | -  | 67  | 10   | -  | 65     | 10   | -   |
| Systolic blood pressur | 123                                    | 11                     | 0                    | 138                | 19   | 54 | 148 | 17   | 87 | 151    | 14   | 96  |
| Total cholestero       | 187                                    | 28                     | 0                    | 191                | 31   | 5  | 201 | 41   | 23 | 231    | 41   | 65  |
| Blood glucose          | 104                                    | 24                     | 0                    | 107                | 30   | 1  | 118 | 51   | 8  | 187    | 95   | 49  |
| Current smokers        | -                                      | -                      | 0                    | -                  | -    | 39 | -   | -    | 82 | -      | -    | 94  |
| <b>Women</b>           |                                        |                        |                      |                    |      |    |     |      |    |        |      |     |
| Age                    | 66                                     | 11                     | -                    | 69                 | 10   | -  | 68  | 10   | -  | 66     | 10   | -   |
| Systolic blood pressur | 122                                    | 12                     | 0                    | 143                | 18   | 70 | 150 | 16   | 92 | 155    | 15   | 100 |
| Total cholestero       | 199                                    | 25                     | 0                    | 214                | 34   | 23 | 248 | 33   | 80 | 260    | 28   | 91  |
| Blood glucose          | 98                                     | 19                     | 0                    | 102                | 27   | 1  | 114 | 50   | 8  | 174    | 93   | 44  |
| Current smokers        | -                                      | -                      | 0                    | -                  | -    | 7  | -   | -    | 20 | -      | -    | 68  |

\* The four CVD risk factors analysed in this study were defined as follows: hypertension (systolic blood pressure $\geq$ 140 mmHg or diastolic blood pressure $\geq$ 90 mmHg), hypercholesterolemia (total cholesterol $\geq$ 240 mg/dl), high blood glucose (casual blood glucose $\geq$ 200 mg/dl), and smoking (current smoker).

\*\* For each CVD risk factor, the proportions (%) of participants who possess this risk factor are shown in each category.

### Figure legends

Figure 1. The age- and sex-specific estimated annual mean medical expenditure (per year) by CVD risk factor group.

The Gamma regression was used to estimate the mean medical expenditure in the model. The black rectangles show the annual mean medical expenditure (per year) of each CVD risk factor group and the corresponding solid lines show their 95% confidence intervals.

Figure 2. The distribution of the number of CVD risk factors, their estimated mean annual-medical expenditure, (per year), and overspend in the population: (A) men aged 40 to 64, (B) men aged 65 and over, (C) women aged 40 to 64, and (D) women aged 65 and over.

The Gamma regression was used to estimate the mean medical expenditure in the model. The overspend is the difference between the expenditure of each category and the reference (i.e. the no CVD risk factor group). This was defined as the proportion of excess expenditure relative to total medical expenditure.



**The clustering of cardiovascular disease risk factors and their impacts on annual medical expenditure in Japan: community-based cost analysis using Gamma regression models**

|                                 |                                                                                                                                                                                                                                                                                                                                                                                                |
|---------------------------------|------------------------------------------------------------------------------------------------------------------------------------------------------------------------------------------------------------------------------------------------------------------------------------------------------------------------------------------------------------------------------------------------|
| Journal:                        | <i>BMJ Open</i>                                                                                                                                                                                                                                                                                                                                                                                |
| Manuscript ID:                  | bmjopen-2012-002234.R2                                                                                                                                                                                                                                                                                                                                                                         |
| Article Type:                   | Research                                                                                                                                                                                                                                                                                                                                                                                       |
| Date Submitted by the Author:   | 01-Feb-2013                                                                                                                                                                                                                                                                                                                                                                                    |
| Complete List of Authors:       | Murakami, Yoshitaka ; Shiga University of Medical Science, Medical Statistics<br>Okamura, Tomonori; Keio University, Preventive Medicine and Public Health<br>Nakamura, Koshi; Kanazawa Medical University, Epidemiology and Public Health<br>Miura, katsuyuki; Shiga University of Medical Science, Health Science<br>Ueshima, Hirotsugu; Shiga University of Medical Science, Health Science |
| <b>Primary Subject Heading</b>: | Health economics                                                                                                                                                                                                                                                                                                                                                                               |
| Secondary Subject Heading:      | Epidemiology, Cardiovascular medicine, Public health                                                                                                                                                                                                                                                                                                                                           |
| Keywords:                       | Cost analysis, Cardiovascular disease risk factor, Medical expenditure, Japan, Elderly population                                                                                                                                                                                                                                                                                              |
|                                 |                                                                                                                                                                                                                                                                                                                                                                                                |

SCHOLARONE™  
Manuscripts

only



1  
2  
3  
4  
5  
6 **The clustering of cardiovascular disease risk factors and their impacts on annual medical**  
7  
8  
9 **expenditure in Japan: community-based cost analysis using Gamma regression models**  
10  
11

12  
13  
14  
15 Yoshitaka Murakami, Tomonori Okamura, Koshi Nakamura, Katsuyuki Miura, Hirotsugu Ueshima  
16

17  
18  
19  
20 Yoshitaka Murakami associate professor Department of Medical Statistics, Shiga University of  
21  
22  
23 Medical Science, Seta Tsukinowa-cho, Otsu, Shiga 520-2192, Japan Tomonori Okamura professor  
24  
25  
26 Department of Preventive Medicine and Public Health, Keio University, Shinano-machi 35,  
27  
28  
29 Shinjuku-ku, Tokyo 160-8582, Japan Koshi Nakamura associate professor Department of  
30  
31  
32 Epidemiology and Public Health, Kanazawa Medical University, 1-1 Daigaku, Uchinada, Ishikawa  
33  
34  
35 920-0293, Japan Katsuyuki Miura professor Department of Health Science, Shiga University of  
36  
37  
38 Medical Science, Otsu, Seta Tsukinowa-cho, Otsu, Shiga 520-2192, Japan Hirotsugu Ueshima  
39  
40  
41 professor Lifestyle-related Disease Prevention Centre, Shiga University of Medical Science, Seta  
42  
43  
44 Tsukinowa-cho, Otsu, Shiga 520-2192, Otsu, Japan Department of Health Science, Shiga University  
45  
46  
47 of Medical Science, Otsu, Japan  
48  
49  
50  
51

52 Correspondence to: Y Murakami [ymura@belle.shiga-med.ac.jp](mailto:ymura@belle.shiga-med.ac.jp)  
53  
54  
55  
56  
57  
58  
59  
60

**Abstract**

**Objective** The clustering of cardiovascular disease (CVD) risk factors is a serious threat for increasing medical expenses. The age-specific proportion and distribution of medical expenditure attributable to CVD risk factors, especially focused on the elderly, is thus indispensable for formulating public health policy given the extent of the ageing population in developed countries.

**Design** Cost analysis using individuals' medical expenses and their corresponding health examination measures.

**Setting** Shiga prefecture, Japan, from April 2000 to March 2006.

**Participants** 33,213 participants aged 40 years and over

**Main outcome measures** Mean medical expenditure per year.

**Methods** Gamma regression models were applied to examine how the number of CVD risk factors affects mean medical expenditure. The four CVD risk factors analysed in this study were defined as follows: hypertension (systolic blood pressure  $\geq 140$  mmHg or diastolic blood pressure  $\geq 90$  mmHg), hypercholesterolemia (serum total cholesterol  $\geq 240$  mg/dl), high blood glucose (casual blood glucose  $\geq 200$  mg/dl), and smoking (current smoker). Sex- and age-specific investigations were carried out on the elderly (aged 65 and over) and non-elderly (aged 40 to 64) populations.

**Results** The mean medical expenditure (per year) for the no CVD risk factor group was only 110,000 Yen at age 50 (men: 110,708 Yen, women: 107,109 Yen), but this expenditure was six to

1  
2  
3  
4  
5  
6 seven times higher for 80-year-olds who have three or four CVD risk factors (men:603,351 Yen,  
7  
8  
9 women: 765,673 Yen). The total overspend (excess fraction) was larger for the non-elderly (men:  
10  
11  
12 15.4%, women: 11.1%) than for the elderly (men: 0.1%, women: 5.2%) and largely driven by people  
13  
14  
15 with one or two CVD risk factors, except for elderly men.

16  
17  
18 **Conclusion** The age-specific proportion and distribution of medical expenditure attributable to CVD  
19  
20  
21 risk factors showed that a high-risk approach for the elderly and a population approach for the  
22  
23  
24 majority are both necessary to reduce total medical expenditure in Japan.

25  
26 **Keywords:** Cost analysis, Cardiovascular disease risk factor, Medical expenditure, Japan, Elderly  
27  
28  
29 population  
30  
31  
32  
33  
34

### 35 **Article Focus**

36  
37  
38 >Cardiovascular disease risk factors are often clustered in an individual, which seriously increases  
39  
40  
41 the likelihood of suffering from cardiovascular disease and this clustering of risk factors also  
42  
43  
44 increases medical expenses.

45  
46  
47 > The present study examined how age- and sex-specific trends influence total medical expenditure  
48  
49  
50 and assessed how the clustering of CVD risk factors affects the Japanese population.

### 51 **Key Messages**

52  
53  
54  
55 >The total overspend of annual medical expenditure is larger for the non-elderly than for the elderly  
56  
57  
58  
59  
60

1  
2  
3  
4  
5  
6 in Japan.

7  
8  
9 >Larger medical overspends were driven by the groups with one or two risk factors as opposed to  
10  
11  
12 those with three or four risk factors, except for elderly men.

### 13 14 15 **Strengths and Limitations of This Study**

16  
17  
18 >The statistical modelling technique which we applied was suitable for analysing skewed medical  
19  
20  
21 expenditure data in contrast to a previous paper.

22  
23  
24 >Our focus on the elderly, which is considered to be a vulnerable and sometimes frail group, is  
25  
26  
27 especially important in developed countries where the proportion of the elderly is increasing.

28  
29 >The medical expenditure was evaluated over a relatively short time period (six years) despite  
30  
31  
32 investigating long-term effects, such as stroke and myocardial infarction.

### 33 34 35 36 37 38 **Introduction**

39  
40  
41 Hypertension, dyslipidemia, diabetes, and smoking are well-established risk factors for  
42  
43  
44 cardiovascular disease (CVD), and the damage caused by these factors is widespread across the  
45  
46  
47 developed world.<sup>1</sup> However, it is also well recognized in the literature that a combination of these  
48  
49  
50 risk factors in an individual increases the risk of CVD.<sup>2</sup> For example, several studies have shown  
51  
52  
53 that the clustering of metabolic risk factors more than doubles the likelihood of CVD mortality.<sup>3,4</sup>  
54  
55  
56 Moreover, from a health economics perspective, these individual CVD risk factors<sup>5-7</sup> and their  
57  
58  
59  
60

1  
2  
3  
4  
5  
6 combination<sup>8-11</sup> have also been reported to increase total medical expenditure in developed countries.  
7

8  
9 Indeed, the public health sectors in many western nations are now facing considerable challenges  
10  
11 because of such spiralling medical expenses.  
12

13  
14 From a financial viewpoint, the elderly population (persons aged 65 and over) is the  
15  
16 greatest consumer of medical resources. However, even though it is clear that individual medical  
17  
18 bills differ by age group, few studies have investigated age-specific medical expenses because of  
19  
20 methodological issues, such as insufficient sample sizes and inappropriate statistical models. To help  
21  
22 bridge this gap in the body of knowledge on this topic, a comprehensive community-based database  
23  
24 for medical expenditure, which includes approximately 60,000 individuals, has been developed in  
25  
26 Shiga, Japan. This database consists of individuals' health examinations and their medical expenses  
27  
28 over a three- to five-year period. Exploring this database allows us to perform an age-specific cost  
29  
30 analysis using Gamma regression models, especially for the elderly population. The present study  
31  
32 examined the age- and sex-specific proportion and distribution of medical expenditure attributable  
33  
34 for the number of CVD risk factors in the Japanese population.  
35  
36  
37  
38  
39  
40  
41  
42  
43  
44  
45  
46  
47  
48

## 49 **Methods**

### 50 **The medical expenditure system in Japan**

51  
52  
53  
54  
55 The payment of medical expenses in Japan is based on a public medical insurance  
56  
57  
58  
59  
60

1  
2  
3  
4  
5  
6 institution that comprises two systems. Since 1961, all Japan residents have been required to enroll  
7  
8  
9 in one of these two insurance systems under the so-called 'health insurance for all' scheme. First, the  
10  
11 National Health Insurance (NHI) scheme covers self-employed workers (e.g. farmers, fishers,  
12  
13 shopkeepers), retirees, and their dependents. The elderly in Japan are thus most often covered by the  
14  
15 NHI scheme. The other insurance system (e.g. Health Insurance Society, Mutual Aid Association)  
16  
17 covers company employees and their dependents. These two systems cover 65.3% and 34.7% of the  
18  
19 Japanese population, respectively. All charges are strictly controlled by a service-specific fee  
20  
21 schedule set by the national government that is constant regardless of insurance system or health  
22  
23 institution.  
24  
25  
26  
27  
28  
29  
30  
31

### 32 **Study population and data**

33  
34  
35 The comprehensive dataset used in this study comprised 64,450 NHI beneficiaries in Shiga  
36  
37 prefecture in central Japan. Data on medical expenses and annual health examinations are both key  
38  
39 components of this database. Medical expenses data were collected from the database of the Shiga  
40  
41 Health Insurance Organization, which is a local branch of the NHI. The original database provides  
42  
43 data from April 2000 to March 2006. For the economic evaluation, we used a mean medical  
44  
45 expenditure (per year), which was calculated by summing all medical expenditure throughout the  
46  
47 observation periods and divided by the total observation periods of months. This monthly-based  
48  
49 measure is multiplied twelve to transform a mean medical expenditure (per year). The data of an  
50  
51  
52  
53  
54  
55  
56  
57  
58  
59  
60

1  
2  
3  
4  
5  
6 annual health examination were provided from every local municipality of Shiga prefecture. In Japan,  
7  
8  
9 an annual health examination was free of charge or inexpensive for all Japanese, which is entitled by  
10  
11  
12 the law (Act on Assurance of Medical Care for Elderly People). Those data were appropriately  
13  
14  
15 stored with security protections in every local municipality. Data on annual health examinations  
16  
17  
18 from April 2000, which included the baseline information for our study, were provided from all 26  
19  
20  
21 local municipalities in Shiga prefecture. Both medical expenses and health examination measures  
22  
23  
24 were merged into the database using individual identification information (i.e. name, sex, and date of  
25  
26  
27 birth) for the administrative use. This merging process was conducted by the Shiga Health Insurance  
28  
29  
30 Organization, the public agency for paying insurance in Shiga. The anonymous dataset were  
31  
32  
33 extracted from the database and then, participants who displayed signs of blood pressure, serum total  
34  
35  
36 cholesterol, casual blood glucose, and smoking habits (see next subsection) were included in the  
37  
38  
39 analysis. The participants who have not censored during whole follow-up period were included in  
40  
41  
42 the analysis (n=33,213). Medical research ethics committee approval was granted by the Shiga  
43  
44  
45 University of Health Science Research Ethics Committee (17-20-1).

#### 46 47 **Statistical analysis**

48  
49 Specifically, the four CVD risk factors analysed in this study were defined as follows: hypertension  
50  
51  
52 (systolic blood pressure $\geq$ 140 mmHg or diastolic blood pressure $\geq$ 90 mmHg), hypercholesterolemia  
53  
54  
55 (serum total cholesterol $\geq$ 240 mg/dl), high blood glucose (casual blood glucose $\geq$ 200 mg/dl), and  
56  
57  
58

1  
2  
3  
4  
5  
6 smoking (current smoker). All participants were classified into four categories (i.e. none, one, two,  
7  
8  
9 and three or four) based on these four CVD risk factors. The unit of medical expenditure was set as  
10  
11  
12 Japanese Yen (i.e. 100 Japanese yen (JPY) = 0.81 pounds (GBP), at the exchange rates published on  
13  
14  
15 10 August 2012).

16  
17  
18 A gamma regression model, which is a member of generalized linear models<sup>12</sup>, was used to  
19  
20  
21 estimate the mean medical expenditure of the abovementioned four categories after adjusting for  
22  
23  
24 confounding factors. As medical expenditure data usually involve a certain proportion of zeros and  
25  
26  
27 some extreme values, their distribution was skewed to the right<sup>13-15</sup>. A gamma regression is the best  
28  
29  
30 modelling approach to deal with this skewness.

31  
32  
33 Statistical models were formulated by sex and age. Specifically, we estimated age-specific  
34  
35  
36 medical expenditure (per year) for the following four ages: 50 years, 60 years, 70 years, and 80 years.  
37  
38  
39 These estimated expenses were then plotted against the number of CVD risk factors. The regional  
40  
41  
42 variation of local municipalities in Shiga prefecture was considered using the generalized estimating  
43  
44  
45 equation (GEE) approach<sup>12</sup>, which accounts for any correlation within each municipality.

46  
47  
48 To describe how the increasing number of CVD risk factors affects total medical  
49  
50  
51 expenditure in Japan, age-adjusted mean medical expenditure and the corresponding number of  
52  
53  
54 participants were also graphed, both for the elderly (aged 65 and over) and for the non-elderly (aged  
55  
56  
57 40 to 64) populations. The cost ratios and overspend (excess fraction) were also calculated for each  
58  
59  
60



1  
2  
3  
4  
5  
6 CVD risk factor group. The cost ratio represents the estimated mean medical expenditure of the  
7  
8  
9 corresponding group divided by the reference (i.e. the no CVD risk factor group), while overspend  
10  
11  
12 was calculated as the proportion of a certain group's excess medical expenditure relative to the  
13  
14  
15 whole population. This overspend can be interpreted as the medical expenditure that would not have  
16  
17  
18 occurred if the participants had possessed no CVD risk factors. All statistical analysis was performed  
19  
20  
21 using SAS release 9.20 (SAS Institute Inc., Cary, NC, USA).  
22  
23  
24  
25

## 26 **Results**

27  
28  
29 Table 1 compares the baseline characteristics of the four CVD risk factor groups. As the  
30  
31  
32 number of CVD risk factors increases, the means of systolic blood pressure, total cholesterol, and  
33  
34  
35 blood glucose and the proportion of current smokers grow in both men and women. The most  
36  
37  
38 prevalent CVD risk factors in the study participants are, first, hypertension in both men and women  
39  
40  
41 followed by smoking in men and cholesterol in women.  
42  
43

44 Figure 1 shows the age-specific estimated mean medical expenditure (per year) for each  
45  
46  
47 CVD risk factor group by sex and age. Most age group graphs indicate a gradual increase in medical  
48  
49  
50 expenditure as the number of CVD risk factors rises for both men and women. This figure shows  
51  
52  
53 that the mean medical expenditure (per year) for the no CVD risk factor group is just 110,000 Yen at  
54  
55  
56 age 50 (men: 110,708 Yen, women: 107,109 Yen), but that this expenditure is six to seven times  
57  
58  
59  
60

1  
2  
3  
4  
5  
6 higher for 80-year-olds who have three or four CVD risk factors (men: 603,351 Yen, women:  
7  
8  
9 765,673 Yen).

10  
11  
12 Figure 2 shows the distribution of the number of CVD risk factors and their corresponding  
13  
14 mean medical expenditure (per year) for the four subgroups (i.e. non-elderly men, elderly men,  
15  
16 non-elderly women, elderly women) adjusted by age. The corresponding cost ratios and overspends  
17  
18 (excess fractions) in each group are also shown by sex and age. The adjusted mean medical  
19  
20 expenditure increases as the number of CVD risk factors rises, meaning that the cost ratio for the  
21  
22 group with three or four CVD risk factors increases by more than 40% relative to the reference  
23  
24 group. These trends were most obvious in non-elderly men (cost ratio: 1.86). The total overspend  
25  
26 was larger in the non-elderly population (men: 15.4%, women: 11.1%) than it was in the elderly  
27  
28 (men: 0.1%, women: 5.2%). The total overspend was mostly driven by the groups with one  
29  
30 (non-elderly men: 6.8%, non-elderly women: 7.4%, elderly women: 3.7%) or two risk factors  
31  
32 (non-elderly men: 6.8%, non-elderly women: 3.5%, elderly women: 1.3%) compared with three or  
33  
34 four risk factors (non-elderly men: 1.8%, non-elderly women: 0.2%, elderly women: 0.2%), with the  
35  
36 exception of elderly men.  
37  
38  
39  
40  
41  
42  
43  
44  
45  
46  
47  
48  
49  
50  
51  
52

### 53 Discussion

54  
55 We performed a community-based cost analysis to investigate the sex- and age-specific  
56  
57  
58  
59  
60

1  
2  
3  
4  
5  
6 effects of CVD risk factor clustering on total medical expenditure in Japan. We measured the relative  
7  
8  
9 increases (cost ratios) and population impacts (overspends) and found that annual medical  
10  
11  
12 expenditure increases as the number of CVD risk factors rises in all age and sex groups. While the  
13  
14  
15 relative increase in the group with three or four CVD risk factors was greatest, the population  
16  
17  
18 impacts on total medical expenditure were larger among the group with one or two CVD risk factors.  
19

20  
21 The findings from the Framingham study have already shown that Medicare costs increase  
22  
23 with combinations of risk factors, such as hypertension, smoking, and hypercholesterolemia.<sup>8</sup>  
24  
25  
26 Studies from the United States<sup>9</sup> and Japan<sup>10,11</sup> have also shown similar increasing patterns in the  
27  
28  
29 community setting. Our study showed that the cost ratios in the three or four CVD risk factor group  
30  
31  
32 were between 1.44 and 1.74, which are similar to the values found in the Framingham study<sup>8</sup> and  
33  
34  
35 another study in Japan<sup>10</sup>. However, other studies have found relatively larger ratios, such as 1.84–  
36  
37  
38 2.45 in the United States<sup>9</sup> and 1.91 in Japan<sup>11</sup>, since medical expenditure is largely affected by the  
39  
40  
41 insurance system, study participants, and the region. The different characteristics of these previous  
42  
43  
44 studies, such as the definition of risk factors, length of study periods, and estimation procedures  
45  
46  
47 (statistical models), also affect their results.  
48

49  
50 The strength of our study is that the statistical modelling technique applied was suitable for  
51  
52  
53 analysing skewed medical expenditure data in contrast to a previous paper. The guideline from the  
54  
55  
56 International Society of Pharmacoeconomics and Outcome Research (ISPOR) recommended using  
57  
58  
59

1  
2  
3  
4  
5  
6 this statistical model in the cost data analysis<sup>13</sup>. The cost data often show a skewed distribution,  
7  
8  
9 which violated the equidispersion property of mean and variance. In a case with a certain proportion  
10  
11  
12 of zeros, a Gamma regression is most suitable statistical model, which assumed the extra-variation  
13  
14  
15 (overdispersion) of the outcome. We applied a Gamma regression model<sup>12-15</sup> for the cost  
16  
17  
18 minimization analysis<sup>16</sup> in order to investigate in-depth sex- and age-specific attributes, which is  
19  
20  
21 difficult in a stratified analysis. Our focus on the elderly is especially important in developed  
22  
23  
24 countries, where the ageing population is increasing the proportion of the elderly, which is  
25  
26  
27 considered to be a vulnerable and sometimes frail group.

28  
29 It is important to note that individual medical expenses were highest in the three or four  
30  
31  
32 CVD risk factor group for all subgroups. This population would thus be the main target for high-risk  
33  
34  
35 approaches to contain medical expenditure growth. High-risk strategies, such as comprehensive  
36  
37  
38 health guidance by public health nurses, dieticians, or physicians, can be readily understood and they  
39  
40  
41 can strongly motivate people to change their lifestyles to manage CVD risk factors.

42  
43  
44 However, from the viewpoint of total medical expenditure, people with one or two CVD  
45  
46  
47 risk factors are not negligible. This population had a greater influence on total medical expenditure  
48  
49  
50 than did the high-CVD risk factor group, especially in the non-elderly, which accounted for more  
51  
52  
53 than 10% of total medical expenditure when the one and two CVD risk factor groups were combined  
54  
55  
56 compared with 5.0% for elderly women and 0.0% for elderly men. However, it is difficult to  
57  
58  
59  
60

1  
2  
3  
4  
5  
6 implement effective high-risk strategies because of the large population of people with one or two  
7  
8  
9 CVD risk factors. For this group, a population strategy may be useful for gradually lowering the  
10  
11  
12 distribution of CVD risk factors<sup>17</sup>.  
13

14  
15 The present study has several limitations. First, details of medical diagnoses, medical  
16  
17  
18 treatment status (e.g. prescriptions), clinical condition such as CVD history, and cause of mortality  
19  
20  
21 were unavailable in this study. It is true that the medical treatment status and the clinical conditions  
22  
23  
24 are key elements of increasing medical expenditure. Our reference group contained both the  
25  
26  
27 non-prescribed (healthy population) and the prescribed. This might overestimate the “referent” mean  
28  
29  
30 medical expenditure. From this viewpoint, the relative measures (cost ratios) of CVD risk factors  
31  
32  
33 might be underestimated in this study. Second, medical expenditure was evaluated over a relatively  
34  
35  
36 short time period (six years) despite investigating long-term effects. As severe health events such as  
37  
38  
39 stroke and myocardial infarction can occur after a long interval in high-risk individuals, excess  
40  
41  
42 medical expenditure might be underestimated. Third, data on fasting blood glucose, triglycerides,  
43  
44  
45 and HDL-cholesterol were unavailable. Finally, because the public medical insurance system in  
46  
47  
48 Japan is different from those in other developed countries, we should be cautious when comparing  
49  
50  
51 the absolute values of medical expenses for participants in the present study.  
52

53  
54  
55 In conclusion, this investigation into the sex- and age-specific effects of CVD risk factors  
56  
57  
58 on medical expenditure in Japan showed a large relative increase in people with three or four CVD  
59  
60

1  
2  
3  
4  
5  
6 risk factors. However, the population impacts on total medical expenditure were larger among  
7  
8  
9 people with one or two CVD risk factors, especially in non-elderly women. A high-risk approach for  
10  
11  
12 people with three or four CVD risk factors and a population approach for the majority are thus both  
13  
14  
15 necessary to reduce total medical expenditure in Japan.  
16  
17  
18  
19

### 20 **Contributors**

21  
22  
23 YM was involved in database management, data analysis, data interpretation and wrote the  
24  
25  
26 manuscript. TO designed the study and was involved in database management, data interpretation  
27  
28  
29 and wrote the manuscript. KN was involved in data interpretation and writing the manuscript. KM  
30  
31  
32 was involved in data interpretation and writing the manuscript. UH was involved in data  
33  
34  
35 interpretation and writing the manuscript.  
36  
37

### 38 **Funding**

39  
40 This research was supported by a Grant-in-Aid for Scientific Research (C) from the Japan Society  
41  
42  
43 for the Promotion of Science (22590585) and Grants-in-Aid from the Ministry of Health, Labor and  
44  
45  
46 Welfare, Health and Labor Sciences Research Grants, Japan (Research on Health Services:  
47  
48  
49 H17-Kenkou-007; Comprehensive Research on Cardiovascular and Life-Style Related Diseases:  
50  
51  
52 H18-Junkankitou [Seishuu]-Ippan-012; Comprehensive Research on Cardiovascular and Life-Style  
53  
54  
55 Related Diseases: H20-Junkankitou [Seishuu]-Ippan-013; Comprehensive Research on Life-Style  
56  
57  
58  
59  
60

1  
2  
3  
4  
5  
6 Related Diseases including Cardiovascular Diseases and Diabetes Mellitus: H20-Junkankitou  
7  
8  
9 [Seishuu]-Ippan-013 and Comprehensive Research on Life-Style Related Diseases including  
10  
11  
12 Cardiovascular Diseases and Diabetes Mellitus: H23-Junkankitou [Seishuu]-Ippan-005).  
13

#### 14 **Competing interests**

15  
16  
17 None  
18  
19

#### 20 **Ethics approval**

21  
22  
23 Medical research ethics committee approval was granted by the Shiga University of Health Science  
24  
25  
26 Research Ethics Committee (17-20-1).  
27  
28

#### 29 **Provenance and peer review**

30  
31  
32 Not commissioned; externally peer reviewed.  
33  
34

#### 35 **Data sharing statement**

36  
37  
38 No additional data are available.  
39  
40  
41  
42

#### 43 **References**

- 44  
45  
46 1. Ezzati M, Hoorn SV, Rodgers A, Lopez AD, Mathers CD, Murray CJ; Comparative Risk  
47  
48 Assessment Collaborating Group. Estimates of global and regional potential health gains from  
49  
50 reducing multiple major risk factors. *Lancet* 2003;362:271–80.  
51  
52  
53  
54  
55 2. Greenland P, Knoll MD, Stamler J, Neaton JD, Dyer AR, Garside DB, Wilson PW. Major risk  
56  
57  
58  
59  
60

- 1  
2  
3  
4  
5  
6 factors as antecedents of fatal and nonfatal coronary heart disease events. *JAMA* 2003;290:891–  
7  
8  
9 7.
- 10  
11  
12 3. Kadota A, Hozawa A, Okamura T, Kadowak T, Nakmaura K, Murakami Y, Hayakawa T, Kita Y,  
13  
14 Okayama A, Nakamura Y, Kashiwagi A, Ueshima H; NIPPON DATA Research Group.  
15  
16 Relationship between metabolic risk factor clustering and cardiovascular mortality stratified by  
17  
18 high blood glucose and obesity: NIPPON DATA90, 1990–2000. *Diabetes Care* 2007;30:1533–8.  
19  
20  
21  
22  
23 4. McNeill AM, Rosamond WD, Girman CJ, Golden SH, Schmidt MI, East HE, Ballantyne CM,  
24  
25  
26 Heiss G. The metabolic syndrome and 11-year risk of incident cardiovascular disease in the  
27  
28 atherosclerosis risk in communities study. *Diabetes Care* 2005;28:385–90.  
29  
30  
31  
32 5. Nakamura K, Okamura T, Kanda H, Hayakawa T, Okayama A, Ueshima H; Health Promotion  
33  
34 Research Committee of the Shiga National Health Insurance Organizations. Medical costs of  
35  
36 patients with hypertension and/or diabetes: A 10-year follow-up study of National Health  
37  
38 Insurance in Shiga, Japan. *J Hypertens* 2006;24:2305–9.  
39  
40  
41  
42  
43 6. Izumi Y, Tsuji I, Ohkubo T, Kuwahara A, Nishino Y, Hisamichi S Impact of smoking habit on  
44  
45 medical care use and its costs: a prospective observation of National Health Insurance  
46  
47 beneficiaries in Japan. *Int J Epidemiol.* 2001;30:616–21  
48  
49  
50  
51  
52 7. Daviglus ML, Liu K, Yan LL, et al. Relation of body mass index in young adulthood and middle  
53  
54 age to Medicare expenditures in older age. *JAMA.* 2004;292:2743–9.  
55  
56  
57  
58  
59  
60



- 1  
2  
3  
4  
5  
6 8. Schauffler HH, D'Agostino RB, Kannel WB. Risk for cardiovascular disease in the elderly and  
7  
8 associated Medicare costs: The Framingham Study. *Am J Prev Med* 1993;9:146–54.  
9  
10
- 11 9. Daviglius ML, Liu K, Greenland P, Dyer AR, Garside DB, Manheim L, et al. Benefit of a  
12  
13 favorable cardiovascular risk-factor profile in middle age with respect to Medicare costs. *N Engl*  
14  
15 *J Med* 1998;339:1122–9.  
16  
17
- 18 10. Okamura T, Nakamura K, Kanda H, et al. Effect of combined cardiovascular risk factors on  
19  
20 individual and population medical expenditures – A 10-year cohort study of national health  
21  
22 insurance in a Japanese population. *Circ J* 2007;71:807–13  
23  
24
- 25 11. Ohmori-Matsuda K, Kuriyama S, Hozawa A, Nakaya N, Shimazu T, Tsuji I. The joint impact of  
26  
27 cardiovascular risk factors upon medical costs. *Prev Med*. 2007;44:349–55.  
28  
29
- 30 12. Fitzmaurice GM, Laird NM, Ware JH. Applied Longitudinal Analysis Second Edition. New  
31  
32 Jersey: John Wiley & Sons, 2011.  
33  
34
- 35 13. Ramsey S, Willke R, Briggs A et al. Good research practices for cost-effectiveness analysis  
36  
37 alongside clinical trials: the ISPOR RCT-CEA Task Force report. *Value Health*. 2005;8:521–33.  
38  
39
- 40 14. Basu A, Manning WG. Issues for the next generation of health care cost analyses. *Med Care*.  
41  
42 2009;7 (Suppl 1):S109–14.  
43  
44
- 45 15. Manning WG, Basu A, Mullahy J. Generalized modeling approaches to risk adjustment of  
46  
47 skewed outcomes data. *J Health Econ*. 2005;24:465–88.  
48  
49  
50  
51  
52  
53  
54  
55  
56  
57  
58  
59  
60

1  
2  
3  
4  
5  
6 16. Glick HA, Doshi JA, Sonnad SS, Polsky D. Economic Evaluation in Clinical Trials. New York:  
7

8  
9 Oxford University Press, 2007.  
10

11 17 . Rose G. Sick individuals and sick populations. *Int J Epidemiol* 1985;14:32–8.  
12  
13  
14  
15  
16  
17  
18  
19  
20  
21  
22  
23  
24  
25  
26  
27  
28  
29  
30  
31  
32  
33  
34  
35  
36  
37  
38  
39  
40  
41  
42  
43  
44  
45  
46  
47  
48  
49  
50  
51  
52  
53  
54  
55  
56  
57  
58  
59  
60

For peer review only

Table 1. The baseline characteristics of study participants, Shiga prefectural follow-up study of medical expenditure, 2000–2006

|                         | Number of cardiovascular risk factors* |    |     |                      |    |     |                     |    |     |                   |    |     |
|-------------------------|----------------------------------------|----|-----|----------------------|----|-----|---------------------|----|-----|-------------------|----|-----|
|                         | 0                                      |    |     | 1                    |    |     | 2                   |    |     | 3 or 4            |    |     |
|                         | Men:4187; women:9924                   |    |     | Men:5947, women:8953 |    |     | Men1945, women:1964 |    |     | Men:206, women:87 |    |     |
|                         | Mean                                   | SD | %** | Mean                 | SD | %** | Mean                | SD | %** | Mean              | SD | %** |
| <b>Men</b>              |                                        |    |     |                      |    |     |                     |    |     |                   |    |     |
| Age                     | 70                                     | 10 | -   | 68                   | 11 | -   | 67                  | 10 | -   | 65                | 10 | -   |
| Systolic blood pressure | 124                                    | 11 | 0   | 138                  | 19 | 55  | 148                 | 17 | 87  | 151               | 15 | 96  |
| Total cholesterol       | 188                                    | 27 | 0   | 191                  | 31 | 5   | 202                 | 41 | 23  | 234               | 39 | 68  |
| Blood glucose           | 103                                    | 23 | 0   | 106                  | 29 | 1   | 118                 | 50 | 8   | 178               | 94 | 45  |
| Current smokers         | -                                      | -  | 0   | -                    | -  | 38  | -                   | -  | 82  | -                 | -  | 94  |
| <b>Women</b>            |                                        |    |     |                      |    |     |                     |    |     |                   |    |     |
| Age                     | 66                                     | 11 | -   | 69                   | 10 | -   | 68                  | 9  | -   | 66                | 9  | -   |
| Systolic blood pressure | 122                                    | 12 | 0   | 143                  | 18 | 70  | 150                 | 15 | 93  | 156               | 15 | 100 |
| Total cholesterol       | 200                                    | 24 | 0   | 214                  | 34 | 23  | 249                 | 32 | 82  | 261               | 23 | 94  |
| Blood glucose           | 98                                     | 19 | 0   | 102                  | 27 | 1   | 112                 | 46 | 7   | 168               | 92 | 39  |
| Current smokers         | -                                      | -  | 0   | -                    | -  | 6   | -                   | -  | 18  | -                 | -  | 70  |

\* The four CVD risk factors analysed in this study were defined as follows: hypertension (systolic blood pressure  $\geq 140$  mmHg or diastolic blood pressure  $\geq 90$  mmHg), hypercholesterolemia (total cholesterol  $\geq 240$  mg/dl), high blood glucose (casual blood glucose  $\geq 200$  mg/dl), and smoking (current smoker).

\*\* For each CVD risk factor, the proportions (%) of participants who possess this risk factor are shown in each category.

### Figure legends

Figure 1. The age- and sex-specific estimated mean medical expenditure (per year) by CVD risk factor group.

The Gamma regression was used to estimate the mean medical expenditure in the model. The black rectangles show the mean medical expenditure (per year) of each CVD risk factor group and the corresponding solid lines show their 95% confidence intervals.

Figure 2. The distribution of the number of CVD risk factors, their estimated mean medical expenditure (per year), and overspend in the population: (A) men aged 40 to 64, (B) men aged 65 and over, (C) women aged 40 to 64, and (D) women aged 65 and over.

The Gamma regression was used to estimate the mean medical expenditure in the model. The overspend is the difference between the expenditure of each category and the reference (i.e. the no CVD risk factor group). This was defined as the proportion of excess expenditure relative to total medical expenditure.

# Fig. 1

1  
2  
3  
4  
5  
6  
7  
8  
9  
10  
11  
12  
13  
14  
15  
16  
17  
18  
19  
20  
21  
22  
23  
24  
25  
26  
27  
28  
29  
30  
31  
32  
33  
34  
35  
36  
37  
38  
39  
40  
41  
42  
43

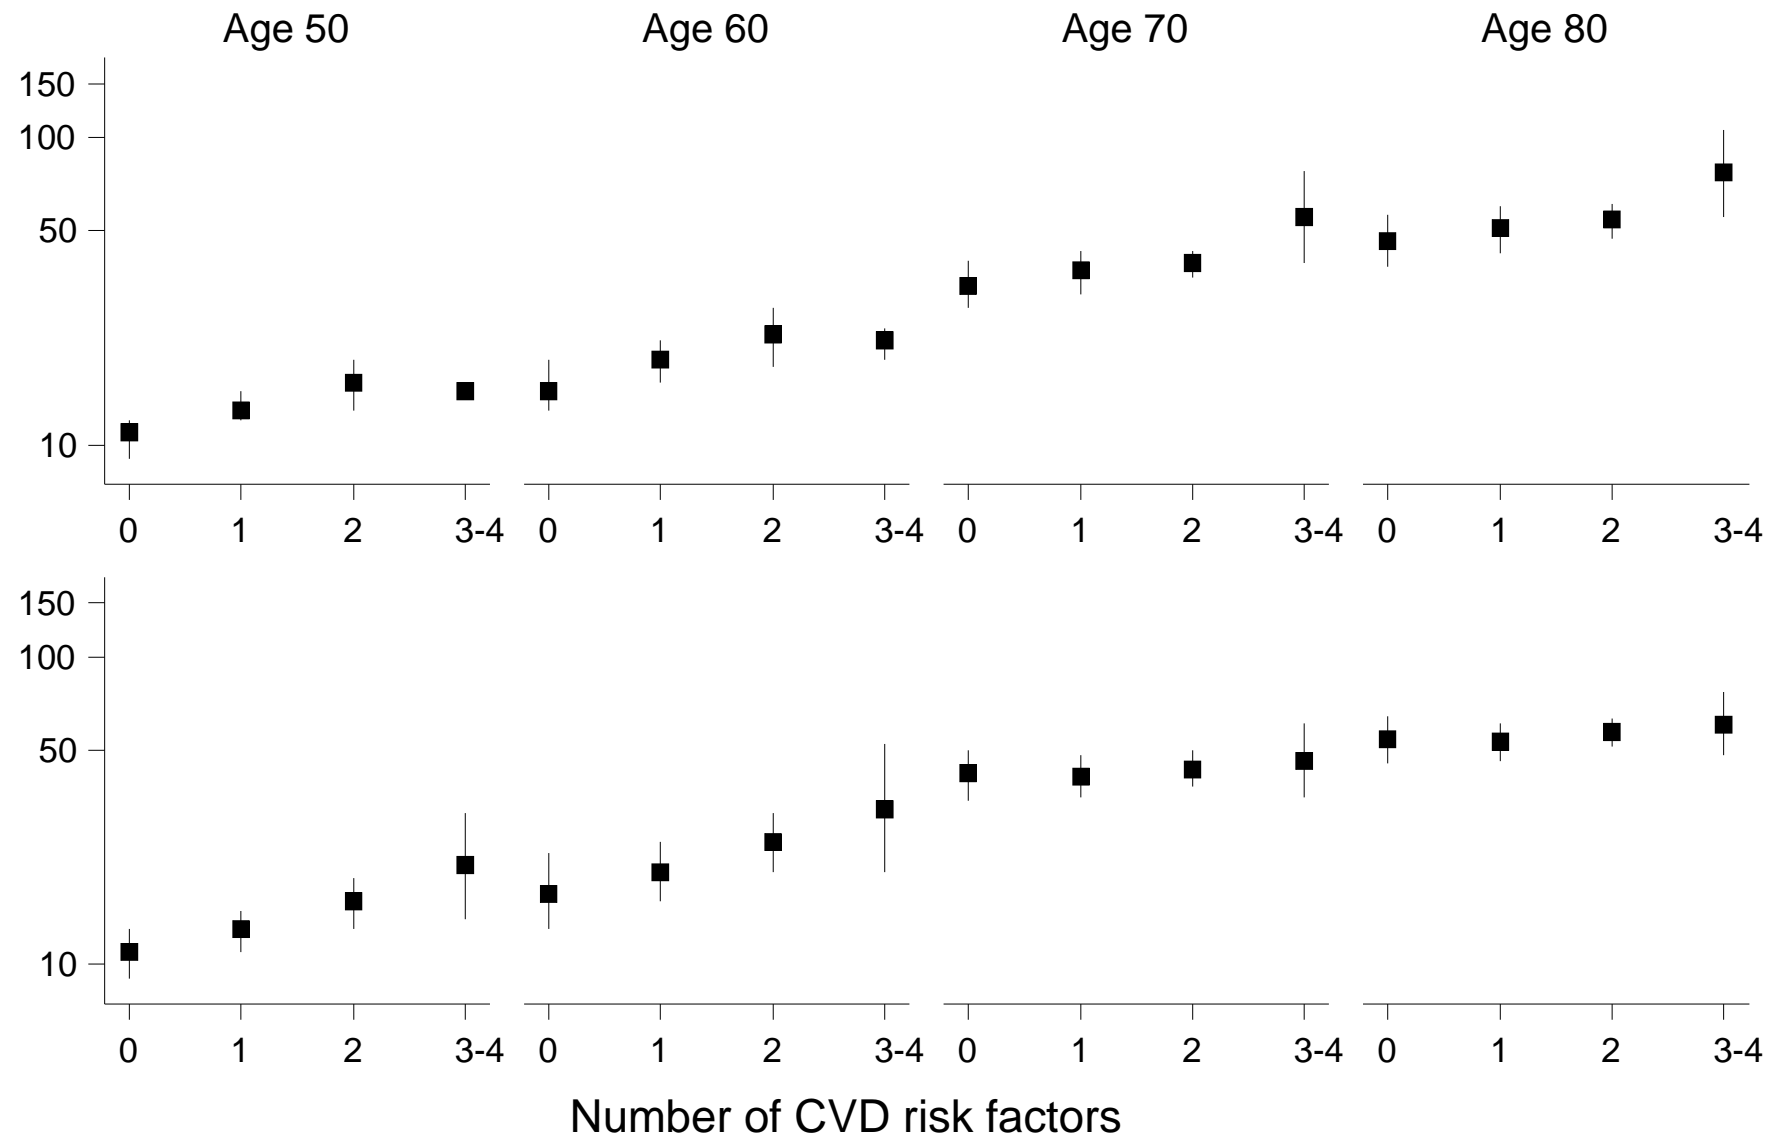

1  
2  
3  
4  
5  
6  
7  
8  
9  
10  
11  
12  
13  
14  
15  
16  
17  
18  
19  
20  
21  
22  
23  
24  
25  
26  
27  
28  
29  
30  
31  
32  
33  
34  
35  
36  
37  
38  
39  
40  
41  
42  
43

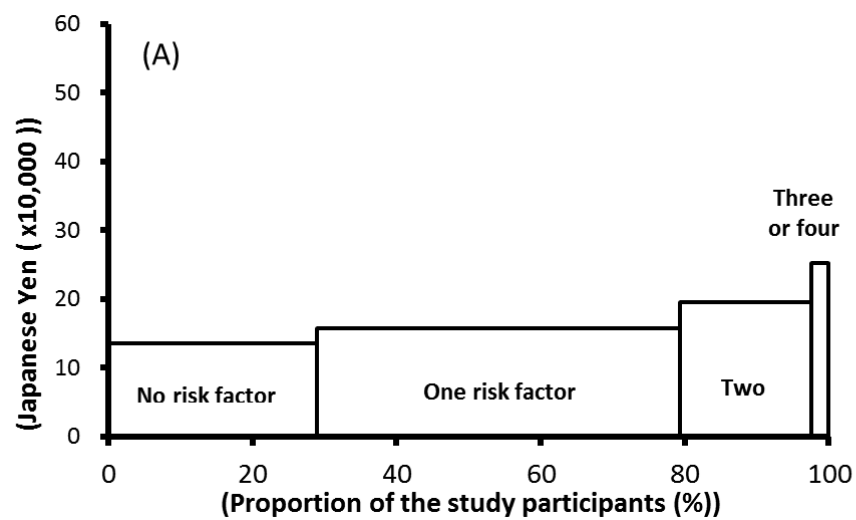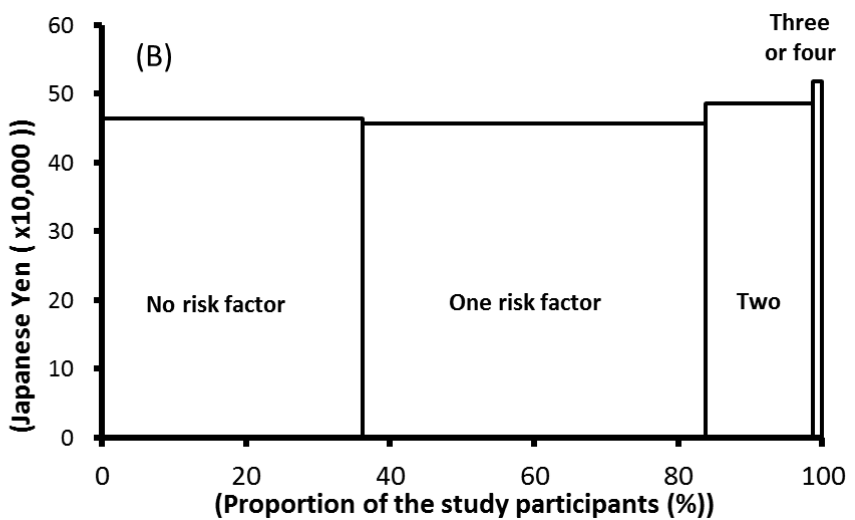

|                     |                 |      |      |      |
|---------------------|-----------------|------|------|------|
| Ratio               | 1.0 (reference) | 1.16 | 1.44 | 1.86 |
| Excess fraction (%) |                 | 6.8  | 6.8  | 1.8  |

|                     |                 |      |      |      |
|---------------------|-----------------|------|------|------|
| Ratio               | 1.0 (reference) | 0.99 | 1.05 | 1.12 |
| Excess fraction (%) |                 | -0.6 | 0.6  | 0.1  |

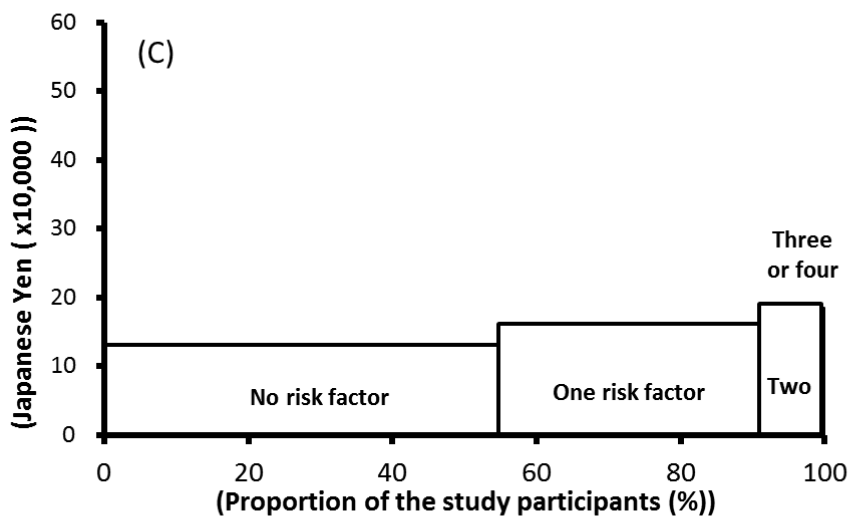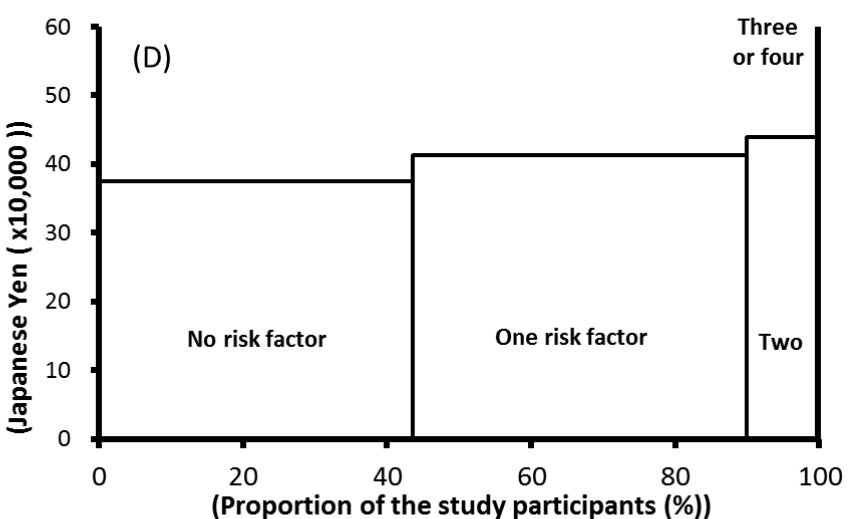

|                     |                 |      |      |      |
|---------------------|-----------------|------|------|------|
| Ratio               | 1.0 (reference) | 1.23 | 1.46 | 1.40 |
| Excess fraction (%) |                 | 7.4  | 3.5  | 0.2  |

|                     |                 |      |      |      |
|---------------------|-----------------|------|------|------|
| Ratio               | 1.0 (reference) | 1.10 | 1.17 | 1.66 |
| Excess fraction (%) |                 | 3.7  | 1.3  | 0.2  |

1  
2  
3  
4  
5  
6  
7  
8  
9  
10  
11 **The clustering of cardiovascular disease risk factors and their impacts on annual medical**  
12 **expenditure in Japan: community-based cost ~~minimization~~ analysis using Gamma regression**  
13 **models**  
14  
15  
16  
17  
18  
19  
20  
21

22 Yoshitaka Murakami, Tomonori Okamura, Koshi Nakamura, Katsuyuki Miura, Hirotsugu Ueshima  
23  
24  
25  
26

27 Yoshitaka Murakami associate professor Department of Medical Statistics, Shiga University of  
28 Medical Science, Seta Tsukinowa-cho, Otsu, Shiga 520-2192, Japan Tomonori Okamura professor  
29 Department of Preventive Medicine and Public Health, Keio University, Shinano-machi 35,  
30 Shinjuku-ku, Tokyo 160-8582, Japan Koshi Nakamura associate professor Department of  
31 Epidemiology and Public Health, Kanazawa Medical University, 1-1 Daigaku, Uchinada, Ishikawa  
32 920-0293, Japan Katsuyuki Miura professor Department of Health Science, Shiga University of  
33 Medical Science, Otsu, Seta Tsukinowa-cho, Otsu, Shiga 520-2192, Japan Hirotsugu Ueshima  
34 professor Lifestyle-related Disease Prevention Centre, Shiga University of Medical Science, Seta  
35 Tsukinowa-cho, Otsu, Shiga 520-2192, Otsu, Japan Department of Health Science, Shiga University  
36 of Medical Science, Otsu, Japan  
37  
38  
39  
40  
41  
42  
43  
44  
45  
46  
47  
48  
49  
50  
51  
52  
53  
54  
55  
56  
57  
58  
59  
60

Formatted: Font: Bold

Correspondence to: Y Murakami ymura@belle.shiga-med.ac.jp

## Abstract

**Objective** The clustering of cardiovascular disease (CVD) risk factors is a serious threat to a population health. This detrimental effect also for increases medical expenses, especially for the elderly population. The present age-specific investigation into quantitative assessment of the proportion and distribution of medical expenditure attributable to CVD risk factors, especially focused on the elderly, is thus indispensable for formulating public health policy given the extent of the ageing population in developed countries.

**Design** Cost minimization analysis using individuals' medical expenses and their corresponding health examination measures.

**Setting** Shiga prefecture, Japan, from April 2000 to March 2006.

**Participants** 339,213+4 participants aged 40 years and over.

**Main outcome measures** Mean annual medical expenditure per year.

**Methods** Gamma regression models were applied to examine how the number of CVD risk factors affects annual mean medical expenditure. The four CVD risk factors analysed in this study were defined as follows: hypertension (systolic blood pressure  $\geq 140$  mmHg or diastolic blood pressure  $\geq 90$  mmHg), hypercholesterolemia (serum total cholesterol  $\geq 240$  mg/dl), high blood glucose (casual

Formatted: Font:

Formatted: Underline

Formatted: Underline

Formatted: Underline



1  
2  
3  
4  
5  
6  
7  
8  
9 blood glucose  $\geq$ 200 mg/dl), and smoking (current smoker). Sex- and age-specific investigations were  
10  
11 carried out on the elderly (aged 65 and over) and non-elderly (aged 40 to 64) populations.

12  
13 **Results** The mean ~~annual~~ medical expenditure (per year) for the no CVD risk factor group was only  
14  
15 1130,000 Yen at age 50 (men: ~~11033,708413~~ Yen, women: ~~10745,109470~~ Yen), but this expenditure  
16  
17 was six to seven times higher for 80-year-olds who have three or four CVD risk factors (men:  
18  
19 ~~974603,351449~~ Yen, women: ~~906,821765,673~~ Yen). The total overspend (excess fraction) was larger  
20  
21 for the non-elderly (men: 150.42%, women: 119.13%) than for the elderly (men: -0.17%, women:  
22  
23 54.27%) and largely driven by people with one or two CVD risk factors, except for elderly men.

24  
25 **Conclusion** ~~Our~~ The age-specific proportion and distribution of medical expenditure attributable  
26  
27 to CVD risk factors quantitative assessments showed that a high-risk approach for the elderly and a  
28  
29 population approach for the majority are both necessary to reduce total medical expenditure in  
30  
31 Japan.

32  
33 **Keywords:** Cost ~~minimization~~ analysis, Cardiovascular disease risk factor, Medical expenditure,  
34  
35 Japan, Elderly population

#### 36 37 38 39 40 41 42 43 44 45 46 47 **Article Focus**

48  
49 >Cardiovascular disease risk factors are often clustered in an individual, which seriously increases  
50  
51 the likelihood of suffering from cardiovascular disease and this clustering of risk factors also  
52  
53

1  
2  
3  
4  
5  
6  
7  
8  
9 increases medical expenses.

10  
11 > The present study examined how age- and sex-specific trends influence total medical expenditure  
12  
13 and assessed how the clustering of CVD risk factors affects the Japanese population.  
14

### 15 16 **Key Messages**

17  
18  
19 >The total overspend of annual medical expenditure is larger for the non-elderly than for the elderly  
20  
21 in Japan.  
22

23  
24 >Larger medical overspends were driven by the groups with one or two risk factors as opposed to  
25  
26 those with three or four risk factors, except for elderly men.  
27

### 28 29 **Strengths and Limitations of This Study**

30  
31  
32 >The statistical modelling technique which we applied was suitable for analysing skewed medical  
33  
34 expenditure data in contrast to a previous paper.  
35

36  
37 >Our focus on the elderly, which is considered to be a vulnerable and sometimes frail group, is  
38  
39 especially important in developed countries where the proportion of the elderly is increasing.  
40

41  
42 >The medical expenditure was evaluated over a relatively short time period (six years) despite  
43  
44 investigating long-term effects, such as stroke and myocardial infarction.  
45

### 46 47 48 49 **Introduction**

50  
51  
52 Hypertension, dyslipidemia, diabetes, and smoking are well-established risk factors for  
53  
54

1  
2  
3  
4  
5  
6  
7  
8  
9 cardiovascular disease (CVD), and the damage caused by these factors is widespread across the  
10 developed world.<sup>1</sup> However, it is also well recognized in the literature that a combination of these  
11 risk factors in an individual increases the risk of CVD.<sup>2</sup> For example, several studies have shown  
12 that the clustering of metabolic risk factors more than doubles the likelihood of CVD mortality.<sup>3,4</sup>  
13  
14 Moreover, from a health economics perspective, these individual CVD risk factors<sup>5-7</sup> and their  
15 combination<sup>8-11</sup> have also been reported to increase total medical expenditure in developed countries.  
16  
17 Indeed, the public health sectors in many western nations are now facing considerable challenges  
18 because of such spiralling medical expenses.  
19  
20  
21  
22  
23  
24  
25  
26  
27

28  
29 From a financial viewpoint, the elderly population (persons aged 65 and over) is the  
30 greatest consumer of medical resources. However, even though it is clear that individual medical  
31 bills differ by age group, few studies have investigated age-specific medical expenses because of  
32 methodological issues, such as insufficient sample sizes and inappropriate statistical models. To help  
33 bridge this gap in the body of knowledge on this topic, a comprehensive community-based database  
34 for medical expenditure, which includes approximately 60,000 individuals, has been developed in  
35 Shiga, Japan. This database consists of individuals' health examinations and their medical expenses  
36 over a three- to five-year period. Exploring this database allows us to perform an age-specific cost  
37  
38  
39  
40  
41  
42  
43  
44  
45  
46  
47  
48  
49  
50 ~~minimization~~-analysis using Gamma regression models, especially for the elderly population. The  
51 present study ~~thus examines how~~~~conducted~~~~examined the~~ age- and sex-specific ~~proportion and~~  
52  
53  
54  
55  
56  
57  
58  
59  
60

1  
2  
3  
4  
5  
6  
7  
8  
9 ~~distribution of medical expenditure attributable for the number of CVD risk factors trends~~  
10  
11 ~~influence quantitative assessments of total medical expenditure and assesses examines how the~~  
12  
13  
14 ~~clustering of CVD risk factors affects in~~ the Japanese population.  
15  
16  
17  
18

## 19 **Methods**

### 20 **The medical expenditure system in Japan**

21  
22  
23  
24 The payment of medical expenses in Japan is based on a public medical insurance  
25  
26 institution that comprises two systems. Since 1961, all Japan residents have been required to enroll  
27  
28 in one of these two insurance systems under the so-called 'health insurance for all' scheme. First, the  
29  
30 National Health Insurance (NHI) scheme covers self-employed workers (e.g. farmers, fishers,  
31  
32 shopkeepers), retirees, and their dependents. The elderly in Japan are thus most often covered by the  
33  
34 NHI scheme. The other insurance system (e.g. Health Insurance Society, Mutual Aid Association)  
35  
36 covers company employees and their dependents. These two systems cover 65.3% and 34.7% of the  
37  
38 Japanese population, respectively. All charges are strictly controlled by a service-specific fee  
39  
40 schedule set by the national government that is constant regardless of insurance system or health  
41  
42  
43  
44  
45  
46  
47 institution.  
48  
49

### 50 **Study population and data**

51  
52 The comprehensive dataset used in this study comprised 64,450 NHI beneficiaries in Shiga  
53  
54

1  
2  
3  
4  
5  
6  
7  
8  
9 prefecture in central Japan. Data on medical expenses and annual health examinations are both key  
10  
11 components of this database. Medical expenses data were collected from the database of the Shiga  
12  
13 Health Insurance Organization, which is a local branch of the NHI. The original database provides  
14  
15 data from April 2000 to March 2006. For the economic evaluation, we ~~calculated~~used a mean annual  
16  
17 medical expenditure ~~as the sum of monthly(per year), which was calculated by summing all~~ medical  
18  
19 expenditure ~~throughout the observation periods and~~ divided by the total ~~periods—of~~  
20  
21 ~~observation.observation periods of months. This monthly-based measure is multiplied twelve to~~  
22  
23 ~~transform a mean medical expenditure (per year).~~ The data of an annual health examination were  
24  
25  
26  
27  
28 provided from every local municipality of Shiga prefecture. In Japan, an annual health examination  
29  
30 was free of charge or inexpensive for all Japanese, which is entitled by the law (Act on Assurance of  
31  
32 Medical Care for Elderly People). Those data were appropriately stored with security protections in  
33  
34 every local municipality. Data on annual health examinations from April 2000, which included the  
35  
36 baseline information for our study, were provided from all 26 local municipalities in Shiga  
37  
38 prefecture. Both medical expenses and health examination measures were merged into the database  
39  
40 using individual identification information (i.e. name, sex, and date of birth) for the administrative  
41  
42 use. This merging process was conducted by the Shiga Health Insurance Organization, the public  
43  
44 agency for paying insurance in Shiga. The anonymous dataset were extracted from the database and  
45  
46  
47  
48  
49  
50  
51  
52 then, participants who displayed signs of blood pressure, serum total cholesterol, casual blood  
53  
54

1  
2  
3  
4  
5  
6  
7  
8  
9 glucose, and smoking habits (see next subsection) were included in the analysis. The participants  
10  
11 who have not censored during whole follow-up period were included in the analysis (n=334,241<sup>39</sup>).  
12  
13

14 Medical research ethics committee approval was granted by the Shiga University of Health Science  
15  
16 Research Ethics Committee (17-20-1).  
17

### 18 19 **Statistical analysis**

20  
21 Specifically, the four CVD risk factors analysed in this study were defined as follows:  
22  
23 hypertension (systolic blood pressure $\geq$ 140 mmHg or diastolic blood pressure $\geq$ 90 mmHg),  
24  
25 hypercholesterolemia (serum total cholesterol $\geq$ 240 mg/dl), high blood glucose (casual blood  
26  
27 glucose $\geq$ 200 mg/dl), and smoking (current smoker). All participants were classified into four  
28  
29 categories (i.e. none, one, two, and three or four) based on these four CVD risk factors. The unit of  
30  
31 medical expenditure was set as Japanese Yen (i.e. 100 Japanese yen (JPY) = 0.81 pounds (GBP), at  
32  
33 the exchange rates published on 10 August 2012).  
34  
35  
36  
37  
38

39 ~~Because data on individual medical expenses differed by the period of subscription to the NHI,~~  
40  
41 ~~individual medical expenses were divided by these periods of subscription and expressed as the~~  
42  
43 ~~mean expenses per year of follow-up. If a beneficiary withdrew from the NHI or died, follow-up was~~  
44  
45 ~~stopped at that point. Follow-up was restarted for beneficiaries who withdrew and then re-enrolled in~~  
46  
47 ~~the NHI.~~  
48  
49  
50  
51

52 A gamma regression model, which is a member of generalized linear models<sup>12</sup>, was used to  
53  
54

Formatted: Indent: First line: 0"

1  
2  
3  
4  
5  
6  
7  
8  
9 estimate the mean ~~annual~~-medical expenditure of the abovementioned four categories after adjusting  
10  
11 for confounding factors. As medical expenditure data usually involve a ~~substantial~~certain proportion  
12  
13 of zeros and some extreme values, their distribution was skewed to the right<sup>13-15</sup>. A gamma  
14  
15 regression is the best modelling approach to deal with this skewness.  
16  
17

18  
19 Statistical models were formulated by sex and age. Specifically, we estimated age-specific  
20  
21 ~~annual~~-medical expenditure (per year) for the following four ages: 50 years, 60 years, 70 years, and  
22  
23 80 years. These estimated expenses were then plotted against the number of CVD risk factors. The  
24  
25 regional variation of local municipalities in Shiga prefecture was considered using the generalized  
26  
27 estimating equation (GEE) approach<sup>12</sup>, which accounts for any correlation within each municipality.  
28  
29

30  
31 To describe how the increasing number of CVD risk factors affects total medical  
32  
33 expenditure in Japan, age-adjusted mean ~~annual~~-medical expenditure and the corresponding number  
34  
35 of participants were also graphed, both for the elderly (aged 65 and over) and for the non-elderly  
36  
37 (aged 40 to 64) populations. The cost ratios and overspend (excess fraction) were also calculated for  
38  
39 each CVD risk factor group. The cost ratio represents the estimated ~~annual~~mean medical expenditure  
40  
41 of the corresponding group divided by the reference (i.e. the no CVD risk factor group), while  
42  
43 overspend was calculated as the proportion of a certain group's excess medical expenditure relative  
44  
45 to the whole population. This overspend can be interpreted as the medical expenditure that would not  
46  
47 have occurred if the participants had possessed no CVD risk factors. All statistical analysis was  
48  
49  
50  
51  
52  
53  
54

1  
2  
3  
4  
5  
6  
7  
8  
9 performed using SAS release 9.20 (SAS Institute Inc., Cary, NC, USA).

## 14 Results

15  
16 Table 1 compares the baseline characteristics of the four CVD risk factor groups. As the  
17 number of CVD risk factors increases, the means of systolic blood pressure, total cholesterol, and  
18 blood glucose and the proportion of current smokers grow in both men and women. The most  
19 prevalent CVD risk factors in the study participants are, first, hypertension in both men and women  
20 followed by smoking in men and cholesterol in women.  
21  
22  
23  
24  
25  
26  
27

28  
29 Figure 1 shows the age-specific estimated annual mean medical expenditure (per year) for  
30 each CVD risk factor group by sex and age. Most age group graphs indicate a gradual increase in  
31 medical expenditure as the number of CVD risk factors rises for both men and women. This figure  
32 shows that the mean annual medical expenditure (per year) for the no CVD risk factor group is just  
33 1130,000 Yen at age 50 (men: 11033,708413 Yen, women: 107,10915,470 Yen), but that this  
34 expenditure is sex to seven times higher for 80-year-olds who have three or four CVD risk factors  
35 (men: 974603,351,449 Yen, women: 906,821765,673 Yen).  
36  
37  
38  
39  
40  
41  
42  
43  
44  
45  
46

47 Figure 2 shows the distribution of the number of CVD risk factors and their corresponding  
48 mean annual medical expenditure (per year) for the four subgroups (i.e. non-elderly men, elderly  
49 men, non-elderly women, elderly women) adjusted by age. The corresponding cost ratios and  
50  
51  
52  
53  
54



1  
2  
3  
4  
5  
6  
7  
8  
9 overspends (excess fractions) in each group are also shown by sex and age. The adjusted  
10  
11 ~~annual~~ mean medical expenditure increases as the number of CVD risk factors rises, meaning that the  
12  
13  
14 cost ratio for the group with three or four CVD risk factors increases by more than 40% relative to  
15  
16 the reference group. These trends were most obvious in ~~non-elderly men~~ elderly women (cost ratio:  
17  
18 1.7486). The total overspend was larger in the non-elderly population (men: 1.50.42%, women:  
19  
20 119.13%) than it was in the elderly (men: -0.17%, women: 54.27%). The total overspend was mostly  
21  
22 driven by the groups with one (non-elderly men: 63.86%, non-elderly women: 74.49%, elderly  
23  
24 women: 3.70%) or two risk factors (non-elderly men: 65.84%, non-elderly women: 34.51%, elderly  
25  
26 women: 1.34%) compared with three or four risk factors (non-elderly men: 1.82%, non-elderly  
27  
28 women: 0.23%, elderly women: 0.23%), with the exception of elderly men.  
29  
30  
31  
32  
33  
34  
35  
36

### 37 Discussion

38  
39 We performed a community-based cost ~~minimization~~ analysis to investigate the sex- and  
40  
41 age-specific effects of CVD risk factor clustering on total medical expenditure in Japan. We  
42  
43 measured the relative increases (cost ratios) and population impacts (overspends) and found that  
44  
45 annual medical expenditure increases as the number of CVD risk factors rises in all age and sex  
46  
47 groups. While the relative increase in the group with three or four CVD risk factors was greatest, the  
48  
49 population impacts on total medical expenditure were larger among the group with one or two CVD  
50  
51  
52  
53  
54

1  
2  
3  
4  
5  
6  
7  
8  
9 risk factors.

10  
11 The findings from the Framingham study have already shown that Medicare costs increase  
12 with combinations of risk factors, such as hypertension, smoking, and hypercholesterolemia.<sup>8</sup>  
13  
14 Studies from the United States<sup>9</sup> and Japan<sup>10,11</sup> have also shown similar increasing patterns in the  
15  
16 community setting. Our study showed that the cost ratios in the three or four CVD risk factor group  
17  
18 were between 1.44 and 1.74, which are similar to the values found in the Framingham study<sup>8</sup> and  
19  
20 another study in Japan<sup>10</sup>. However, other studies have found relatively larger ratios, such as 1.84–  
21  
22 2.45 in the United States<sup>9</sup> and 1.91 in Japan<sup>11</sup>, since medical expenditure is largely affected by the  
23  
24 insurance system, study participants, and the region. The different characteristics of these previous  
25  
26 studies, such as the definition of risk factors, length of study periods, and estimation procedures  
27  
28 (statistical models), also affect their results.  
29  
30  
31  
32  
33  
34  
35

36  
37 The strength of our study is that the statistical modelling technique applied was suitable for  
38  
39 analysing skewed medical expenditure data in contrast to a previous paper. [The guideline from the](#)  
40  
41 [International Society of Pharmacoeconomics and Outcome Research \(ISPOR\) recommended using](#)  
42  
43 [this statistical model in the cost data analysis<sup>13\)</sup>. The cost data often show a skewed distribution,](#)  
44  
45 [which violated the equidispersion property of mean and variance. In a case with a certain proportion](#)  
46  
47 [of zeros, a Gamma regression is most suitable statistical model, which assumed the extra-variation](#)  
48  
49 [\(overdispersion\) of the outcome.](#) We applied a Gamma regression model<sup>12–15</sup> for the cost  
50  
51  
52  
53  
54

1  
2  
3  
4  
5  
6  
7  
8  
9 minimization analysis<sup>16</sup> in order to investigate in-depth sex- and age-specific attributes, which is  
10  
11 difficult in a stratified analysis. Our focus on the elderly is especially important in developed  
12  
13 countries, where the ageing population is increasing the proportion of the elderly, which is  
14  
15 considered to be a vulnerable and sometimes frail group.  
16  
17

18  
19 It is important to note that individual medical expenses were highest in the three or four  
20  
21 CVD risk factor group for all subgroups. This population would thus be the main target for high-risk  
22  
23 approaches to contain medical expenditure growth. High-risk strategies, such as comprehensive  
24  
25 health guidance by public health nurses, dieticians, or physicians, can be readily understood and they  
26  
27 can strongly motivate people to change their lifestyles to manage CVD risk factors.  
28  
29  
30

31  
32 However, from the viewpoint of total medical expenditure, people with one or two CVD  
33  
34 risk factors are not negligible. This population had a greater influence on total medical expenditure  
35  
36 than did the high-CVD risk factor group, especially in the non-elderly, which accounted for more  
37  
38 than 109% of total medical expenditure when the one and two CVD risk factor groups were  
39  
40 combined compared with 54.04% for elderly women and -0.07% for elderly men. However, it is  
41  
42 difficult to implement effective high-risk strategies because of the large population of people with  
43  
44 one or two CVD risk factors. For this group, a population strategy may be useful for gradually  
45  
46 lowering the distribution of CVD risk factors<sup>17</sup>.  
47  
48  
49  
50

51  
52 The present study has several limitations. ~~First, because the public medical insurance~~  
53  
54

1  
2  
3  
4  
5  
6  
7  
8  
9 ~~system in Japan is different from those in other developed countries, we should be cautious when~~  
10 ~~comparing the absolute values of medical expenses for participants in the present study.~~  
11 ~~First, details~~  
12 ~~of medical diagnoses, medical treatment status (e.g. prescriptions), clinical condition such as CVD~~  
13 ~~history, and cause of mortality were unavailable in this study. It is true that the medical treatment~~  
14 ~~status and the clinical conditions are key elements of increasing medical expenditure. Our reference~~  
15 ~~group contained both the non-prescribed (healthy population) and the prescribed. This might~~  
16 ~~overestimate the “referent” mean medical expenditure. From this viewpoint, the relative measures~~  
17 ~~(cost ratios) of CVD risk factors might be underestimated in this study.~~ Second, medical expenditure  
18  
19 was evaluated over a relatively short time period (six years) despite investigating long-term effects.  
20  
21 As severe health events such as stroke and myocardial infarction can occur after a long interval in  
22  
23 high-risk individuals, excess medical expenditure might be underestimated. Third, data on fasting  
24  
25 blood glucose, triglycerides, and HDL-cholesterol were unavailable. ~~Finally, details of medical~~  
26 ~~diagnoses, medical treatment status (e.g. prescriptions), clinical condition such as CVD history, and~~  
27 ~~cause of mortality were unavailable. Thus, further studies are required to clarify the effects of these~~  
28 ~~variables.~~ Finally, because the public medical insurance system in Japan is different from those in  
29  
30 other developed countries, we should be cautious when comparing the absolute values of medical  
31  
32 expenses for participants in the present study.  
33  
34  
35  
36  
37  
38  
39  
40  
41  
42  
43  
44  
45  
46  
47  
48  
49  
50  
51

52 In conclusion, this investigation into the sex- and age-specific effects of CVD risk factors  
53  
54

1  
2  
3  
4  
5  
6  
7  
8  
9 on medical expenditure in Japan showed a large relative increase in people with three or four CVD  
10  
11 risk factors. However, the population impacts on total medical expenditure were larger among  
12  
13 people with one or two CVD risk factors, especially in non-elderly women. A high-risk approach for  
14  
15 people with three or four CVD risk factors and a population approach for the majority are thus both  
16  
17 necessary to reduce total medical expenditure in Japan.  
18  
19  
20  
21  
22  
23

#### 24 **Contributors**

25  
26 YM was involved in database management, data analysis, data interpretation and wrote the  
27  
28 manuscript. TO designed the study and was involved in database management, data interpretation  
29  
30 and wrote the manuscript. KN was involved in data interpretation and writing the manuscript. KM  
31  
32 was involved in data interpretation and writing the manuscript. UH was involved in data  
33  
34 interpretation and writing the manuscript.  
35  
36  
37  
38

#### 39 **Funding**

40  
41 This research was supported by a Grant-in-Aid for Scientific Research (C) from the Japan Society  
42  
43 for the Promotion of Science (22590585) and Grants-in-Aid from the Ministry of Health, Labor and  
44  
45 Welfare, Health and Labor Sciences Research Grants, Japan (Research on Health Services:  
46  
47 H17-Kenkou-007; Comprehensive Research on Cardiovascular and Life-Style Related Diseases:  
48  
49 H18-Junkankitou [Seishuu]-Ippan-012; Comprehensive Research on Cardiovascular and Life-Style  
50  
51  
52  
53  
54

1  
2  
3  
4  
5  
6  
7  
8  
9 Related Diseases: H20-Junkankitou [Seishuu]-Ippan-013; Comprehensive Research on Life-Style

10 Related Diseases including Cardiovascular Diseases and Diabetes Mellitus: H20-Junkankitou

11  
12 [Seishuu]-Ippan-013 and Comprehensive Research on Life-Style Related Diseases including

13  
14  
15  
16 Cardiovascular Diseases and Diabetes Mellitus: H23-Junkankitou [Seishuu]-Ippan-005).

17  
18  
19 **Competing interests**

20  
21 None

22  
23  
24 **Ethics approval**

25  
26  
27 Medical research ethics committee approval was granted by the Shiga University of Health Science

28  
29  
30 Research Ethics Committee (17-20-1).

31  
32 **Provenance and peer review**

33  
34 Not commissioned; externally peer reviewed.

35  
36  
37 **Data sharing statement**

38  
39 No additional data are available.

40  
41  
42  
43  
44 **References**

- 45  
46  
47 1. Ezzati M, Hoorn SV, Rodgers A, Lopez AD, Mathers CD, Murray CJ; Comparative Risk  
48  
49 Assessment Collaborating Group. Estimates of global and regional potential health gains from  
50  
51 reducing multiple major risk factors. *Lancet* 2003;362:271–80.  
52  
53  
54

- 1  
2  
3  
4  
5  
6  
7  
8  
9 2. Greenland P, Knoll MD, Stamler J, Neaton JD, Dyer AR, Garside DB, Wilson PW. Major risk  
10 factors as antecedents of fatal and nonfatal coronary heart disease events. *JAMA* 2003;290:891–  
11  
12  
13  
14 7.  
15  
16 3. Kadota A, Hozawa A, Okamura T, Kadowak T, Nakamura K, Murakami Y, Hayakawa T, Kita Y,  
17 Okayama A, Nakamura Y, Kashiwagi A, Ueshima H; NIPPON DATA Research Group.  
18 Relationship between metabolic risk factor clustering and cardiovascular mortality stratified by  
19 high blood glucose and obesity: NIPPON DATA90, 1990–2000. *Diabetes Care* 2007;30:1533–8.  
20  
21  
22  
23  
24  
25  
26 4. McNeill AM, Rosamond WD, Girman CJ, Golden SH, Schmidt MI, East HE, Ballantyne CM,  
27 Heiss G. The metabolic syndrome and 11-year risk of incident cardiovascular disease in the  
28 atherosclerosis risk in communities study. *Diabetes Care* 2005;28:385–90.  
29  
30  
31  
32  
33  
34 5. Nakamura K, Okamura T, Kanda H, Hayakawa T, Okayama A, Ueshima H; Health Promotion  
35 Research Committee of the Shiga National Health Insurance Organizations. Medical costs of  
36 patients with hypertension and/or diabetes: A 10-year follow-up study of National Health  
37 Insurance in Shiga, Japan. *J Hypertens* 2006;24:2305–9.  
38  
39  
40  
41  
42  
43  
44 6. Izumi Y, Tsuji I, Ohkubo T, Kuwahara A, Nishino Y, Hisamichi S Impact of smoking habit on  
45 medical care use and its costs: a prospective observation of National Health Insurance  
46 beneficiaries in Japan. *Int J Epidemiol.* 2001;30:616–21  
47  
48  
49  
50  
51  
52 7. Daviglus ML, Liu K, Yan LL, et al. Relation of body mass index in young adulthood and middle  
53  
54

- 1  
2  
3  
4  
5  
6  
7  
8  
9 age to Medicare expenditures in older age. *JAMA*. 2004;292:2743–9.
- 10  
11 8. Schauffler HH, D’Agostino RB, Kannel WB. Risk for cardiovascular disease in the elderly and  
12 associated Medicare costs: The Framingham Study. *Am J Prev Med* 1993;9:146–54.
- 13  
14  
15 9. Daviglius ML, Liu K, Greenland P, Dyer AR, Garside DB, Manheim L, et al. Benefit of a  
16 favorable cardiovascular risk-factor profile in middle age with respect to Medicare costs. *N Engl*  
17  
18  
19  
20  
21  
22  
23  
24  
25 10. Okamura T, Nakamura K, Kanda H, et al. Effect of combined cardiovascular risk factors on  
26 individual and population medical expenditures – A 10-year cohort study of national health  
27 insurance in a Japanese population. *Circ J* 2007;71:807–13
- 28  
29  
30  
31  
32 11. Ohmori-Matsuda K, Kuriyama S, Hozawa A, Nakaya N, Shimazu T, Tsuji I. The joint impact of  
33 cardiovascular risk factors upon medical costs. *Prev Med*. 2007;44:349–55.
- 34  
35  
36  
37 12. Fitzmaurice GM, Laird NM, Ware JH. Applied Longitudinal Analysis Second Edition. New  
38 Jersey: John Wiley & Sons, 2011.
- 39  
40  
41  
42 13. Ramsey S, Willke R, Briggs A et al. Good research practices for cost-effectiveness analysis  
43 alongside clinical trials: the ISPOR RCT-CEA Task Force report. *Value Health*. 2005;8:521–33.
- 44  
45  
46  
47 14. Basu A, Manning WG. Issues for the next generation of health care cost analyses. *Med Care*.  
48 2009;7 (Suppl 1):S109–14.
- 49  
50  
51  
52 15. Manning WG, Basu A, Mullahy J. Generalized modeling approaches to risk adjustment of  
53  
54



1  
2  
3  
4  
5  
6  
7  
8  
9  
10  
11  
12  
13  
14  
15  
16  
17  
18  
19  
20  
21  
22  
23  
24  
25  
26  
27  
28  
29  
30  
31  
32  
33  
34  
35  
36  
37  
38  
39  
40  
41  
42  
43  
44  
45  
46  
47  
48  
49  
50  
51  
52  
53  
54  
55  
56  
57  
58  
59  
60

skewed outcomes data. *J Health Econ.* 2005;24:465–88.

16. Glick HA, Doshi JA, Sonnad SS, Polsky D. *Economic Evaluation in Clinical Trials*. New York: Oxford University Press, 2007.

17 · Rose G. Sick individuals and sick populations. *Int J Epidemiol* 1985;14:32–8.

For peer review only

Table 1. The baseline characteristics of study participants, Shiga prefectural follow-up study of medical expenditure, 2000–2006

|                        | Number of cardiovascular risk factors* |                        |                      |                    |      |    |     |      |    |        |      |     |
|------------------------|----------------------------------------|------------------------|----------------------|--------------------|------|----|-----|------|----|--------|------|-----|
|                        | 0                                      |                        |                      | 1                  |      |    | 2   |      |    | 3 or 4 |      |     |
|                        | Men:4890; women:11,737                 | Men:6892; women:10,520 | Men:2337; women:2362 | Men:262; women:114 | Mean | SD | %** | Mean | SD | %**    | Mean | SD  |
| <b>Men</b>             |                                        |                        |                      |                    |      |    |     |      |    |        |      |     |
| Age                    | 70                                     | 11                     | -                    | 68                 | 11   | -  | 67  | 10   | -  | 65     | 10   | -   |
| Systolic blood pressur | 123                                    | 11                     | 0                    | 138                | 19   | 54 | 148 | 17   | 87 | 151    | 14   | 96  |
| Total cholestero       | 187                                    | 28                     | 0                    | 191                | 31   | 5  | 201 | 41   | 23 | 231    | 41   | 65  |
| Blood glucose          | 104                                    | 24                     | 0                    | 107                | 30   | 1  | 118 | 51   | 8  | 187    | 95   | 49  |
| Current smokers        | -                                      | -                      | 0                    | -                  | -    | 39 | -   | -    | 82 | -      | -    | 94  |
| <b>Women</b>           |                                        |                        |                      |                    |      |    |     |      |    |        |      |     |
| Age                    | 66                                     | 11                     | -                    | 69                 | 10   | -  | 68  | 10   | -  | 66     | 10   | -   |
| Systolic blood pressur | 122                                    | 12                     | 0                    | 143                | 18   | 70 | 150 | 16   | 92 | 155    | 15   | 100 |
| Total cholestero       | 199                                    | 25                     | 0                    | 214                | 34   | 23 | 248 | 33   | 80 | 260    | 28   | 91  |
| Blood glucose          | 98                                     | 19                     | 0                    | 102                | 27   | 1  | 114 | 50   | 8  | 174    | 93   | 44  |
| Current smokers        | -                                      | -                      | 0                    | -                  | -    | 7  | -   | -    | 20 | -      | -    | 68  |

  

|                         | Number of cardiovascular risk factors* |                      |                      |                   |      |    |     |      |    |        |      |     |
|-------------------------|----------------------------------------|----------------------|----------------------|-------------------|------|----|-----|------|----|--------|------|-----|
|                         | 0                                      |                      |                      | 1                 |      |    | 2   |      |    | 3 or 4 |      |     |
|                         | Men:4187; women:9924                   | Men:5947; women:8953 | Men:1945; women:1964 | Men:206; women:87 | Mean | SD | %** | Mean | SD | %**    | Mean | SD  |
| <b>Men</b>              |                                        |                      |                      |                   |      |    |     |      |    |        |      |     |
| Age                     | 70                                     | 10                   | -                    | 68                | 11   | -  | 67  | 10   | -  | 65     | 10   | -   |
| Systolic blood pressure | 124                                    | 11                   | 0                    | 138               | 19   | 55 | 148 | 17   | 87 | 151    | 15   | 96  |
| Total cholestero        | 188                                    | 27                   | 0                    | 191               | 31   | 5  | 202 | 41   | 23 | 234    | 39   | 68  |
| Blood glucose           | 103                                    | 23                   | 0                    | 106               | 29   | 1  | 118 | 50   | 8  | 178    | 94   | 45  |
| Current smokers         | -                                      | -                    | 0                    | -                 | -    | 38 | -   | -    | 82 | -      | -    | 94  |
| <b>Women</b>            |                                        |                      |                      |                   |      |    |     |      |    |        |      |     |
| Age                     | 66                                     | 11                   | -                    | 69                | 10   | -  | 68  | 9    | -  | 66     | 9    | -   |
| Systolic blood pressure | 122                                    | 12                   | 0                    | 143               | 18   | 70 | 150 | 15   | 93 | 156    | 15   | 100 |
| Total cholestero        | 200                                    | 24                   | 0                    | 214               | 34   | 23 | 249 | 32   | 82 | 261    | 23   | 94  |
| Blood glucose           | 98                                     | 19                   | 0                    | 102               | 27   | 1  | 112 | 46   | 7  | 168    | 92   | 39  |
| Current smokers         | -                                      | -                    | 0                    | -                 | -    | 6  | -   | -    | 18 | -      | -    | 70  |

\* The four CVD risk factors analysed in this study were defined as follows: hypertension (systolic blood pressure  $\geq 140$  mmHg or diastolic blood pressure  $\geq 90$  mmHg), hypercholesterolemia (total cholesterol  $\geq 240$  mg/dl), high blood glucose (casual blood glucose  $\geq 200$  mg/dl), and smoking (current smoker).

\*\* For each CVD risk factor, the proportions (%) of participants who possess this risk factor are shown in each category.

1  
2  
3  
4  
5  
6  
7  
8  
9  
10  
11  
12  
13  
14  
15  
16  
17  
18  
19  
20  
21  
22  
23  
24  
25  
26  
27  
28  
29  
30  
31  
32  
33  
34  
35  
36  
37  
38  
39  
40  
41  
42  
43  
44  
45  
46  
47  
48  
49  
50  
51  
52  
53  
54  
55  
56  
57  
58  
59  
60

For peer review only



### Figure legends

Figure 1. The age- and sex-specific estimated annual mean medical expenditure (per year) by CVD risk factor group.

The Gamma regression was used to estimate the mean medical expenditure in the model. The black rectangles show the annual mean medical expenditure (per year) of each CVD risk factor group and the corresponding solid lines show their 95% confidence intervals.

Figure 2. The distribution of the number of CVD risk factors, their estimated mean annual-medical expenditure, (per year), and overspend in the population: (A) men aged 40 to 64, (B) men aged 65 and over, (C) women aged 40 to 64, and (D) women aged 65 and over.

The Gamma regression was used to estimate the mean medical expenditure in the model. The overspend is the difference between the expenditure of each category and the reference (i.e. the no CVD risk factor group). This was defined as the proportion of excess expenditure relative to total medical expenditure.

## Additional file 1

EVEREST Statement: Checklist for health economics paper

|                                                                                                                                                | Study section            | Additional remarks |
|------------------------------------------------------------------------------------------------------------------------------------------------|--------------------------|--------------------|
| <b>Study design</b>                                                                                                                            |                          |                    |
| (1) The research question is stated                                                                                                            | Introduction             |                    |
| (2) The economic importance of the research question is stated                                                                                 | Introduction             |                    |
| (3) The viewpoint(s) of the analysis are clearly stated and justified                                                                          | Methods                  |                    |
| (4) The rationale for choosing the alternative programmes or interventions compared is stated                                                  | Introduction and Methods |                    |
| (5) The alternatives being compared are clearly described                                                                                      | Introduction and Methods |                    |
| (6) The form of economic evaluation used is stated                                                                                             | Introduction and Methods |                    |
| (7) The choice of form of economic evaluation is justified in relation to the questions addressed                                              | Introduction and Methods |                    |
|                                                                                                                                                |                          |                    |
| <b>Data collection</b>                                                                                                                         |                          |                    |
| (8) The source(s) of effectiveness estimates used are stated                                                                                   | Methods                  |                    |
| (9) Details of the design and results of effectiveness study are given (if based on single study)                                              | Methods                  |                    |
| (10) Details of the method of synthesis or meta-analysis of estimates are given (if based on an overview of a number of effectiveness studies) | N/A                      |                    |
| (11) The primary outcome measure(s) for the economic evaluation are clearly stated                                                             | Methods                  |                    |
| (12) Methods to value health states and other benefits are stated                                                                              | N/A                      |                    |
| (13) Details of the subjects from whom valuations were obtained are given                                                                      | N/A                      |                    |
| (14) Productivity changes (if included) are reported separately                                                                                | N/A                      |                    |
| (15) The relevance of productivity changes to the study question is discussed                                                                  | N/A                      |                    |
| (16) Quantities of resources are reported separately from their unit costs                                                                     | Methods                  |                    |
| (17) Methods for the estimation of quantities and unit costs are described                                                                     | Methods                  |                    |
| (18) Currency and price data are recorded                                                                                                      | Methods                  |                    |
| (19) Details of currency of price adjustments for inflation or currency conversion are given                                                   | N/A                      |                    |

|                                                                                          |                   |  |
|------------------------------------------------------------------------------------------|-------------------|--|
| (20) Details of any model used are given                                                 | Methods           |  |
| (21) The choice of model used and the key parameters on which it is based are justified  | Methods           |  |
|                                                                                          |                   |  |
| <b>Analysis and interpretation of results</b>                                            |                   |  |
| (22) Time horizon of costs and benefits is stated                                        | Methods           |  |
| (23) The discount rate(s) is stated                                                      | N/A               |  |
| (24) The choice of rate(s) is justified                                                  | N/A               |  |
| (25) An explanation is given if costs or benefits are not discounted                     | N/A               |  |
| (26) Details of statistical tests and confidence intervals are given for stochastic data | Methods           |  |
| (27) The approach to sensitivity analysis is given                                       | N/A               |  |
| (28) The choice of variables for sensitivity analysis is justified                       | N/A               |  |
| (29) The ranges over which the variables are varied are stated                           | N/A               |  |
| (30) Relevant alternatives are compared                                                  | Methods           |  |
| (31) Incremental analysis is reported                                                    | N/A               |  |
| (32) Major outcomes are presented in a disaggregated as well as aggregated form          | Table and Figures |  |
| (33) The answer to the study question is given                                           | Discussion        |  |
| (34) Conclusions follow from the data reported                                           | Discussion        |  |
| (35) Conclusions are accompanied by the appropriate caveats                              | Discussion        |  |



**The clustering of cardiovascular disease risk factors and their impacts on annual medical expenditure in Japan: community-based cost analysis using Gamma regression models**

|                                 |                                                                                                                                                                                                                                                                                                                                                                                                |
|---------------------------------|------------------------------------------------------------------------------------------------------------------------------------------------------------------------------------------------------------------------------------------------------------------------------------------------------------------------------------------------------------------------------------------------|
| Journal:                        | <i>BMJ Open</i>                                                                                                                                                                                                                                                                                                                                                                                |
| Manuscript ID:                  | bmjopen-2012-002234.R3                                                                                                                                                                                                                                                                                                                                                                         |
| Article Type:                   | Research                                                                                                                                                                                                                                                                                                                                                                                       |
| Date Submitted by the Author:   | 21-Feb-2013                                                                                                                                                                                                                                                                                                                                                                                    |
| Complete List of Authors:       | Murakami, Yoshitaka ; Shiga University of Medical Science, Medical Statistics<br>Okamura, Tomonori; Keio University, Preventive Medicine and Public Health<br>Nakamura, Koshi; Kanazawa Medical University, Epidemiology and Public Health<br>Miura, katsuyuki; Shiga University of Medical Science, Health Science<br>Ueshima, Hirotsugu; Shiga University of Medical Science, Health Science |
| <b>Primary Subject Heading</b>: | Health economics                                                                                                                                                                                                                                                                                                                                                                               |
| Secondary Subject Heading:      | Epidemiology, Cardiovascular medicine, Public health                                                                                                                                                                                                                                                                                                                                           |
| Keywords:                       | Cost analysis, Cardiovascular disease risk factor, Medical expenditure, Japan, Elderly population                                                                                                                                                                                                                                                                                              |
|                                 |                                                                                                                                                                                                                                                                                                                                                                                                |

SCHOLARONE™  
Manuscripts

only

1  
2  
3  
4  
5  
6 **The clustering of cardiovascular disease risk factors and their impacts on annual medical**  
7  
8  
9 **expenditure in Japan: community-based cost analysis using Gamma regression models**  
10  
11

12  
13  
14  
15 Yoshitaka Murakami, Tomonori Okamura, Koshi Nakamura, Katsuyuki Miura, Hirotsugu Ueshima  
16  
17

18  
19  
20 Yoshitaka Murakami associate professor Department of Medical Statistics, Shiga University of  
21  
22  
23 Medical Science, Seta Tsukinowa-cho, Otsu, Shiga 520-2192, Japan Tomonori Okamura professor  
24  
25  
26 Department of Preventive Medicine and Public Health, Keio University, Shinano-machi 35,  
27  
28  
29 Shinjuku-ku, Tokyo 160-8582, Japan Koshi Nakamura associate professor Department of  
30  
31  
32 Epidemiology and Public Health, Kanazawa Medical University, 1-1 Daigaku, Uchinada, Ishikawa  
33  
34  
35 920-0293, Japan Katsuyuki Miura professor Department of Health Science, Shiga University of  
36  
37  
38 Medical Science, Otsu, Seta Tsukinowa-cho, Otsu, Shiga 520-2192, Japan Hirotsugu Ueshima  
39  
40  
41 professor Lifestyle-related Disease Prevention Centre, Shiga University of Medical Science, Seta  
42  
43  
44 Tsukinowa-cho, Otsu, Shiga 520-2192, Otsu, Japan Department of Health Science, Shiga University  
45  
46  
47 of Medical Science, Otsu, Japan  
48  
49  
50  
51

52  
53 Correspondence to: Y Murakami [ymura@belle.shiga-med.ac.jp](mailto:ymura@belle.shiga-med.ac.jp)  
54  
55  
56  
57  
58  
59  
60



**Abstract**

**Objective** The clustering of cardiovascular disease (CVD) risk factors is a serious threat for increasing medical expenses. The age-specific proportion and distribution of medical expenditure attributable to CVD risk factors, especially focused on the elderly, is thus indispensable for formulating public health policy given the extent of the ageing population in developed countries.

**Design** Cost analysis using individuals' medical expenses and their corresponding health examination measures.

**Setting** Shiga prefecture, Japan, from April 2000 to March 2006.

**Participants** 33,213 participants aged 40 years and over

**Main outcome measures** Mean medical expenditure per year.

**Methods** Gamma regression models were applied to examine how the number of CVD risk factors affects mean medical expenditure. The four CVD risk factors analysed in this study were defined as follows: hypertension (systolic blood pressure  $\geq 140$  mmHg or diastolic blood pressure  $\geq 90$  mmHg), hypercholesterolemia (serum total cholesterol  $\geq 240$  mg/dl), high blood glucose (casual blood glucose  $\geq 200$  mg/dl), and smoking (current smoker). Sex- and age-specific investigations were carried out on the elderly (aged 65 and over) and non-elderly (aged 40 to 64) populations.

**Results** The mean medical expenditure (per year) for the no CVD risk factor group was only 110,000 Yen at age 50 (men: 110,708 Yen, women: 107,109 Yen), but this expenditure was six to

1  
2  
3  
4  
5  
6 seven times higher for 80-year-olds who have three or four CVD risk factors (men:603,351 Yen,  
7  
8  
9 women: 765,673 Yen). The total overspend (excess fraction) was larger for the non-elderly (men:  
10  
11  
12 15.4%, women: 11.1%) than for the elderly (men: 0.1%, women: 5.2%) and largely driven by people  
13  
14  
15 with one or two CVD risk factors, except for elderly men.

16  
17  
18 **Conclusion** The age-specific proportion and distribution of medical expenditure attributable to CVD  
19  
20  
21 risk factors showed that a high-risk approach for the elderly and a population approach for the  
22  
23  
24 majority are both necessary to reduce total medical expenditure in Japan.

25  
26 **Keywords:** Cost analysis, Cardiovascular disease risk factor, Medical expenditure, Japan, Elderly  
27  
28  
29 population  
30  
31  
32  
33  
34

### 35 **Article Focus**

36  
37  
38 >Cardiovascular disease risk factors are often clustered in an individual, which seriously increases  
39  
40  
41 the likelihood of suffering from cardiovascular disease and this clustering of risk factors also  
42  
43  
44 increases medical expenses.

45  
46  
47 > The present study examined age and sex specific clustering of cardiovascular risk factors, and how  
48  
49  
50 it affected medical expenditure in the Japanese population.

### 51 **Key Messages**

52  
53  
54  
55 >The total overspends attributable to cardiovascular risk factors is larger among the non-elderly  
56  
57  
58  
59  
60

1  
2  
3  
4  
5  
6 population in Japan.

7  
8  
9 >Larger medical overspends were driven by the groups with one or two risk factors rather than by  
10  
11 those with three or four, except for men aged 65 and over.

### 12 13 14 **Strengths and Limitations of This Study**

15  
16  
17 >The statistical modelling technique which we applied was suitable for analysing skewed medical  
18  
19 expenditure data in contrast to a previous paper.

20  
21  
22 > The use of large comprehensive community-based database of health examination and medical  
23  
24 expenditure brought us the stratified information by sex and age.

25  
26  
27 >Our focus on the elderly, which is considered to be a vulnerable and sometimes frail group, is  
28  
29 especially important in developed countries where the proportion of the elderly is increasing.

30  
31  
32 >The medical expenditure was evaluated over a relatively short time period (six years) despite  
33  
34 investigating long-term effects, such as stroke and myocardial infarction.

### 35 36 37 38 39 40 41 42 43 **Introduction**

44  
45  
46 Hypertension, dyslipidemia, diabetes, and smoking are well-established risk factors for  
47  
48 cardiovascular disease (CVD), and the damage caused by these factors is widespread across the  
49  
50 developed world.<sup>1</sup> However, it is also well recognized in the literature that a combination of these  
51  
52 risk factors in an individual increases the risk of CVD.<sup>2</sup> For example, several studies have shown  
53  
54  
55  
56  
57  
58  
59  
60

1  
2  
3  
4  
5  
6 that the clustering of metabolic risk factors more than doubles the likelihood of CVD mortality.<sup>3,4</sup>

7  
8  
9 Moreover, from a health economics perspective, these individual CVD risk factors<sup>5-7</sup> and their  
10  
11 combination<sup>8-11</sup> have also been reported to increase total medical expenditure in developed countries.

12  
13  
14 Indeed, the public health sectors in many western nations are now facing considerable challenges  
15  
16 because of such spiralling medical expenses.  
17  
18

19  
20 From a financial viewpoint, the elderly population (persons aged 65 and over) is the  
21  
22 greatest consumer of medical resources. However, even though it is clear that individual medical  
23  
24 bills differ by age group, few studies have investigated age-specific medical expenses because of  
25  
26 methodological issues, such as insufficient sample sizes and inappropriate statistical models. To help  
27  
28 bridge this gap in the body of knowledge on this topic, a comprehensive community-based database  
29  
30 for medical expenditure, which includes approximately 60,000 individuals, has been developed in  
31  
32 Shiga, Japan. This database consists of individuals' health examinations and their medical expenses  
33  
34 over a three- to five-year period. Exploring this database allows us to perform an age-specific cost  
35  
36 analysis using Gamma regression models, especially for the elderly population. The present study  
37  
38 examined the age- and sex-specific proportion and distribution of medical expenditure attributable  
39  
40 for the number of CVD risk factors in the Japanese population.  
41  
42  
43  
44  
45  
46  
47  
48  
49  
50

## 51 52 53 54 55 **Methods** 56 57 58 59 60

## The medical expenditure system in Japan

The payment of medical expenses in Japan is based on a public medical insurance institution that comprises two systems. Since 1961, all Japan residents have been required to enroll in one of these two insurance systems under the so-called 'health insurance for all' scheme. First, the National Health Insurance (NHI) scheme covers self-employed workers (e.g. farmers, fishers, shopkeepers), retirees, and their dependents. The elderly in Japan are thus most often covered by the NHI scheme. The other insurance system (e.g. Health Insurance Society, Mutual Aid Association) covers company employees and their dependents. These two systems cover 65.3% and 34.7% of the Japanese population, respectively. All charges are strictly controlled by a service-specific fee schedule set by the national government that is constant regardless of insurance system or health institution.

## Study population and data

The comprehensive dataset used in this study comprised 64,450 NHI beneficiaries in Shiga prefecture in central Japan. Data on medical expenses and annual health examinations are both key components of this database. Medical expenses data were collected from the database of the Shiga Health Insurance Organization, which is a local branch of the NHI. The original database provides data from April 2000 to March 2006. For the economic evaluation, we used a mean medical expenditure (per year), which was calculated by summing all medical expenditure throughout the

1  
2  
3  
4  
5  
6 observation periods and divided by the total observation periods of months. This monthly-based  
7  
8  
9 measure is multiplied twelve to transform a mean medical expenditure (per year). The data of an  
10  
11  
12 annual health examination were provided from every local municipality of Shiga prefecture. In Japan,  
13  
14  
15 an annual health examination was free of charge or inexpensive for all Japanese, which is entitled by  
16  
17  
18 the law (Act on Assurance of Medical Care for Elderly People). Those data were appropriately  
19  
20  
21 stored with security protections in every local municipality. Data on annual health examinations  
22  
23  
24 from April 2000, which included the baseline information for our study, were provided from all 26  
25  
26  
27 local municipalities in Shiga prefecture. Both medical expenses and health examination measures  
28  
29  
30 were merged into the database using individual identification information (i.e. name, sex, and date of  
31  
32  
33 birth) for the administrative use. This merging process was conducted by the Shiga Health Insurance  
34  
35  
36 Organization, the public agency for paying insurance in Shiga. The anonymous dataset were  
37  
38  
39 extracted from the database and then, participants who displayed signs of blood pressure, serum total  
40  
41  
42 cholesterol, casual blood glucose, and smoking habits (see next subsection) were included in the  
43  
44  
45 analysis. The participants who have not censored during whole follow-up period were included in  
46  
47  
48 the analysis (n=33,213). Medical research ethics committee approval was granted by the Shiga  
49  
50  
51 University of Health Science Research Ethics Committee (17-20-1).

### 52 **Statistical analysis**

53  
54  
55 Specifically, the four CVD risk factors analysed in this study were defined as follows: hypertension  
56  
57  
58

1  
2  
3  
4  
5  
6 (systolic blood pressure $\geq$ 140 mmHg or diastolic blood pressure $\geq$ 90 mmHg), hypercholesterolemia  
7  
8  
9 (serum total cholesterol $\geq$ 240 mg/dl), high blood glucose (casual blood glucose $\geq$ 200 mg/dl), and  
10  
11 smoking (current smoker). All participants were classified into four categories (i.e. none, one, two,  
12  
13 and three or four) based on these four CVD risk factors. The unit of medical expenditure was set as  
14  
15 Japanese Yen (i.e. 100 Japanese yen (JPY) = 0.81 pounds (GBP), at the exchange rates published on  
16  
17 10 August 2012).

18  
19  
20  
21  
22  
23 A gamma regression model, which is a member of generalized linear models<sup>12</sup>, was used to  
24  
25 estimate the mean medical expenditure of the abovementioned four categories after adjusting for  
26  
27 confounding factors. As medical expenditure data usually involve a certain proportion of zeros and  
28  
29 some extreme values, their distribution was skewed to the right<sup>13-15</sup>. A gamma regression is the best  
30  
31 modelling approach to deal with this skewness.  
32  
33  
34  
35  
36  
37

38 Statistical models were formulated by sex and age. Specifically, we estimated age-specific  
39  
40 medical expenditure (per year) for the following four ages: 50 years, 60 years, 70 years, and 80 years.  
41  
42 These estimated expenses were then plotted against the number of CVD risk factors. The regional  
43  
44 variation of local municipalities in Shiga prefecture was considered using the generalized estimating  
45  
46 equation (GEE) approach<sup>12</sup>, which accounts for any correlation within each municipality.  
47  
48  
49  
50  
51

52 To describe how the increasing number of CVD risk factors affects total medical  
53  
54 expenditure in Japan, age-adjusted mean medical expenditure and the corresponding number of  
55  
56  
57  
58  
59  
60

1  
2  
3  
4  
5  
6 participants were also graphed, both for the elderly (aged 65 and over) and for the non-elderly (aged  
7  
8  
9 40 to 64) populations. The cost ratios and overspend (excess fraction) were also calculated for each  
10  
11 CVD risk factor group. The cost ratio represents the estimated mean medical expenditure of the  
12  
13 corresponding group divided by the reference (i.e. the no CVD risk factor group), while overspend  
14  
15 was calculated as the proportion of a certain group's excess medical expenditure relative to the  
16  
17 whole population. This overspend can be interpreted as the medical expenditure that would not have  
18  
19 occurred if the participants had possessed no CVD risk factors. All statistical analysis was performed  
20  
21 using SAS release 9.20 (SAS Institute Inc., Cary, NC, USA).  
22  
23  
24  
25  
26  
27  
28  
29  
30  
31

## 32 **Results**

33  
34  
35 Table 1 compares the baseline characteristics of the four CVD risk factor groups. As the  
36  
37 number of CVD risk factors increases, the means of systolic blood pressure, total cholesterol, and  
38  
39 blood glucose and the proportion of current smokers grow in both men and women. The most  
40  
41 prevalent CVD risk factors in the study participants are, first, hypertension in both men and women  
42  
43 followed by smoking in men and cholesterol in women.  
44  
45  
46  
47  
48

49  
50 Figure 1 shows the age-specific estimated mean medical expenditure (per year) for each  
51  
52 CVD risk factor group by sex and age. Most age group graphs indicate a gradual increase in medical  
53  
54 expenditure as the number of CVD risk factors rises for both men and women. This figure shows  
55  
56  
57  
58  
59  
60



1  
2  
3  
4  
5  
6 that the mean medical expenditure (per year) for the no CVD risk factor group is just 110,000 Yen at  
7  
8  
9 age 50 (men: 110,708 Yen, women: 107,109 Yen), but that this expenditure is six to seven times  
10  
11  
12 higher for 80-year-olds who have three or four CVD risk factors (men: 603,351 Yen, women:  
13  
14  
15 765,673 Yen).

16  
17  
18 Figure 2 shows the distribution of the number of CVD risk factors and their corresponding  
19  
20 mean medical expenditure (per year) for the four subgroups (i.e. non-elderly men, elderly men,  
21  
22 non-elderly women, elderly women) adjusted by age. The corresponding cost ratios and overspends  
23  
24 (excess fractions) in each group are also shown by sex and age. The adjusted mean medical  
25  
26 expenditure increases as the number of CVD risk factors rises, meaning that the cost ratio for the  
27  
28 group with three or four CVD risk factors increases by more than 40% relative to the reference  
29  
30 group. These trends were most obvious in non-elderly men (cost ratio: 1.86). The total overspend  
31  
32 was larger in the non-elderly population (men: 15.4%, women: 11.1%) than it was in the elderly  
33  
34 (men: 0.1%, women: 5.2%). The total overspend was mostly driven by the groups with one  
35  
36 (non-elderly men: 6.8%, non-elderly women: 7.4%, elderly women: 3.7%) or two risk factors  
37  
38 (non-elderly men: 6.8%, non-elderly women: 3.5%, elderly women: 1.3%) compared with three or  
39  
40 four risk factors (non-elderly men: 1.8%, non-elderly women: 0.2%, elderly women: 0.2%), with the  
41  
42 exception of elderly men.  
43  
44  
45  
46  
47  
48  
49  
50  
51  
52  
53  
54  
55  
56  
57  
58  
59  
60

## Discussion

We performed a community-based cost analysis to investigate the sex- and age-specific effects of CVD risk factor clustering on total medical expenditure in Japan. We measured the relative increases (cost ratios) and population impacts (overspends) and found that annual medical expenditure increases as the number of CVD risk factors rises in all age and sex groups. While the relative increase in the group with three or four CVD risk factors was greatest, the population impacts on total medical expenditure were larger among the group with one or two CVD risk factors.

The findings from the Framingham study have already shown that Medicare costs increase with combinations of risk factors, such as hypertension, smoking, and hypercholesterolemia.<sup>8</sup> Studies from the United States<sup>9</sup> and Japan<sup>10,11</sup> have also shown similar increasing patterns in the community setting. Our study showed that the cost ratios in the three or four CVD risk factor group were between 1.44 and 1.74, which are similar to the values found in the Framingham study<sup>8</sup> and another study in Japan<sup>10</sup>. However, other studies have found relatively larger ratios, such as 1.84–2.45 in the United States<sup>9</sup> and 1.91 in Japan<sup>11</sup>, since medical expenditure is largely affected by the insurance system, study participants, and the region. The different characteristics of these previous studies, such as the definition of risk factors, length of study periods, and estimation procedures (statistical models), also affect their results.

The strength of our study is that the statistical modelling technique applied was suitable for

1  
2  
3  
4  
5  
6 analysing skewed medical expenditure data in contrast to a previous paper. The guideline from the  
7  
8  
9 International Society of Pharmacoeconomics and Outcome Research (ISPOR) recommended using  
10  
11 this statistical model in the cost data analysis<sup>13</sup>. The cost data often show a skewed distribution,  
12  
13 which violated the equidispersion property of mean and variance. In a case with a certain proportion  
14  
15 of zeros, a Gamma regression is most suitable statistical model, which assumed the extra-variation  
16  
17 (overdispersion) of the outcome. We applied a Gamma regression model<sup>12-15</sup> for the cost analysis<sup>16</sup>  
18  
19 in order to investigate in-depth sex- and age-specific attributes, which is difficult in a stratified  
20  
21 analysis. Our focus on the elderly is especially important in developed countries, where the ageing  
22  
23 population is increasing the proportion of the elderly, which is considered to be a vulnerable and  
24  
25 sometimes frail group.  
26  
27  
28  
29  
30  
31  
32  
33  
34

35 It is important to note that individual medical expenses were highest in the three or four  
36  
37 CVD risk factor group for all subgroups. This population would thus be the main target for high-risk  
38  
39 approaches to contain medical expenditure growth. High-risk strategies, such as comprehensive  
40  
41 health guidance by public health nurses, dieticians, or physicians, can be readily understood and they  
42  
43 can strongly motivate people to change their lifestyles to manage CVD risk factors.  
44  
45  
46  
47  
48

49 However, from the viewpoint of total medical expenditure, people with one or two CVD  
50  
51 risk factors are not negligible. This population had a greater influence on total medical expenditure  
52  
53 than did the high-CVD risk factor group, especially in the non-elderly, which accounted for more  
54  
55  
56  
57  
58  
59  
60

1  
2  
3  
4  
5  
6 thqn 10% of total medical expenditure when the one and two CVD risk factor groups were combined  
7  
8  
9 compared with 5.0% for elderly women and 0.0% for elderly men. However, it is difficult to  
10  
11  
12 implement effective high-risk strategies because of the large population of people with one or two  
13  
14  
15 CVD risk factors. For this group, a population strategy may be useful for gradually lowering the  
16  
17  
18 distribution of CVD risk factors<sup>17</sup>.  
19

20  
21 The present study has several limitations. First, details of medical diagnoses, medical  
22  
23  
24 treatment status (e.g. prescriptions), clinical condition such as CVD history, and cause of mortality  
25  
26  
27 were unavailable in this study. It is true that the medical treatment status and the clinical conditions  
28  
29  
30 are key elements of increasing medical expenditure. Our reference group contained both the  
31  
32  
33 non-prescribed (healthy population) and the prescribed. This might overestimate the “referent” mean  
34  
35  
36 medical expenditure. From this viewpoint, the relative measures (cost ratios) of CVD risk factors  
37  
38  
39 might be underestimated in this study. Second, medical expenditure was evaluated over a relatively  
40  
41  
42 short time period (six years) despite investigating long-term effects. As severe health events such as  
43  
44  
45 stroke and myocardial infarction can occur after a long interval in high-risk individuals, excess  
46  
47  
48 medical expenditure might be underestimated. Third, data on fasting blood glucose, triglycerides,  
49  
50  
51 and HDL-cholesterol were unavailable. Finally, because the public medical insurance system in  
52  
53  
54 Japan is different from those in other developed countries, we should be cautious when comparing  
55  
56  
57 the absolute values of medical expenses for participants in the present study.  
58  
59  
60

1  
2  
3  
4  
5  
6 In conclusion, this investigation into the sex- and age-specific effects of CVD risk factors  
7  
8  
9 on medical expenditure in Japan showed a large relative increase in people with three or four CVD  
10  
11 risk factors. However, the population impacts on total medical expenditure were larger among  
12  
13 people with one or two CVD risk factors, especially in non-elderly women. A high-risk approach for  
14  
15 people with three or four CVD risk factors and a population approach for the majority are thus both  
16  
17 necessary to reduce total medical expenditure in Japan.  
18  
19  
20  
21  
22  
23  
24  
25

### 26 **Contributors**

27  
28  
29 YM was involved in database management, data analysis, data interpretation and wrote the  
30  
31 manuscript. TO designed the study and was involved in database management, data interpretation  
32  
33 and wrote the manuscript. KN was involved in data interpretation and writing the manuscript. KM  
34  
35 was involved in data interpretation and writing the manuscript. UH was involved in data  
36  
37 interpretation and writing the manuscript.  
38  
39  
40  
41  
42

### 43 **Funding**

44  
45  
46 This research was supported by a Grant-in-Aid for Scientific Research (C) from the Japan Society  
47  
48 for the Promotion of Science (22590585) and Grants-in-Aid from the Ministry of Health, Labor and  
49  
50 Welfare, Health and Labor Sciences Research Grants, Japan (Research on Health Services:  
51  
52 H17-Kenkou-007; Comprehensive Research on Cardiovascular and Life-Style Related Diseases:  
53  
54  
55  
56  
57  
58  
59  
60

1  
2  
3  
4  
5  
6 H18-Junkankitou [Seishuu]-Ippan-012; Comprehensive Research on Cardiovascular and Life-Style

7  
8  
9 Related Diseases: H20-Junkankitou [Seishuu]-Ippan-013; Comprehensive Research on Life-Style

10  
11  
12 Related Diseases including Cardiovascular Diseases and Diabetes Mellitus: H20-Junkankitou

13  
14 [Seishuu]-Ippan-013 and Comprehensive Research on Life-Style Related Diseases including

15  
16  
17 Cardiovascular Diseases and Diabetes Mellitus: H23-Junkankitou [Seishuu]-Ippan-005).

18  
19  
20 **Competing interests**

21  
22  
23 None

24  
25  
26 **Ethics approval**

27  
28  
29 Medical research ethics committee approval was granted by the Shiga University of Health Science

30  
31  
32 Research Ethics Committee (17-20-1).

33  
34  
35 **Provenance and peer review**

36  
37  
38 Not commissioned; externally peer reviewed.

39  
40  
41 **Data sharing statement**

42  
43  
44 No additional data are available.

45  
46  
47  
48  
49 **References**

- 50  
51  
52 1. Ezzati M, Hoorn SV, Rodgers A, et al. Estimates of global and regional potential health gains  
53  
54  
55 from reducing multiple major risk factors. *Lancet* 2003;362:271–80.  
56  
57

- 1  
2  
3  
4  
5  
6 2. Greenland P, Knoll MD, Stamler J, et al. Major risk factors as antecedents of fatal and nonfatal  
7  
8 coronary heart disease events. *JAMA* 2003;290:891–7.
- 9  
10  
11 3. Kadota A, Hozawa A, Okamura T, et al. Relationship between metabolic risk factor clustering  
12  
13 and cardiovascular mortality stratified by high blood glucose and obesity: NIPPON DATA90,  
14  
15 1990–2000. *Diabetes Care* 2007;30:1533–8.
- 16  
17  
18  
19  
20 4. McNeill AM, Rosamond WD, Girman CJ, et al. The metabolic syndrome and 11-year risk of  
21  
22 incident cardiovascular disease in the atherosclerosis risk in communities study. *Diabetes Care*  
23  
24 2005;28:385–90.
- 25  
26  
27  
28  
29 5. Nakamura K, Okamura T, Kanda H, et al. Medical costs of patients with hypertension and/or  
30  
31 diabetes: A 10-year follow-up study of National Health Insurance in Shiga, Japan. *J Hypertens*  
32  
33 2006;24:2305–9.
- 34  
35  
36  
37  
38 6. Izumi Y, Tsuji I, Ohkubo T, et al. *Int J Epidemiol*. 2001;30:616–21
- 39  
40  
41 7. Daviglius ML, Liu K, Yan LL, et al. Relation of body mass index in young adulthood and middle  
42  
43 age to Medicare expenditures in older age. *JAMA*. 2004;292:2743–9.
- 44  
45  
46  
47 8. Schauffler HH, D’Agostino RB, Kannel WB. Risk for cardiovascular disease in the elderly and  
48  
49 associated Medicare costs: The Framingham Study. *Am J Prev Med* 1993;9:146–54.
- 50  
51  
52  
53 9. Daviglius ML, Liu K, Greenland P, et al. Benefit of a favorable cardiovascular risk-factor profile  
54  
55 in middle age with respect to Medicare costs. *N Engl J Med* 1998;339:1122–9.
- 56  
57  
58  
59  
60

- 1  
2  
3  
4  
5  
6 10. Okamura T, Nakamura K, Kanda H, et al. Effect of combined cardiovascular risk factors on  
7  
8 individual and population medical expenditures – A 10-year cohort study of national health  
9  
10 insurance in a Japanese population. *Circ J* 2007;71:807–13  
11  
12  
13  
14 11. Ohmori-Matsuda K, Kuriyama S, Hozawa A, et al. The joint impact of cardiovascular risk  
15  
16 factors upon medical costs. *Prev Med*. 2007;44:349–55.  
17  
18  
19  
20 12. Fitzmaurice GM, Laird NM, Ware JH. Applied Longitudinal Analysis Second Edition. New  
21  
22 Jersey: John Wiley & Sons, 2011.  
23  
24  
25  
26 13. Ramsey S, Willke R, Briggs A et al. Good research practices for cost-effectiveness analysis  
27  
28 alongside clinical trials: the ISPOR RCT-CEA Task Force report. *Value Health*. 2005;8:521–33.  
29  
30  
31  
32 14. Basu A, Manning WG. Issues for the next generation of health care cost analyses. *Med Care*.  
33  
34 2009;7 (Suppl 1):S109–14.  
35  
36  
37  
38 15. Manning WG, Basu A, Mullahy J. Generalized modeling approaches to risk adjustment of  
39  
40 skewed outcomes data. *J Health Econ*. 2005;24:465–88.  
41  
42  
43  
44 16. Glick HA, Doshi JA, Sonnad SS, et al. Economic Evaluation in Clinical Trials. New York:  
45  
46 Oxford University Press, 2007.  
47  
48  
49 17 · Rose G. Sick individuals and sick populations. *Int J Epidemiol* 1985;14:32–8.  
50  
51  
52  
53  
54  
55  
56  
57  
58  
59  
60



Table 1. The baseline characteristics of study participants, Shiga prefectural follow-up study of medical expenditure, 2000–2006

|                         | Number of cardiovascular risk factors* |    |     |                      |    |     |                     |    |     |                   |    |     |
|-------------------------|----------------------------------------|----|-----|----------------------|----|-----|---------------------|----|-----|-------------------|----|-----|
|                         | 0                                      |    |     | 1                    |    |     | 2                   |    |     | 3 or 4            |    |     |
|                         | Men:4187; women:9924                   |    |     | Men:5947, women:8953 |    |     | Men1945, women:1964 |    |     | Men:206, women:87 |    |     |
|                         | Mean                                   | SD | %** | Mean                 | SD | %** | Mean                | SD | %** | Mean              | SD | %** |
| Men                     |                                        |    |     |                      |    |     |                     |    |     |                   |    |     |
| Age                     | 70                                     | 10 | -   | 68                   | 11 | -   | 67                  | 10 | -   | 65                | 10 | -   |
| Systolic blood pressure | 124                                    | 11 | 0   | 138                  | 19 | 55  | 148                 | 17 | 87  | 151               | 15 | 96  |
| Total cholesterol       | 188                                    | 27 | 0   | 191                  | 31 | 5   | 202                 | 41 | 23  | 234               | 39 | 68  |
| Blood glucose           | 103                                    | 23 | 0   | 106                  | 29 | 1   | 118                 | 50 | 8   | 178               | 94 | 45  |
| Current smokers         | -                                      | -  | 0   | -                    | -  | 38  | -                   | -  | 82  | -                 | -  | 94  |
| Women                   |                                        |    |     |                      |    |     |                     |    |     |                   |    |     |
| Age                     | 66                                     | 11 | -   | 69                   | 10 | -   | 68                  | 9  | -   | 66                | 9  | -   |
| Systolic blood pressure | 122                                    | 12 | 0   | 143                  | 18 | 70  | 150                 | 15 | 93  | 156               | 15 | 100 |
| Total cholesterol       | 200                                    | 24 | 0   | 214                  | 34 | 23  | 249                 | 32 | 82  | 261               | 23 | 94  |
| Blood glucose           | 98                                     | 19 | 0   | 102                  | 27 | 1   | 112                 | 46 | 7   | 168               | 92 | 39  |
| Current smokers         | -                                      | -  | 0   | -                    | -  | 6   | -                   | -  | 18  | -                 | -  | 70  |

\* The four CVD risk factors analysed in this study were defined as follows: hypertension (systolic blood pressure $\geq$ 140 mmHg or diastolic blood pressure $\geq$ 90 mmHg), hypercholesterolemia (total cholesterol $\geq$ 240 mg/dl), high blood glucose (casual blood glucose $\geq$ 200 mg/dl), and smoking (current smoker).

\*\* For each CVD risk factor, the proportions (%) of participants who possess this risk factor are shown in each category.

**Figure legends**

Figure 1. The age- and sex-specific estimated mean medical expenditure (per year) by CVD risk factor group.

The Gamma regression was used to estimate the mean medical expenditure in the model. The black rectangles show the mean medical expenditure (per year) of each CVD risk factor group and the corresponding solid lines show their 95% confidence intervals.

Figure 2. The distribution of the number of CVD risk factors, their estimated mean medical expenditure (per year), and overspend in the population: (A) men aged 40 to 64, (B) men aged 65 and over, (C) women aged 40 to 64, and (D) women aged 65 and over.

The Gamma regression was used to estimate the mean medical expenditure in the model. The overspend is the difference between the expenditure of each category and the reference (i.e. the no CVD risk factor group). This was defined as the proportion of excess expenditure relative to total medical expenditure.

**Additional file 1**

EVEREST Statement: Checklist for health economics paper

|                                                                                                                                                | <b>Study section</b>     | <b>Additional remarks</b> |
|------------------------------------------------------------------------------------------------------------------------------------------------|--------------------------|---------------------------|
| <b>Study design</b>                                                                                                                            |                          |                           |
| (1) The research question is stated                                                                                                            | Introduction             |                           |
| (2) The economic importance of the research question is stated                                                                                 | Introduction             |                           |
| (3) The viewpoint(s) of the analysis are clearly stated and justified                                                                          | Methods                  |                           |
| (4) The rationale for choosing the alternative programmes or interventions compared is stated                                                  | Introduction and Methods |                           |
| (5) The alternatives being compared are clearly described                                                                                      | Introduction and Methods |                           |
| (6) The form of economic evaluation used is stated                                                                                             | Introduction and Methods |                           |
| (7) The choice of form of economic evaluation is justified in relation to the questions addressed                                              | Introduction and Methods |                           |
|                                                                                                                                                |                          |                           |
| <b>Data collection</b>                                                                                                                         |                          |                           |
| (8) The source(s) of effectiveness estimates used are stated                                                                                   | Methods                  |                           |
| (9) Details of the design and results of effectiveness study are given (if based on single study)                                              | Methods                  |                           |
| (10) Details of the method of synthesis or meta-analysis of estimates are given (if based on an overview of a number of effectiveness studies) | N/A                      |                           |
| (11) The primary outcome measure(s) for the economic evaluation are clearly stated                                                             | Methods                  |                           |
| (12) Methods to value health states and other benefits are stated                                                                              | N/A                      |                           |
| (13) Details of the subjects from whom valuations were obtained are given                                                                      | N/A                      |                           |
| (14) Productivity changes (if included) are reported separately                                                                                | N/A                      |                           |
| (15) The relevance of productivity changes to the study question is discussed                                                                  | N/A                      |                           |
| (16) Quantities of resources are reported separately from their unit costs                                                                     | Methods                  |                           |
| (17) Methods for the estimation of quantities and unit costs are described                                                                     | Methods                  |                           |
| (18) Currency and price data are recorded                                                                                                      | Methods                  |                           |
| (19) Details of currency of price adjustments for inflation or currency conversion are given                                                   | N/A                      |                           |

|                                                                                          |                   |  |
|------------------------------------------------------------------------------------------|-------------------|--|
| (20) Details of any model used are given                                                 | Methods           |  |
| (21) The choice of model used and the key parameters on which it is based are justified  | Methods           |  |
|                                                                                          |                   |  |
| <b>Analysis and interpretation of results</b>                                            |                   |  |
| (22) Time horizon of costs and benefits is stated                                        | Methods           |  |
| (23) The discount rate(s) is stated                                                      | N/A               |  |
| (24) The choice of rate(s) is justified                                                  | N/A               |  |
| (25) An explanation is given if costs or benefits are not discounted                     | N/A               |  |
| (26) Details of statistical tests and confidence intervals are given for stochastic data | Methods           |  |
| (27) The approach to sensitivity analysis is given                                       | N/A               |  |
| (28) The choice of variables for sensitivity analysis is justified                       | N/A               |  |
| (29) The ranges over which the variables are varied are stated                           | N/A               |  |
| (30) Relevant alternatives are compared                                                  | Methods           |  |
| (31) Incremental analysis is reported                                                    | N/A               |  |
| (32) Major outcomes are presented in a disaggregated as well as aggregated form          | Table and Figures |  |
| (33) The answer to the study question is given                                           | Discussion        |  |
| (34) Conclusions follow from the data reported                                           | Discussion        |  |
| (35) Conclusions are accompanied by the appropriate caveats                              | Discussion        |  |

1  
2  
3  
4  
5  
6  
7  
8  
9  
10  
11  
12  
13  
14  
15  
16  
17  
18  
19  
20  
21  
22  
23  
24  
25  
26  
27  
28  
29  
30  
31  
32  
33  
34  
35  
36  
37  
38  
39  
40  
41  
42  
43  
44  
45  
46  
47  
48  
49  
50  
51  
52  
53  
54  
55  
56  
57  
58  
59  
60

**The clustering of cardiovascular disease risk factors and their impacts on annual medical expenditure in Japan: community-based cost ~~minimization~~ analysis using Gamma regression models**

Formatted: Font: Bold

Yoshitaka Murakami, Tomonori Okamura, Koshi Nakamura, Katsuyuki Miura, Hirotsugu Ueshima

Yoshitaka Murakami associate professor Department of Medical Statistics, Shiga University of Medical Science, Seta Tsukinowa-cho, Otsu, Shiga 520-2192, Japan Tomonori Okamura professor Department of Preventive Medicine and Public Health, Keio University, Shinano-machi 35, Shinjuku-ku, Tokyo 160-8582, Japan Koshi Nakamura associate professor Department of Epidemiology and Public Health, Kanazawa Medical University, 1-1 Daigaku, Uchinada, Ishikawa 920-0293, Japan Katsuyuki Miura professor Department of Health Science, Shiga University of Medical Science, Otsu, Seta Tsukinowa-cho, Otsu, Shiga 520-2192, Japan Hirotsugu Ueshima professor Lifestyle-related Disease Prevention Centre, Shiga University of Medical Science, Seta Tsukinowa-cho, Otsu, Shiga 520-2192, Otsu, Japan Department of Health Science, Shiga University of Medical Science, Otsu, Japan

Correspondence to: Y Murakami ymura@belle.shiga-med.ac.jp

## Abstract

**Objective** The clustering of cardiovascular disease (CVD) risk factors is a serious threat to a population health. This detrimental effect also for increases medical expenses, especially for the elderly population. The present age-specific investigation into quantitative assessment of the proportion and distribution of medical expenditure attributable to CVD risk factors, especially focused on the elderly, is thus indispensable for formulating public health policy given the extent of the ageing population in developed countries.

**Design** Cost minimization analysis using individuals' medical expenses and their corresponding health examination measures.

**Setting** Shiga prefecture, Japan, from April 2000 to March 2006.

**Participants** 339,213+4 participants aged 40 years and over.

**Main outcome measures** Mean annual medical expenditure per year.

**Methods** Gamma regression models were applied to examine how the number of CVD risk factors affects annual mean medical expenditure. The four CVD risk factors analysed in this study were defined as follows: hypertension (systolic blood pressure  $\geq 140$  mmHg or diastolic blood pressure  $\geq 90$  mmHg), hypercholesterolemia (serum total cholesterol  $\geq 240$  mg/dl), high blood glucose (casual

Formatted: Font:

Formatted: Underline

Formatted: Underline

Formatted: Underline

1  
2  
3  
4  
5  
6  
7  
8  
9 blood glucose  $\geq 200$  mg/dl), and smoking (current smoker). Sex- and age-specific investigations were  
10  
11 carried out on the elderly (aged 65 and over) and non-elderly (aged 40 to 64) populations.

12  
13 **Results** The mean ~~annual~~ medical expenditure (per year) for the no CVD risk factor group was only  
14  
15 1130,000 Yen at age 50 (men: ~~11033,708413~~ Yen, women: ~~10745,109470~~ Yen), but this expenditure  
16  
17 was six to seven times higher for 80-year-olds who have three or four CVD risk factors (men:  
18  
19 ~~974603,351449~~ Yen, women: ~~906,821765,673~~ Yen). The total overspend (excess fraction) was larger  
20  
21 for the non-elderly (men: ~~150.42~~%, women: ~~119.13~~%) than for the elderly (men: ~~-0.17~~%, women:  
22  
23 ~~54.27~~%) and largely driven by people with one or two CVD risk factors, except for elderly men.

24  
25 **Conclusion** ~~A Our~~ The age-specific proportion and distribution of medical expenditure attributable  
26  
27 to CVD risk factors quantitative assessments showed that a high-risk approach for the elderly and a  
28  
29 population approach for the majority are both necessary to reduce total medical expenditure in  
30  
31 Japan.

32  
33 **Keywords:** Cost ~~minimization~~ analysis, Cardiovascular disease risk factor, Medical expenditure,  
34  
35 Japan, Elderly population

#### 36 37 38 39 40 41 42 43 44 45 46 47 **Article Focus**

48  
49 >Cardiovascular disease risk factors are often clustered in an individual, which seriously increases  
50  
51 the likelihood of suffering from cardiovascular disease and this clustering of risk factors also  
52  
53

1  
2  
3  
4  
5  
6  
7  
8  
9 increases medical expenses.

10  
11 > The present study examined ~~how age- and sex-~~specific clustering of cardiovascular risk factors,  
12 and how it affected trends influence total medical expenditure ~~and assessed how the clustering of~~  
13 CVD risk factors affectsin the Japanese population.  
14  
15  
16  
17

### 18 19 **Key Messages**

20  
21 >The total overspend attributable to cardiovascular risk factors ~~-of annual medical expenditure-~~is  
22 larger ~~for among~~ the non-elderly population than for the elderly in Japan.  
23  
24

25  
26 >Larger medical overspends were driven by the groups with one or two risk factors rather than by as  
27 opposed to those with three or four, except for men aged 65 and over, risk factors, ~~except for elderly~~  
28 men.  
29  
30  
31  
32

### 33 34 **Strengths and Limitations of This Study**

35  
36  
37 >The statistical modelling technique which we applied was suitable for analysing skewed medical  
38 expenditure data in contrast to a previous paper.  
39

40  
41  
42 > The use of large comprehensive community-based database of health examination and medical  
43 expenditure brought us the stratified information by sex and age.  
44  
45

46  
47 >Our focus on the elderly, which is considered to be a vulnerable and sometimes frail group, is  
48 especially important in developed countries where the proportion of the elderly is increasing.  
49

50  
51 >The medical expenditure was evaluated over a relatively short time period (six years) despite  
52  
53  
54



1  
2  
3  
4  
5  
6  
7  
8  
9 investigating long-term effects, such as stroke and myocardial infarction.  
10  
11

## 12 13 14 **Introduction**

15  
16 Hypertension, dyslipidemia, diabetes, and smoking are well-established risk factors for  
17  
18 cardiovascular disease (CVD), and the damage caused by these factors is widespread across the  
19  
20 developed world.<sup>1</sup> However, it is also well recognized in the literature that a combination of these  
21  
22 risk factors in an individual increases the risk of CVD.<sup>2</sup> For example, several studies have shown  
23  
24 that the clustering of metabolic risk factors more than doubles the likelihood of CVD mortality.<sup>3,4</sup>  
25  
26 Moreover, from a health economics perspective, these individual CVD risk factors<sup>5-7</sup> and their  
27  
28 combination<sup>8-11</sup> have also been reported to increase total medical expenditure in developed countries.  
29  
30 Indeed, the public health sectors in many western nations are now facing considerable challenges  
31  
32 because of such spiralling medical expenses.  
33  
34  
35  
36  
37  
38

39  
40 From a financial viewpoint, the elderly population (persons aged 65 and over) is the  
41  
42 greatest consumer of medical resources. However, even though it is clear that individual medical  
43  
44 bills differ by age group, few studies have investigated age-specific medical expenses because of  
45  
46 methodological issues, such as insufficient sample sizes and inappropriate statistical models. To help  
47  
48 bridge this gap in the body of knowledge on this topic, a comprehensive community-based database  
49  
50 for medical expenditure, which includes approximately 60,000 individuals, has been developed in  
51  
52  
53  
54

1  
2  
3  
4  
5  
6  
7  
8  
9 Shiga, Japan. This database consists of individuals' health examinations and their medical expenses  
10  
11 over a three- to five-year period. Exploring this database allows us to perform an age-specific cost  
12  
13 ~~minimization~~ analysis using Gamma regression models, especially for the elderly population. The  
14  
15 present study ~~thus examines how~~ ~~conducted~~ ~~examined the~~ age- and sex-specific proportion and  
16  
17 distribution of medical expenditure attributable for the number of CVD risk factors trends  
18  
19 influence quantitative assessments of total medical expenditure and assesses ~~examines~~ ~~how the~~  
20  
21 clustering of CVD risk factors affects ~~in~~ the Japanese population.  
22  
23  
24  
25  
26  
27  
28

## 29 **Methods**

### 30 **The medical expenditure system in Japan**

31  
32  
33  
34 The payment of medical expenses in Japan is based on a public medical insurance  
35  
36 institution that comprises two systems. Since 1961, all Japan residents have been required to enroll  
37  
38 in one of these two insurance systems under the so-called 'health insurance for all' scheme. First, the  
39  
40 National Health Insurance (NHI) scheme covers self-employed workers (e.g. farmers, fishers,  
41  
42 shopkeepers), retirees, and their dependents. The elderly in Japan are thus most often covered by the  
43  
44 NHI scheme. The other insurance system (e.g. Health Insurance Society, Mutual Aid Association)  
45  
46 covers company employees and their dependents. These two systems cover 65.3% and 34.7% of the  
47  
48 Japanese population, respectively. All charges are strictly controlled by a service-specific fee  
49  
50  
51  
52  
53  
54

1  
2  
3  
4  
5  
6  
7  
8  
9 schedule set by the national government that is constant regardless of insurance system or health  
10  
11 institution.

### 12 13 14 **Study population and data**

15  
16 The comprehensive dataset used in this study comprised 64,450 NHI beneficiaries in Shiga  
17  
18 prefecture in central Japan. Data on medical expenses and annual health examinations are both key  
19  
20 components of this database. Medical expenses data were collected from the database of the Shiga  
21  
22 Health Insurance Organization, which is a local branch of the NHI. The original database provides  
23  
24 data from April 2000 to March 2006. For the economic evaluation, we ~~ealeulated~~ used a mean annual  
25  
26 medical expenditure ~~as the sum of monthly(per year), which was calculated by summing all~~ medical  
27  
28 expenditure ~~throughout the observation periods and~~ divided by the total ~~periods of~~  
29  
30 ~~observation.observation periods of months. This monthly-based measure is multiplied twelve to~~  
31  
32 ~~transform a mean medical expenditure (per year).~~ The data of an annual health examination were  
33  
34 provided from every local municipality of Shiga prefecture. In Japan, an annual health examination  
35  
36 was free of charge or inexpensive for all Japanese, which is entitled by the law (Act on Assurance of  
37  
38 Medical Care for Elderly People). Those data were appropriately stored with security protections in  
39  
40 every local municipality. Data on annual health examinations from April 2000, which included the  
41  
42 baseline information for our study, were provided from all 26 local municipalities in Shiga  
43  
44 prefecture. Both medical expenses and health examination measures were merged into the database  
45  
46  
47  
48  
49  
50  
51  
52  
53  
54

1  
2  
3  
4  
5  
6  
7  
8  
9 using individual identification information (i.e. name, sex, and date of birth) for the administrative  
10  
11 use. This merging process was conducted by the Shiga Health Insurance Organization, the public  
12  
13 agency for paying insurance in Shiga. The anonymous dataset were extracted from the database and  
14  
15  
16 then, participants who displayed signs of blood pressure, serum total cholesterol, casual blood  
17  
18 glucose, and smoking habits (see next subsection) were included in the analysis. The participants  
19  
20  
21 who have not censored during whole follow-up period were included in the analysis (n=334,24139).  
22  
23

24 Medical research ethics committee approval was granted by the Shiga University of Health Science  
25  
26 Research Ethics Committee (17-20-1).  
27

### 28 29 **Statistical analysis**

30  
31 Specifically, the four CVD risk factors analysed in this study were defined as follows:  
32  
33 hypertension (systolic blood pressure $\geq$ 140 mmHg or diastolic blood pressure $\geq$ 90 mmHg),  
34  
35 hypercholesterolemia (serum total cholesterol $\geq$ 240 mg/dl), high blood glucose (casual blood  
36  
37 glucose $\geq$ 200 mg/dl), and smoking (current smoker). All participants were classified into four  
38  
39 categories (i.e. none, one, two, and three or four) based on these four CVD risk factors. The unit of  
40  
41 medical expenditure was set as Japanese Yen (i.e. 100 Japanese yen (JPY) = 0.81 pounds (GBP), at  
42  
43 the exchange rates published on 10 August 2012).  
44  
45  
46  
47  
48

49 ~~Because data on individual medical expenses differed by the period of subscription to the NHI,~~  
50  
51  
52 ~~individual medical expenses were divided by these periods of subscription and expressed as the~~  
53  
54

1  
2  
3  
4  
5  
6  
7  
8  
9 ~~mean expenses per year of follow-up. If a beneficiary withdrew from the NHI or died, follow-up was~~  
10  
11 ~~stopped at that point. Follow-up was restarted for beneficiaries who withdrew and then re-enrolled in~~  
12  
13  
14 ~~the NHI.~~

15  
16  
17 A gamma regression model, which is a member of generalized linear models<sup>12</sup>, was used to  
18  
19 estimate the mean ~~annual~~-medical expenditure of the abovementioned four categories after adjusting  
20  
21 for confounding factors. As medical expenditure data usually involve a ~~substantial~~certain proportion  
22  
23 of zeros and some extreme values, their distribution was skewed to the right<sup>13-15</sup>. A gamma  
24  
25 regression is the best modelling approach to deal with this skewness.  
26  
27

28  
29 Statistical models were formulated by sex and age. Specifically, we estimated age-specific  
30  
31 ~~annual~~-medical expenditure (per year) for the following four ages: 50 years, 60 years, 70 years, and  
32  
33 80 years. These estimated expenses were then plotted against the number of CVD risk factors. The  
34  
35 regional variation of local municipalities in Shiga prefecture was considered using the generalized  
36  
37 estimating equation (GEE) approach<sup>12</sup>, which accounts for any correlation within each municipality.  
38  
39

40  
41 To describe how the increasing number of CVD risk factors affects total medical  
42  
43 expenditure in Japan, age-adjusted mean ~~annual~~-medical expenditure and the corresponding number  
44  
45 of participants were also graphed, both for the elderly (aged 65 and over) and for the non-elderly  
46  
47 (aged 40 to 64) populations. The cost ratios and overspend (excess fraction) were also calculated for  
48  
49 each CVD risk factor group. The cost ratio represents the estimated ~~annual~~mean medical expenditure  
50  
51  
52  
53  
54

1  
2  
3  
4  
5  
6  
7  
8  
9 of the corresponding group divided by the reference (i.e. the no CVD risk factor group), while  
10  
11 overspend was calculated as the proportion of a certain group's excess medical expenditure relative  
12  
13 to the whole population. This overspend can be interpreted as the medical expenditure that would not  
14  
15 have occurred if the participants had possessed no CVD risk factors. All statistical analysis was  
16  
17 performed using SAS release 9.20 (SAS Institute Inc., Cary, NC, USA).  
18  
19  
20  
21  
22  
23

## 24 Results

25  
26  
27 Table 1 compares the baseline characteristics of the four CVD risk factor groups. As the  
28  
29 number of CVD risk factors increases, the means of systolic blood pressure, total cholesterol, and  
30  
31 blood glucose and the proportion of current smokers grow in both men and women. The most  
32  
33 prevalent CVD risk factors in the study participants are, first, hypertension in both men and women  
34  
35 followed by smoking in men and cholesterol in women.  
36  
37  
38

39  
40 Figure 1 shows the age-specific estimated ~~annual~~mean medical expenditure ~~(per year)~~ for  
41  
42 each CVD risk factor group by sex and age. Most age group graphs indicate a gradual increase in  
43  
44 medical expenditure as the number of CVD risk factors rises for both men and women. This figure  
45  
46 shows that the mean ~~annual~~medical expenditure ~~(per year)~~ for the no CVD risk factor group is just  
47  
48 1130,000 Yen at age 50 (men: 11033,708443 Yen, women: 107,10915,470 Yen), but that this  
49  
50 expenditure is ~~sex to~~ seven times higher for 80-year-olds who have three or four CVD risk factors  
51  
52  
53  
54

(men: [974603,351,449](#) Yen, women: [906,821,765,673](#) Yen).

Figure 2 shows the distribution of the number of CVD risk factors and their corresponding mean ~~annual~~ medical expenditure ([per year](#)) for the four subgroups (i.e. non-elderly men, elderly men, non-elderly women, elderly women) adjusted by age. The corresponding cost ratios and overspends (excess fractions) in each group are also shown by sex and age. The adjusted ~~annual~~ mean medical expenditure increases as the number of CVD risk factors rises, meaning that the cost ratio for the group with three or four CVD risk factors increases by more than 40% relative to the reference group. These trends were most obvious in ~~non-elderly men~~ elderly women (cost ratio: [1.7486](#)). The total overspend was larger in the non-elderly population (men: [150.42%](#), women: [119.13%](#)) than it was in the elderly (men: [-0.17%](#), women: [54.27%](#)). The total overspend was mostly driven by the groups with one (non-elderly men: [63.86%](#), non-elderly women: [74.49%](#), elderly women: [3.70%](#)) or two risk factors (non-elderly men: [65.84%](#), non-elderly women: [34.51%](#), elderly women: [1.34%](#)) compared with three or four risk factors (non-elderly men: [1.82%](#), non-elderly women: [0.23%](#), elderly women: [0.23%](#)), with the exception of elderly men.

## Discussion

We performed a community-based cost ~~minimization~~ analysis to investigate the sex- and age-specific effects of CVD risk factor clustering on total medical expenditure in Japan. We

1  
2  
3  
4  
5  
6  
7  
8  
9 measured the relative increases (cost ratios) and population impacts (overspends) and found that  
10  
11 annual medical expenditure increases as the number of CVD risk factors rises in all age and sex  
12  
13 groups. While the relative increase in the group with three or four CVD risk factors was greatest, the  
14  
15 population impacts on total medical expenditure were larger among the group with one or two CVD  
16  
17 risk factors.  
18  
19

20  
21 The findings from the Framingham study have already shown that Medicare costs increase  
22  
23 with combinations of risk factors, such as hypertension, smoking, and hypercholesterolemia.<sup>8</sup>  
24  
25 Studies from the United States<sup>9</sup> and Japan<sup>10,11</sup> have also shown similar increasing patterns in the  
26  
27 community setting. Our study showed that the cost ratios in the three or four CVD risk factor group  
28  
29 were between 1.44 and 1.74, which are similar to the values found in the Framingham study<sup>8</sup> and  
30  
31 another study in Japan<sup>10</sup>. However, other studies have found relatively larger ratios, such as 1.84–  
32  
33 2.45 in the United States<sup>9</sup> and 1.91 in Japan<sup>11</sup>, since medical expenditure is largely affected by the  
34  
35 insurance system, study participants, and the region. The different characteristics of these previous  
36  
37 studies, such as the definition of risk factors, length of study periods, and estimation procedures  
38  
39 (statistical models), also affect their results.  
40  
41  
42  
43  
44  
45

46  
47 The strength of our study is that the statistical modelling technique applied was suitable for  
48  
49 analysing skewed medical expenditure data in contrast to a previous paper. [The guideline from the](#)  
50  
51 [International Society of Pharmacoeconomics and Outcome Research \(ISPOR\) recommended using](#)  
52  
53  
54



1  
2  
3  
4  
5  
6  
7  
8  
9 this statistical model in the cost data analysis<sup>13)</sup>. The cost data often show a skewed distribution,  
10  
11 which violated the equidispersion property of mean and variance. In a case with a certain proportion  
12  
13 of zeros, a Gamma regression is most suitable statistical model, which assumed the extra-variation  
14  
15 (overdispersion) of the outcome. We applied a Gamma regression model<sup>12-15</sup> for the cost  
16  
17 minimization-analysis<sup>16</sup> in order to investigate in-depth sex- and age-specific attributes, which is  
18  
19 difficult in a stratified analysis. Our focus on the elderly is especially important in developed  
20  
21 countries, where the ageing population is increasing the proportion of the elderly, which is  
22  
23 considered to be a vulnerable and sometimes frail group.  
24  
25  
26  
27  
28

29  
30 It is important to note that individual medical expenses were highest in the three or four  
31  
32 CVD risk factor group for all subgroups. This population would thus be the main target for high-risk  
33  
34 approaches to contain medical expenditure growth. High-risk strategies, such as comprehensive  
35  
36 health guidance by public health nurses, dieticians, or physicians, can be readily understood and they  
37  
38 can strongly motivate people to change their lifestyles to manage CVD risk factors.  
39  
40  
41

42  
43 However, from the viewpoint of total medical expenditure, people with one or two CVD  
44  
45 risk factors are not negligible. This population had a greater influence on total medical expenditure  
46  
47 than did the high-CVD risk factor group, especially in the non-elderly, which accounted for more  
48  
49 than 109% of total medical expenditure when the one and two CVD risk factor groups were  
50  
51 combined compared with 54.04% for elderly women and -0.07% for elderly men. However, it is  
52  
53  
54  
55

1  
2  
3  
4  
5  
6  
7  
8  
9 difficult to implement effective high-risk strategies because of the large population of people with  
10  
11 one or two CVD risk factors. For this group, a population strategy may be useful for gradually  
12  
13 lowering the distribution of CVD risk factors<sup>17</sup>.

14  
15  
16 The present study has several limitations. ~~First, because the public medical insurance~~  
17  
18 ~~system in Japan is different from those in other developed countries, we should be cautious when~~  
19  
20 ~~comparing the absolute values of medical expenses for participants in the present study.~~ First, details  
21  
22 of medical diagnoses, medical treatment status (e.g. prescriptions), clinical condition such as CVD  
23  
24 history, and cause of mortality were unavailable in this study. It is true that the medical treatment  
25  
26 status and the clinical conditions are key elements of increasing medical expenditure. Our reference  
27  
28 group contained both the non-prescribed (healthy population) and the prescribed. This might  
29  
30 overestimate the “referent” mean medical expenditure. From this viewpoint, the relative measures  
31  
32 (cost ratios) of CVD risk factors might be underestimated in this study. Second, medical expenditure  
33  
34  
35  
36  
37  
38  
39 was evaluated over a relatively short time period (six years) despite investigating long-term effects.

40  
41  
42 As severe health events such as stroke and myocardial infarction can occur after a long interval in  
43  
44 high-risk individuals, excess medical expenditure might be underestimated. Third, data on fasting  
45  
46 blood glucose, triglycerides, and HDL-cholesterol were unavailable. ~~Finally, details of medical~~  
47  
48 ~~diagnoses, medical treatment status (e.g. prescriptions), clinical condition such as CVD history, and~~  
49  
50 ~~cause of mortality were unavailable. Thus, further studies are required to clarify the effects of these~~  
51  
52  
53  
54

1  
2  
3  
4  
5  
6  
7  
8  
9 variables. Finally, because the public medical insurance system in Japan is different from those in  
10 other developed countries, we should be cautious when comparing the absolute values of medical  
11 expenses for participants in the present study.  
12  
13  
14  
15

16  
17 In conclusion, this investigation into the sex- and age-specific effects of CVD risk factors  
18 on medical expenditure in Japan showed a large relative increase in people with three or four CVD  
19 risk factors. However, the population impacts on total medical expenditure were larger among  
20 people with one or two CVD risk factors, especially in non-elderly women. A high-risk approach for  
21 people with three or four CVD risk factors and a population approach for the majority are thus both  
22 necessary to reduce total medical expenditure in Japan.  
23  
24  
25  
26  
27  
28  
29  
30  
31  
32

### 33 34 **Contributors**

35  
36  
37 YM was involved in database management, data analysis, data interpretation and wrote the  
38 manuscript. TO designed the study and was involved in database management, data interpretation  
39 and wrote the manuscript. KN was involved in data interpretation and writing the manuscript. KM  
40 was involved in data interpretation and writing the manuscript. UH was involved in data  
41 interpretation and writing the manuscript.  
42  
43  
44  
45  
46  
47  
48

### 49 **Funding**

50  
51  
52 This research was supported by a Grant-in-Aid for Scientific Research (C) from the Japan Society  
53  
54

1  
2  
3  
4  
5  
6  
7  
8  
9 for the Promotion of Science (22590585) and Grants-in-Aid from the Ministry of Health, Labor and  
10  
11 Welfare, Health and Labor Sciences Research Grants, Japan (Research on Health Services:  
12  
13 H17-Kenkou-007; Comprehensive Research on Cardiovascular and Life-Style Related Diseases:  
14  
15 H18-Junkankitou [Seishuu]-Ippan-012; Comprehensive Research on Cardiovascular and Life-Style  
16  
17 Related Diseases: H20-Junkankitou [Seishuu]-Ippan-013; Comprehensive Research on Life-Style  
18  
19 Related Diseases including Cardiovascular Diseases and Diabetes Mellitus: H20-Junkankitou  
20  
21 [Seishuu]-Ippan-013 and Comprehensive Research on Life-Style Related Diseases including  
22  
23 Cardiovascular Diseases and Diabetes Mellitus: H23-Junkankitou [Seishuu]-Ippan-005).

#### 24 25 26 27 28 29 **Competing interests**

30  
31  
32 None

#### 33 34 35 **Ethics approval**

36  
37 Medical research ethics committee approval was granted by the Shiga University of Health Science  
38  
39 Research Ethics Committee (17-20-1).

#### 40 41 42 **Provenance and peer review**

43  
44 Not commissioned; externally peer reviewed.

#### 45 46 47 **Data sharing statement**

48  
49 No additional data are available.

## References

1. Ezzati M, Hoon SV, Rodgers A, Lopez AD, Mathers CD, Murray CJ; Comparative Risk Assessment Collaborating Group. Estimates of global and regional potential health gains from reducing multiple major risk factors. *Lancet* 2003;362:271–80.
2. Greenland P, Knoll MD, Stamler J, Neaton JD, Dyer AR, Garside DB, Wilson PW. Major risk factors as antecedents of fatal and nonfatal coronary heart disease events. *JAMA* 2003;290:891–7.
3. Kadota A, Hozawa A, Okamura T, Kadowak T, Nakamura K, Murakami Y, Hayakawa T, Kita Y, Okayama A, Nakamura Y, Kashiwagi A, Ueshima H; NIPPON DATA Research Group. Relationship between metabolic risk factor clustering and cardiovascular mortality stratified by high blood glucose and obesity: NIPPON DATA90, 1990–2000. *Diabetes Care* 2007;30:1533–8.
4. McNeill AM, Rosamond WD, Girman CJ, Golden SH, Schmidt MI, East HE, Ballantyne CM, Heiss G. The metabolic syndrome and 11-year risk of incident cardiovascular disease in the atherosclerosis risk in communities study. *Diabetes Care* 2005;28:385–90.
5. Nakamura K, Okamura T, Kanda H, Hayakawa T, Okayama A, Ueshima H; Health Promotion Research Committee of the Shiga National Health Insurance Organizations. Medical costs of patients with hypertension and/or diabetes: A 10-year follow-up study of National Health Insurance in Shiga, Japan. *J Hypertens* 2006;24:2305–9.

- 1  
2  
3  
4  
5  
6  
7  
8  
9 6. Izumi Y, Tsuji I, Ohkubo T, Kuwahara A, Nishino Y, Hisamichi S Impact of smoking habit on  
10  
11 medical care use and its costs: a prospective observation of National Health Insurance  
12  
13 beneficiaries in Japan. *Int J Epidemiol*. 2001;30:616–21  
14  
15
- 16 7. Daviglus ML, Liu K, Yan LL, et al. Relation of body mass index in young adulthood and middle  
17  
18 age to Medicare expenditures in older age. *JAMA*. 2004;292:2743–9.  
19  
20
- 21 8. Schauffler HH, D'Agostino RB, Kannel WB. Risk for cardiovascular disease in the elderly and  
22  
23 associated Medicare costs: The Framingham Study. *Am J Prev Med* 1993;9:146–54.  
24  
25
- 26 9. Daviglus ML, Liu K, Greenland P, Dyer AR, Garside DB, Manheim L, et al. Benefit of a  
27  
28 favorable cardiovascular risk-factor profile in middle age with respect to Medicare costs. *N Engl*  
29  
30 *J Med* 1998;339:1122–9.  
31  
32
- 33 10. Okamura T, Nakamura K, Kanda H, et al. Effect of combined cardiovascular risk factors on  
34  
35 individual and population medical expenditures – A 10-year cohort study of national health  
36  
37 insurance in a Japanese population. *Circ J* 2007;71:807–13  
38  
39
- 40 11. Ohmori-Matsuda K, Kuriyama S, Hozawa A, Nakaya N, Shimazu T, Tsuji I. The joint impact of  
41  
42 cardiovascular risk factors upon medical costs. *Prev Med*. 2007;44:349–55.  
43  
44
- 45 12. Fitzmaurice GM, Laird NM, Ware JH. Applied Longitudinal Analysis Second Edition. New  
46  
47 Jersey: John Wiley & Sons, 2011.  
48  
49
- 50 13. Ramsey S, Willke R, Briggs A et al. Good research practices for cost-effectiveness analysis  
51  
52  
53  
54

1  
2  
3  
4  
5  
6  
7  
8  
9 alongside clinical trials: the ISPOR RCT-CEA Task Force report. *Value Health*. 2005;8:521–33.

10  
11 14. Basu A, Manning WG. Issues for the next generation of health care cost analyses. *Med Care*.

12  
13  
14 2009;7 (Suppl 1):S109–14.

15  
16  
17 15. Manning WG, Basu A, Mullahy J. Generalized modeling approaches to risk adjustment of

18  
19 skewed outcomes data. *J Health Econ*. 2005;24:465–88.

20  
21  
22 16. Glick HA, Doshi JA, Sonnad SS, Polsky D. *Economic Evaluation in Clinical Trials*. New York:

23  
24 Oxford University Press, 2007.

25  
26 17 · Rose G. Sick individuals and sick populations. *Int J Epidemiol* 1985;14:32–8.

Table 1. The baseline characteristics of study participants, Shiga prefectural follow-up study of medical expenditure, 2000–2006

|                         | Number of cardiovascular risk factors* |                        |                      |                    |      |    |     |      |    |        |      |     |
|-------------------------|----------------------------------------|------------------------|----------------------|--------------------|------|----|-----|------|----|--------|------|-----|
|                         | 0                                      |                        |                      | 1                  |      |    | 2   |      |    | 3 or 4 |      |     |
|                         | Men:4890; women:11,737                 | Men:6892, women:10,520 | Men:2337, women:2362 | Men:262, women:114 | Mean | SD | %** | Mean | SD | %**    | Mean | SD  |
| <b>Men</b>              |                                        |                        |                      |                    |      |    |     |      |    |        |      |     |
| Age                     | 70                                     | 11                     | -                    | 68                 | 11   | -  | 67  | 10   | -  | 65     | 10   | -   |
| Systolic blood pressure | 123                                    | 11                     | 0                    | 138                | 19   | 54 | 148 | 17   | 87 | 151    | 14   | 96  |
| Total cholesterol       | 187                                    | 28                     | 0                    | 191                | 31   | 5  | 201 | 41   | 23 | 231    | 41   | 65  |
| Blood glucose           | 104                                    | 24                     | 0                    | 107                | 30   | 1  | 118 | 51   | 8  | 187    | 95   | 49  |
| Current smokers         | -                                      | -                      | 0                    | -                  | -    | 39 | -   | -    | 82 | -      | -    | 94  |
| <b>Women</b>            |                                        |                        |                      |                    |      |    |     |      |    |        |      |     |
| Age                     | 66                                     | 11                     | -                    | 69                 | 10   | -  | 68  | 10   | -  | 66     | 10   | -   |
| Systolic blood pressure | 122                                    | 12                     | 0                    | 143                | 18   | 70 | 150 | 16   | 92 | 155    | 15   | 100 |
| Total cholesterol       | 199                                    | 25                     | 0                    | 214                | 34   | 23 | 248 | 33   | 80 | 260    | 28   | 91  |
| Blood glucose           | 98                                     | 19                     | 0                    | 102                | 27   | 1  | 114 | 50   | 8  | 174    | 93   | 44  |
| Current smokers         | -                                      | -                      | 0                    | -                  | -    | 7  | -   | -    | 20 | -      | -    | 68  |

  

|                         | Number of cardiovascular risk factors* |                      |                      |                   |      |    |     |      |    |        |      |     |
|-------------------------|----------------------------------------|----------------------|----------------------|-------------------|------|----|-----|------|----|--------|------|-----|
|                         | 0                                      |                      |                      | 1                 |      |    | 2   |      |    | 3 or 4 |      |     |
|                         | Men:4187; women:9924                   | Men:5947, women:8953 | Men:1945, women:1964 | Men:206, women:87 | Mean | SD | %** | Mean | SD | %**    | Mean | SD  |
| <b>Men</b>              |                                        |                      |                      |                   |      |    |     |      |    |        |      |     |
| Age                     | 70                                     | 10                   | -                    | 68                | 11   | -  | 67  | 10   | -  | 65     | 10   | -   |
| Systolic blood pressure | 124                                    | 11                   | 0                    | 138               | 19   | 55 | 148 | 17   | 87 | 151    | 15   | 96  |
| Total cholesterol       | 188                                    | 27                   | 0                    | 191               | 31   | 5  | 202 | 41   | 23 | 234    | 39   | 68  |
| Blood glucose           | 103                                    | 23                   | 0                    | 106               | 29   | 1  | 118 | 50   | 8  | 178    | 94   | 45  |
| Current smokers         | -                                      | -                    | 0                    | -                 | -    | 38 | -   | -    | 82 | -      | -    | 94  |
| <b>Women</b>            |                                        |                      |                      |                   |      |    |     |      |    |        |      |     |
| Age                     | 66                                     | 11                   | -                    | 69                | 10   | -  | 68  | 9    | -  | 66     | 9    | -   |
| Systolic blood pressure | 122                                    | 12                   | 0                    | 143               | 18   | 70 | 150 | 15   | 93 | 156    | 15   | 100 |
| Total cholesterol       | 200                                    | 24                   | 0                    | 214               | 34   | 23 | 249 | 32   | 82 | 261    | 23   | 94  |
| Blood glucose           | 98                                     | 19                   | 0                    | 102               | 27   | 1  | 112 | 46   | 7  | 168    | 92   | 39  |
| Current smokers         | -                                      | -                    | 0                    | -                 | -    | 6  | -   | -    | 18 | -      | -    | 70  |

\* The four CVD risk factors analysed in this study were defined as follows: hypertension (systolic blood pressure  $\geq 140$  mmHg or diastolic blood pressure  $\geq 90$  mmHg), hypercholesterolemia (total cholesterol  $\geq 240$  mg/dl), high blood glucose (casual blood glucose  $\geq 200$  mg/dl), and smoking (current smoker).

\*\* For each CVD risk factor, the proportions (%) of participants who possess this risk factor are shown in each category.



1  
2  
3  
4  
5  
6  
7  
8  
9  
10  
11  
12  
13  
14  
15  
16  
17  
18  
19  
20  
21  
22  
23  
24  
25  
26  
27  
28  
29  
30  
31  
32  
33  
34  
35  
36  
37  
38  
39  
40  
41  
42  
43  
44  
45  
46  
47  
48  
49  
50  
51  
52  
53  
54  
55  
56  
57  
58  
59  
60

For peer review only



### Figure legends

Figure 1. The age- and sex-specific estimated annual mean medical expenditure (per year) by CVD risk factor group.

The Gamma regression was used to estimate the mean medical expenditure in the model. The black rectangles show the annual mean medical expenditure (per year) of each CVD risk factor group and the corresponding solid lines show their 95% confidence intervals.

Figure 2. The distribution of the number of CVD risk factors, their estimated mean annual-medical expenditure, (per year), and overspend in the population: (A) men aged 40 to 64, (B) men aged 65 and over, (C) women aged 40 to 64, and (D) women aged 65 and over.

The Gamma regression was used to estimate the mean medical expenditure in the model. The overspend is the difference between the expenditure of each category and the reference (i.e. the no CVD risk factor group). This was defined as the proportion of excess expenditure relative to total medical expenditure.

1  
2  
3  
4  
5  
6  
7  
8  
9  
10  
11  
12  
13  
14  
15  
16  
17  
18  
19  
20  
21  
22  
23  
24  
25  
26  
27  
28  
29  
30  
31  
32  
33  
34  
35  
36  
37  
38  
39  
40  
41  
42  
43  
44  
45  
46  
47  
48  
49  
50  
51  
52  
53  
54  
55  
56  
57  
58  
59  
60

Fig. 1

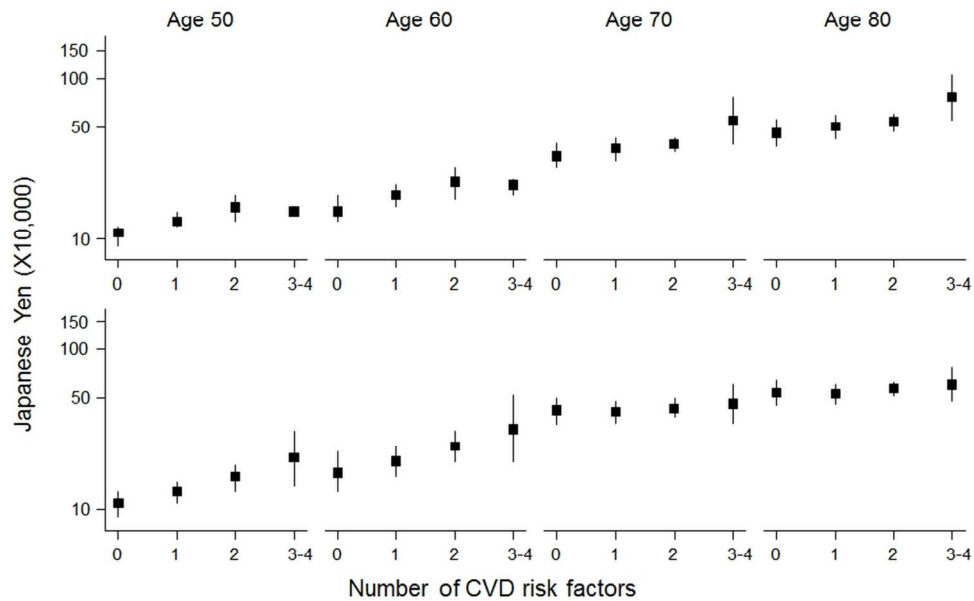

120x90mm (300 x 300 DPI)

ew only

1  
2  
3  
4  
5  
6  
7  
8  
9  
10  
11  
12  
13  
14  
15  
16  
17  
18  
19  
20  
21  
22  
23  
24  
25  
26  
27  
28  
29  
30  
31  
32  
33  
34  
35  
36  
37  
38  
39  
40  
41  
42  
43  
44  
45  
46  
47  
48  
49  
50  
51  
52  
53  
54  
55  
56  
57  
58  
59  
60

Fig 2

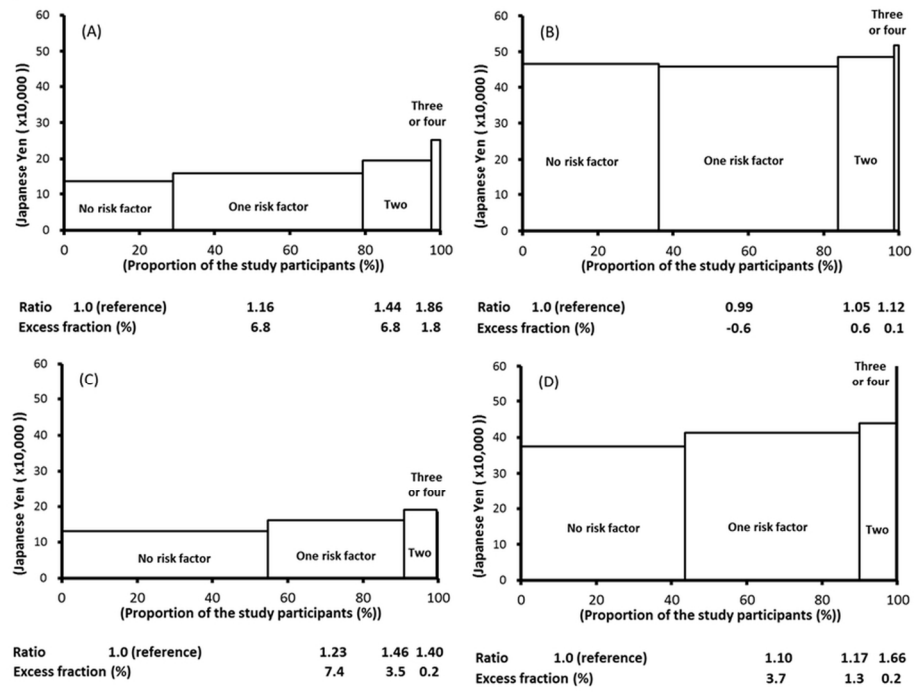

120x90mm (300 x 300 DPI)

Review only
